# Supplementary material for: Insect Pollinator Monitoring in and around a Netted Plot of Apple Trees—Biosafety Implications for Genetically Engineered Fruit Trees
Source: MDPI journal article supplement (doi:10.3390/agronomy13010084), 2022-12-27
Supplement: s1 [file s1]

## **Insect pollinator monitoring in and around a netted plot of apple trees – biosafety implications for genetically engineered fruit trees**

Michael Meissle <sup>1,\*</sup>, Mario Waldburger <sup>1</sup>, Philippe Jeanneret <sup>1</sup>, Giovanni A. L. Broggini <sup>2,3</sup>, Andrea Patocchi <sup>2</sup> and Jörg Romeis <sup>1</sup>

<sup>1</sup> Research Division Agroecology and Environment, Agroscope, Reckenholzstrasse 191, 8046 Zurich, Switzerland

<sup>2</sup> Research Division Plant Breeding, Agroscope, Mueller-Thurgau-Strasse 29, 8820 Wädenswil, Switzerland

<sup>3</sup> Molecular Plant Breeding, Institute of Agricultural Sciences, ETH Zurich, Universitaetstrasse 2, 8092 Zurich, Switzerland

\* Correspondence: michael.meissle@agroscope.admin.ch; Tel.: +41-58-468-7396

### **Supplementary Materials 1: Tables and Figures**

**Table S1.** Average temperature and total precipitation. Values during the sampling periods in 2016 to 2019 are presented based on daily data from the weather station REH, Reckenholz, Zurich, Switzerland (47.4277°N, 8.5179°E, 443m above sea level).

| <b>Sampling period</b> | <b>Temperature [°C]</b> | <b>Precipitation [mm]</b> |
|------------------------|-------------------------|---------------------------|
| 9.5.-24.6.2016         | 15.2                    | 320                       |
| 4.4.-15.5.2017         | 9.8                     | 137                       |
| 6.4.-7.5.2018          | 14.0                    | 6                         |
| 5.4.-22.5.2019         | 9.7                     | 145                       |

**Table S2.** Yearly abundance of different arthropod taxa. Arthropods were collected in coloured pan traps placed inside and outside a netted plot of apple trees in Zurich, Switzerland, during the flowering period of the ‘Ladina’ and ‘Nicogreen’ trees included in the experiment in the years 2016-2019. Collected specimens of holometabolic groups were adults unless stated otherwise.

|                          | 2016        |             | 2017        |             | 2018        |             | 2019        |             | Total        |              |
|--------------------------|-------------|-------------|-------------|-------------|-------------|-------------|-------------|-------------|--------------|--------------|
|                          | inside      | outside     | inside      | outside     | inside      | outside     | inside      | outside     | inside       | outside      |
| <b>Diptera total</b>     | <b>2010</b> | <b>4122</b> | <b>2260</b> | <b>4814</b> | <b>696</b>  | <b>884</b>  | <b>2611</b> | <b>2609</b> | <b>7577</b>  | <b>12429</b> |
| Asilidae                 | 0           | 32          | 168         | 767         | 12          | 49          | 65          | 301         | 245          | 1149         |
| Chloropidae              | 24          | 875         | 0           | 21          | 0           | 0           | 0           | 2           | 24           | 898          |
| Syrphidae                | 0           | 13          | 0           | 5           | 0           | 2           | 0           | 5           | 0            | 25           |
| other Brachycera         | 1877        | 3074        | 1355        | 2726        | 463         | 558         | 1979        | 1607        | 5674         | 7965         |
| Tipulidae                | 6           | 3           | 2           | 5           | 11          | 0           | 75          | 1           | 94           | 9            |
| other Nematocera         | 103         | 125         | 735         | 1290        | 210         | 275         | 492         | 693         | 1540         | 2383         |
| <b>Hymenoptera total</b> | <b>133</b>  | <b>409</b>  | <b>166</b>  | <b>342</b>  | <b>150</b>  | <b>735</b>  | <b>465</b>  | <b>669</b>  | <b>914</b>   | <b>2155</b>  |
| Symphyta                 | 0           | 5           | 5           | 17          | 10          | 18          | 33          | 18          | 48           | 58           |
| parasitoids              | 105         | 107         | 79          | 76          | 36          | 60          | 63          | 97          | 283          | 340          |
| Formicidae               | 11          | 29          | 10          | 30          | 11          | 32          | 12          | 48          | 44           | 139          |
| <i>Bombus</i> spp.       | 0           | 4           | 0           | 5           | 0           | 3           | 0           | 0           | 0            | 12           |
| other Apoidea            | 16          | 261         | 72          | 204         | 91          | 615         | 353         | 500         | 532          | 1580         |
| other Hymenoptera        | 1           | 3           | 0           | 10          | 2           | 7           | 4           | 6           | 7            | 26           |
| <b>Coleoptera total</b>  | <b>83</b>   | <b>407</b>  | <b>150</b>  | <b>469</b>  | <b>294</b>  | <b>325</b>  | <b>338</b>  | <b>748</b>  | <b>865</b>   | <b>1949</b>  |
| Nitidulidae              | 41          | 223         | 108         | 302         | 272         | 242         | 273         | 519         | 694          | 1286         |
| Staphylinidae            | 16          | 57          | 18          | 104         | 10          | 38          | 20          | 118         | 64           | 317          |
| Curculionidae            | 1           | 9           | 3           | 2           | 1           | 2           | 2           | 30          | 7            | 43           |
| Alticini                 | 2           | 4           | 2           | 2           | 0           | 6           | 6           | 11          | 10           | 23           |
| Coccinellidae            | 0           | 11          | 2           | 1           | 0           | 5           | 2           | 3           | 4            | 20           |
| - larvae                 | 0           | 0           | 0           | 1           | 0           | 0           | 0           | 0           | 0            | 1            |
| other Coleoptera         | 23          | 103         | 17          | 57          | 11          | 32          | 35          | 67          | 86           | 259          |
| <b>Hemiptera total</b>   | <b>168</b>  | <b>228</b>  | <b>47</b>   | <b>126</b>  | <b>18</b>   | <b>39</b>   | <b>20</b>   | <b>63</b>   | <b>253</b>   | <b>456</b>   |
| Aphididae                | 145         | 208         | 34          | 107         | 17          | 31          | 16          | 41          | 212          | 387          |
| Heteroptera              | 11          | 10          | 5           | 4           | 0           | 4           | 3           | 14          | 19           | 32           |
| Cicadellidae             | 9           | 5           | 7           | 12          | 1           | 3           | 0           | 5           | 17           | 25           |
| Psyllidae                | 3           | 5           | 1           | 3           | 0           | 1           | 1           | 3           | 5            | 12           |
| <b>Collembola</b>        | <b>1209</b> | <b>48</b>   | <b>31</b>   | <b>24</b>   | <b>33</b>   | <b>22</b>   | <b>3</b>    | <b>15</b>   | <b>1276</b>  | <b>109</b>   |
| <b>Thysanoptera</b>      | <b>85</b>   | <b>154</b>  | <b>86</b>   | <b>148</b>  | <b>42</b>   | <b>34</b>   | <b>167</b>  | <b>430</b>  | <b>380</b>   | <b>766</b>   |
| <b>Araneae</b>           | <b>15</b>   | <b>15</b>   | <b>18</b>   | <b>8</b>    | <b>18</b>   | <b>9</b>    | <b>21</b>   | <b>21</b>   | <b>72</b>    | <b>53</b>    |
| <b>Lepidoptera total</b> | <b>0</b>    | <b>3</b>    | <b>2</b>    | <b>6</b>    | <b>1</b>    | <b>6</b>    | <b>3</b>    | <b>3</b>    | <b>6</b>     | <b>18</b>    |
| - adult                  | 0           | 3           | 2           | 6           | 1           | 2           | 2           | 3           | 5            | 14           |
| - larva                  | 0           | 0           | 0           | 0           | 0           | 4           | 1           | 0           | 1            | 4            |
| <b>Neuroptera total</b>  | <b>2</b>    | <b>5</b>    | <b>1</b>    | <b>2</b>    | <b>0</b>    | <b>0</b>    | <b>0</b>    | <b>0</b>    | <b>3</b>     | <b>7</b>     |
| - adult                  | 2           | 5           | 0           | 2           | 0           | 0           | 0           | 0           | 2            | 7            |
| - larva                  | 0           | 0           | 1           | 0           | 0           | 0           | 0           | 0           | 1            | 0            |
| <b>Psocoptera</b>        | <b>0</b>    | <b>0</b>    | <b>2</b>    | <b>1</b>    | <b>0</b>    | <b>0</b>    | <b>1</b>    | <b>1</b>    | <b>3</b>     | <b>2</b>     |
| <b>Mecoptera</b>         | <b>0</b>    | <b>0</b>    | <b>1</b>    | <b>1</b>    | <b>0</b>    | <b>1</b>    | <b>0</b>    | <b>0</b>    | <b>1</b>     | <b>2</b>     |
| <b>Myriapoda</b>         | <b>0</b>    | <b>2</b>    | <b>0</b>     | <b>2</b>     |
| <b>Orthoptera</b>        | <b>0</b>    | <b>1</b>    | <b>0</b>     | <b>1</b>     |
| <b>Acarina</b>           | <b>0</b>    | <b>0</b>    | <b>0</b>    | <b>0</b>    | <b>0</b>    | <b>1</b>    | <b>0</b>    | <b>0</b>    | <b>0</b>     | <b>1</b>     |
| <b>Plecoptera</b>        | <b>0</b>    | <b>0</b>    | <b>0</b>    | <b>0</b>    | <b>0</b>    | <b>1</b>    | <b>0</b>    | <b>0</b>    | <b>0</b>     | <b>1</b>     |
| <b>Dermaptera</b>        | <b>0</b>    | <b>0</b>    | <b>0</b>    | <b>1</b>    | <b>0</b>    | <b>0</b>    | <b>0</b>    | <b>0</b>    | <b>0</b>     | <b>1</b>     |
| <b>Undetermined</b>      | <b>0</b>    | <b>0</b>    | <b>0</b>    | <b>0</b>    | <b>0</b>    | <b>1</b>    | <b>0</b>    | <b>1</b>    | <b>0</b>     | <b>2</b>     |
| <b>Total</b>             | <b>3705</b> | <b>5391</b> | <b>2764</b> | <b>5942</b> | <b>1252</b> | <b>2058</b> | <b>3629</b> | <b>4563</b> | <b>11350</b> | <b>17954</b> |

**Table S3.** Yearly abundance of bee species. Bees were collected in coloured pan traps placed inside and outside a netted plot of apple trees in Zurich, Switzerland, during the flowering period of the ‘Ladina’ and ‘Nicogreen’ trees included in the experiment in the years 2016-2019. The last 2 columns contain species collected before the hail net was closed in 2019. All remaining data are from collections after the net was closed. Abbreviations of species names (used for ordination plots, Figure 4 in the main manuscript and Figure S3) are composed of the first 3 letters of the genus and the species name, followed by the sex (m = male, f = female, w = worker for *Apis mellifera* and *Bombus* spp.).

| Species                                    | Sex    | Abbreviation | Thorax width [mm] | 2016   |         | 2017   |         | 2018   |         | 2019   |         | Total  |         | Open net 2019 |         |
|--------------------------------------------|--------|--------------|-------------------|--------|---------|--------|---------|--------|---------|--------|---------|--------|---------|---------------|---------|
|                                            |        |              |                   | inside | outside | inside        | outside |
| <i>Andrena alfkenella</i> Perkins 1914     | female | -            |                   |        |         |        |         |        |         |        |         |        |         | 1             |         |
| <i>Andrena bicolor</i> Fabricius 1775      | female | Andbicf      | 2.8               |        |         | 1      | 4       | 2      | 3       | 1      | 3       | 4      | 10      | 13            | 7       |
| <i>Andrena bucephala</i> Stephens 1846     | female | -            | 3.2               |        |         |        | 1       |        |         |        |         |        | 1       |               |         |
| <i>Andrena chrysosceles</i> (Kirby 1802)   | male   | -            | 2.0               |        |         |        |         |        | 1       |        |         |        | 1       |               |         |
| <i>Andrena cineraria</i> (Linnaeus 1758)   | female | Andcinf      | 3.8               |        | 1       | 1      | 3       | 1      |         |        | 2       | 2      | 6       | 2             |         |
|                                            | male   | -            | 3.1               |        |         |        | 1       |        | 3       |        |         |        | 4       |               | 12      |
| <i>Andrena dorsata</i> (Kirby 1802)        | female | -            | 3.0               |        |         | 1      |         |        |         | 1      |         | 2      |         | 1             | 2       |
| <i>Andrena flavipes</i> Panzer 1799        | female | -            | 3.3               |        |         |        |         |        | 3       |        |         |        | 3       | 1             | 1       |
|                                            | male   | Andflam      | 2.7               |        |         |        |         |        |         | 5      | 1       | 5      | 1       | 5             |         |
| <i>Andrena fulva</i> (Müller 1766)         | female | -            | 4.1               |        |         |        |         |        | 1       | 1      | 1       | 1      | 2       |               |         |
| <i>Andrena fulvago</i> (Christ 1791)       | male   | -            |                   |        |         |        |         | 1      |         |        |         | 1      |         |               |         |
| <i>Andrena fulvata</i> Stoeckert 1930      | female | -            | 2.9               |        |         |        |         |        | 1       |        | 1       |        | 2       | 1             | 2       |
|                                            | male   | -            | 2.6               |        |         |        |         |        |         |        |         |        |         | 1             |         |
| <i>Andrena grvida</i> Imhoff 1832          | female | -            | 3.8               |        |         |        | 1       |        |         |        | 1       |        | 2       |               |         |
| <i>Andrena haemorrhoa</i> (Fabricius 1781) | female | Andhaef      | 3.6               |        | 4       | 1      | 3       |        | 2       |        | 3       | 1      | 12      | 2             |         |
|                                            | male   | Andhaem      | 2.8               |        |         | 1      | 3       | 2      | 7       | 1      | 1       | 4      | 11      |               |         |
| <i>Andrena helvola</i> (Linnaeus 1758)     | female | -            | 3.1               |        |         |        | 1       |        |         |        |         |        | 1       | 1             |         |
| <i>Andrena humilis</i> Imhoff 1832         | female | Andhumf      | 3.3               | 1      | 15      |        |         |        |         |        | 1       | 1      | 16      | 11            | 8       |
|                                            | male   | -            | 3.0               |        |         |        |         |        |         |        |         |        |         | 2             | 2       |
| <i>Andrena minutula</i> (Kirby 1802)       | female | Andminf      | 2.1               |        | 4       | 4      | 11      | 1      | 1       | 11     | 4       | 16     | 20      | 1             | 3       |
| <i>Andrena mitis</i> Schmiedeknecht 1883   | female | -            | 3.1               |        | 1       |        | 1       |        |         |        |         |        | 2       |               |         |
|                                            | male   | -            | 2.5               |        |         |        |         |        |         |        | 1       |        | 1       |               |         |
| <i>Andrena nigroolivacea</i> Dours 1873    | female | -            | 3.5               |        | 1       |        |         |        |         |        |         |        | 1       |               |         |
| <i>Andrena nitida</i> (Müller 1776)        | female | -            | 4.3               |        |         |        | 1       |        | 1       |        | 1       |        | 3       |               | 1       |
|                                            | male   | -            | 3.3               |        |         |        |         |        | 1       |        |         |        | 1       |               | 2       |
| <i>Andrena ovatula</i> (Kirby 1802)        | female | -            | 2.9               |        |         |        |         |        | 1       |        | 1       |        | 2       |               |         |
|                                            | male   | -            | 2.4               |        |         |        |         |        |         | 2      |         | 2      |         |               |         |
| <i>Andrena subopaca</i> Nylander 1848      | female | Andsubf      |                   |        |         | 4      |         | 2      |         |        |         | 6      |         |               |         |
| <i>Andrena vaga</i> Panzer 1799            | female | Andvagf      | 4.1               |        |         | 1      | 37      |        | 14      | 27     | 78      | 28     | 129     | 23            | 21      |
|                                            | male   | Andvagm      | 3.2               |        |         |        | 13      |        | 22      | 25     | 46      | 25     | 81      | 107           | 199     |

|                                                   |        |         |     |   |    |    |    |    |     |     |     |     |     |     |     |
|---------------------------------------------------|--------|---------|-----|---|----|----|----|----|-----|-----|-----|-----|-----|-----|-----|
| <i>Apis mellifera</i> Linnaeus 1758               | worker | Apimelw | 4.2 | 1 | 96 |    | 27 |    | 1   |     | 8   | 1   | 132 | 3   | 3   |
| <i>Bombus pascuorum</i> (Scopoli 1763)            | female | -       | 6.7 |   |    |    | 1  |    |     |     |     |     | 1   |     |     |
| <i>Bombus pratorum</i> (Linnaeus 1761)            | worker | -       | 4.8 |   | 1  |    |    |    |     |     |     |     | 1   |     |     |
| <i>Bombus sylvarum</i> (Linnaeus 1761)            | female | -       | 6.7 |   |    |    | 1  |    | 2   |     |     |     | 3   |     |     |
|                                                   | worker | -       | 4.7 |   | 1  |    |    |    |     |     |     |     | 1   |     |     |
| <i>Bombus terrestris</i> (Linnaeus 1758)          | female | -       | 8.3 |   |    |    | 2  |    |     |     |     |     | 2   |     |     |
| <i>Bombus terrestris</i> -group                   | worker | -       | 5.5 |   | 2  |    |    |    | 1   |     |     |     | 3   |     |     |
| <i>Bombus veteranus</i> (Fabricius 1793)          | female | -       | 6.7 |   |    |    | 1  |    |     |     |     |     | 1   |     |     |
| <i>Chelostoma florissomne</i> (Linnaeus 1758)     | female | Cheflef | 2.4 | 4 |    |    |    |    |     | 3   |     | 7   |     |     |     |
|                                                   | male   | Cheflom | 2.4 | 4 |    | 1  | 1  | 11 |     | 4   | 1   | 20  | 2   |     |     |
| <i>Colletes cunicularius</i> (Linnaeus 1761)      | female | Colcunf | 4.8 |   | 5  |    | 14 |    | 11  | 3   | 20  | 3   | 50  | 7   | 7   |
|                                                   | male   | Colcunm | 4.2 |   |    |    |    | 2  | 384 | 14  | 13  | 16  | 397 | 82  | 113 |
| <i>Halictus scabiosae</i> (Rossi 1790)            | female | Halscaf | 3.6 |   | 15 |    | 2  |    |     |     | 3   |     | 20  |     |     |
| <i>Halictus simplex</i> Blüthgen 1923 - group     | female | Halsimf | 3.0 | 1 | 39 | 2  | 5  |    | 1   | 4   |     | 7   | 45  |     | 1   |
| <i>Halictus tumulorum</i> (Linnaeus 1758)         | female | Haltumf | 2.1 | 1 | 5  | 5  | 8  | 1  | 6   | 2   | 1   | 9   | 20  |     |     |
| <i>Lasioglossum albipes</i> (Fabricius 1781)      | female | -       | 2.2 |   | 1  |    |    |    |     |     |     |     | 1   |     |     |
| <i>Lasioglossum calceatum</i> (Scopoli 1763)      | female | Lascalf | 2.7 |   | 11 | 5  | 8  | 8  | 55  | 9   | 43  | 22  | 117 |     | 7   |
| <i>Lasioglossum fulvicorne</i> (Kirby 1802)       | female | -       | 2.2 |   |    |    | 1  |    |     |     |     |     | 1   |     |     |
| <i>Lasioglossum glabriusculum</i> (Morawitz 1872) | female | Lasglaf | 1.4 | 1 | 4  | 5  | 7  |    |     |     | 10  | 6   | 21  |     |     |
| <i>Lasioglossum laticeps</i> (Schenck 1868)       | female | Laslatf | 2.2 | 1 |    | 2  | 2  | 2  | 7   | 9   | 9   | 14  | 18  |     |     |
| <i>Lasioglossum lativentre</i> (Schenck 1853)     | female | -       | 2.3 |   | 1  |    |    |    |     |     |     |     | 1   |     |     |
| <i>Lasioglossum leucozonium</i> (Schränk 1781)    | female | Lasleuf | 2.7 |   | 10 |    |    |    |     |     |     |     | 10  |     |     |
| <i>Lasioglossum malachurum</i> (Kirby 1802)       | female | Lasmalf | 2.5 |   | 33 | 22 | 30 | 53 | 63  | 203 | 155 | 278 | 281 | 160 | 174 |
| <i>Lasioglossum morio</i> (Fabricius 1793)        | female | Lasmorf | 1.6 |   |    |    | 1  |    |     | 2   | 4   | 2   | 5   |     |     |
| <i>Lasioglossum pallens</i> (Brullé 1832)         | female | -       | 2.5 |   | 1  | 1  |    |    |     |     |     | 1   | 1   |     |     |
|                                                   | male   | -       |     |   |    |    |    | 1  |     |     |     | 1   |     |     |     |
| <i>Lasioglossum pauxillum</i> (Schenck 1853)      | female | Laspauf | 1.8 | 2 | 5  | 15 | 5  | 3  | 2   | 21  | 11  | 41  | 23  |     | 1   |
| <i>Lasioglossum politum</i> (Schenck 1853)        | female | Laspolf | 1.4 |   |    |    |    |    | 2   | 1   | 13  | 1   | 15  |     |     |
| <i>Lasioglossum villosulum</i> (Kirby 1802)       | female | -       | 1.9 |   | 1  |    |    |    |     | 1   |     | 1   | 1   |     |     |
| <i>Lasioglossum zonulum</i> (Schränk 1781)        | female | Laszonf | 2.8 |   | 5  |    | 3  |    |     |     |     |     | 8   |     |     |
| <i>Megachile circumcincta</i> (Kirby 1802)        | female | -       | 4.9 |   | 1  |    |    |    |     |     |     |     | 1   |     |     |
| <i>Megachile willughbiella</i> (Kirby 1802)       | female | -       | 3.7 |   | 1  |    |    |    |     |     |     |     | 1   |     |     |
| <i>Osmia bicornis</i> (Linnaeus 1758)             | female | -       | 4.0 |   | 1  |    | 1  |    |     |     |     |     | 2   |     |     |
|                                                   | male   | Osmbicm | 3.5 |   |    |    | 3  |    | 7   |     | 8   |     | 18  |     | 1   |
| <i>Osmia brevicornis</i> (Fabricius 1798)         | male   | -       |     |   |    |    |    | 1  |     |     |     | 1   |     |     |     |
| <i>Osmia caerulea</i> (Linnaeus 1758)             | male   | -       | 2.8 |   |    |    |    |    |     | 1   |     | 1   |     |     |     |
| <i>Osmia cornuta</i> (Latreille 1805)             | female | Osmcorf | 5.1 |   |    |    |    |    | 2   |     | 9   |     | 11  | 1   | 4   |
|                                                   | male   | Osmcorm | 4.2 |   |    |    | 6  |    | 13  | 1   | 47  | 1   | 66  | 2   | 19  |
| <i>Sphecodes ephippius</i> (Linnaeus 1767)        | female | -       | 1.8 |   |    |    |    |    |     | 1   |     | 1   |     |     |     |

**Table S4.** Bee species collected in pan traps covered with hail net and in open traps. Coloured pan traps were placed in an established row of high stem apple trees in Zurich, Switzerland, during the flowering period 16 March – 8 May 2020. The pots of three trapping stations were covered with hail netting while the pots of one station was open.

| <b>Species</b>                               | <b>Sex</b> | <b>Thorax width<br/>[mm]</b> | <b>Open<br/>1 trap</b> | <b>With net<br/>3 traps</b> |
|----------------------------------------------|------------|------------------------------|------------------------|-----------------------------|
| <i>Andrena cineraria</i> (Linnaeus 1758)     | female     | 4.1                          | 2                      |                             |
|                                              | male       | 3.2                          | 2                      |                             |
| <i>Andrena vaga</i> Panzer 1799              | female     | 4.1                          | 16                     |                             |
|                                              | male       | 3.1                          | 30                     |                             |
| <i>Apis mellifera</i> Linnaeus 1758          | worker     | 4.2                          | 3                      |                             |
| <i>Bombus sylvarum</i> (Linnaeus 1761)       | female     | 6.8                          | 1                      |                             |
| <i>Colletes cunicularius</i> (Linnaeus 1761) | female     | 4.9                          | 12                     |                             |
|                                              | male       | 4.1                          | 77                     |                             |
| <i>Halictus scabiosae</i> (Rossi 1790)       | female     | 3.5                          | 7                      |                             |
| <i>Halictus simplex</i> -group Blüthgen 1923 | female     | 2.8                          | 4                      |                             |
| <i>Lasioglossum calceatum</i> (Scopoli 1763) | female     | 2.8                          | 2                      | 1                           |
| <i>Lasioglossum laticeps</i> (Schenck 1868)  | female     | 2.1                          | 1                      | 6                           |
| <i>Lasioglossum malachurum</i> (Kirby 1802)  | female     | 2.4                          | 9                      | 10                          |
| <i>Lasioglossum pallens</i> (Brullé 1832)    | female     | 2.1                          | 1                      |                             |
| <i>Lasioglossum politum</i> (Schenck 1853)   | female     | 1.6                          | 2                      | 1                           |
| <i>Osmia bicornis</i> (Linnaeus 1758)        | male       | 3.1                          | 1                      | 1                           |

**Table S5.** Hand-collected bees from inside the netted plot. Bees were collected inside the netted plot of apple trees in Zurich, Switzerland, during the flowering period of the ‘Ladina’ and ‘Nicogreen’ trees included in the experiment in the years 2016-2020. Large bees that were seen inside the netted plot when other work in the orchard was done, or after the flower observations, were caught sporadically. In the year 2020 (same setup of the netted plot as described for the years 2018 and 2019), an additional planned hand collection was conducted to collect bees recognized in relatively high numbers at the bottom of the insect side netting inside the netted plot.

| Species                                           | Sex    | Date       | Number |
|---------------------------------------------------|--------|------------|--------|
| <b>Sporadic hand collections 2016-2019</b>        |        |            |        |
| <i>Apis mellifera</i> Linnaeus 1758               | worker | 30.05.2016 | 1      |
| <i>Apis mellifera</i> Linnaeus 1758               | worker | 23.06.2016 | 1      |
| <i>Bombus humilis</i> Illiger 1806                | worker | 08.05.2018 | 2      |
| <i>Bombus sylvestris</i> Lepeletier 1832          | female | 08.05.2018 | 1      |
| <i>Halictus tumulorum</i> (Linnaeus 1758)         | female | 27.05.2016 | 1      |
| <i>Lasioglossum laticeps</i> (Schenck 1868)       | female | 25.04.2019 | 1      |
| <i>Osmia bicornis</i> (Linnaeus 1758)             | female | 24.04.2019 | 1      |
| <b>Planned hand collection 2020</b>               |        |            |        |
| <i>Halictus tumulorum</i> (Linnaeus 1758)         | female | 24.04.2020 | 5      |
| <i>Lasioglossum glabriusculum</i> (Morawitz 1872) | female | 24.04.2020 | 4      |
| <i>Lasioglossum pauxillum</i> (Schenck 1853)      | female | 24.04.2020 | 37     |
| <i>Lasioglossum politum</i> (Schenck 1853)        | female | 24.04.2020 | 4      |
| <i>Lasioglossum villosulum</i> (Kirby 1802)       | female | 24.04.2020 | 2      |
| <i>Sphecodes puncticeps</i> Thomson 187           | female | 24.04.2020 | 1      |

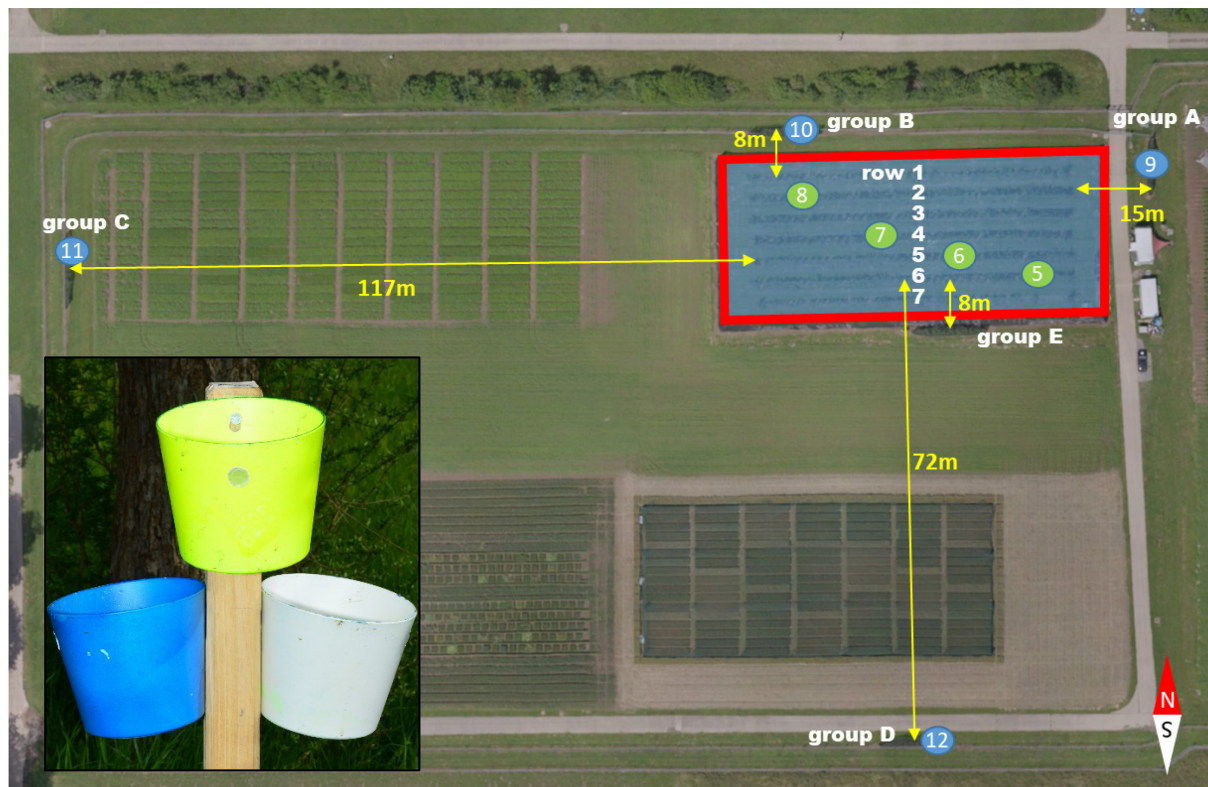

**Figure S1.** Aerial photograph of the experimental area. The red rectangle marks the netted plot of apple trees with the arthropod trapping stations 5-8 (green circles), placed in row 6, 5, 4, and 2. The position of the trapping stations 9-12 within the groups of 10 apple trees ('Nicogreen'; A-D) in each direction of the netted plot, are indicated as blue circles together with the distance to the nearest 'Ladina' trees. Inset picture: Trapping station with yellow, blue, and white plastic pot filled with water + detergent to collect arthropods.

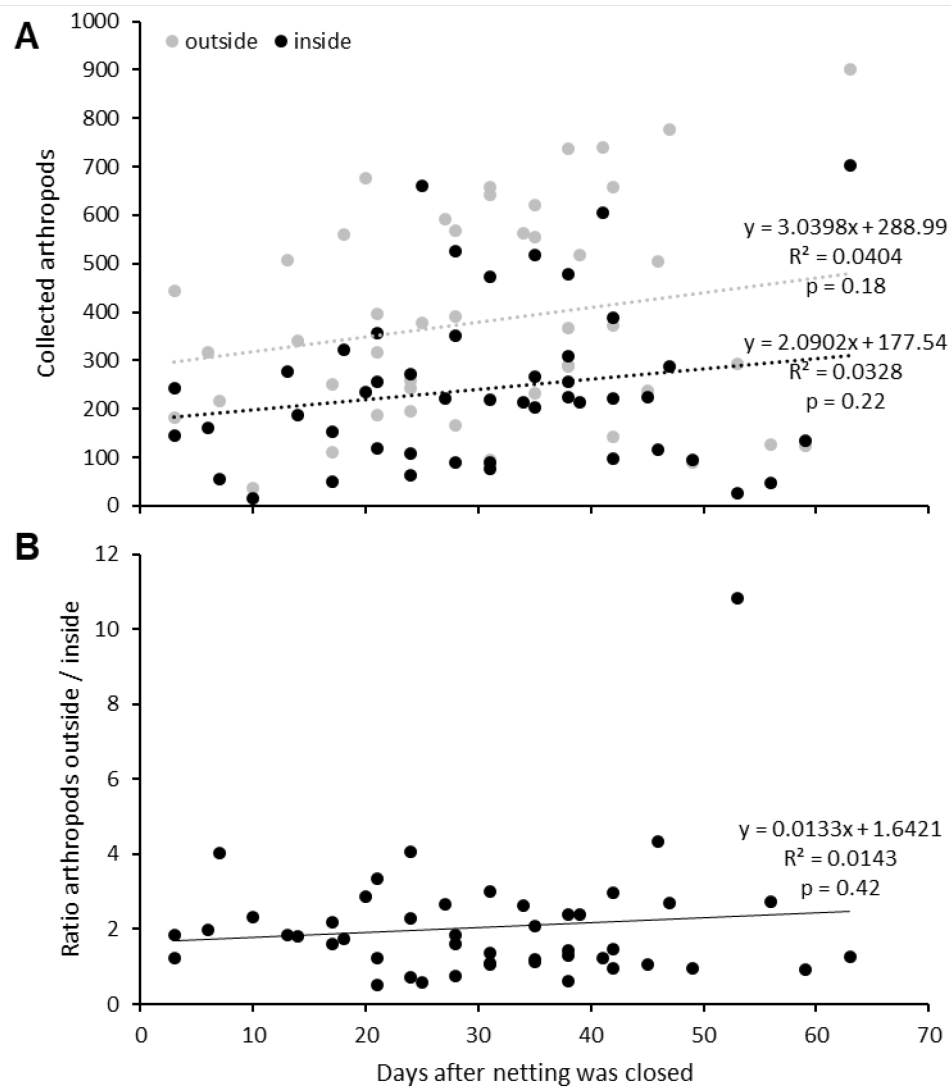

**Figure S2.** Arthropod numbers per sampling date. A) Arthropods collected outside and inside the netted plot over the years 2016-2019 for individual sampling dates, presented as days after the hail net was closed. B) Ratio of arthropods collected outside / inside. The trend lines represent linear regressions.



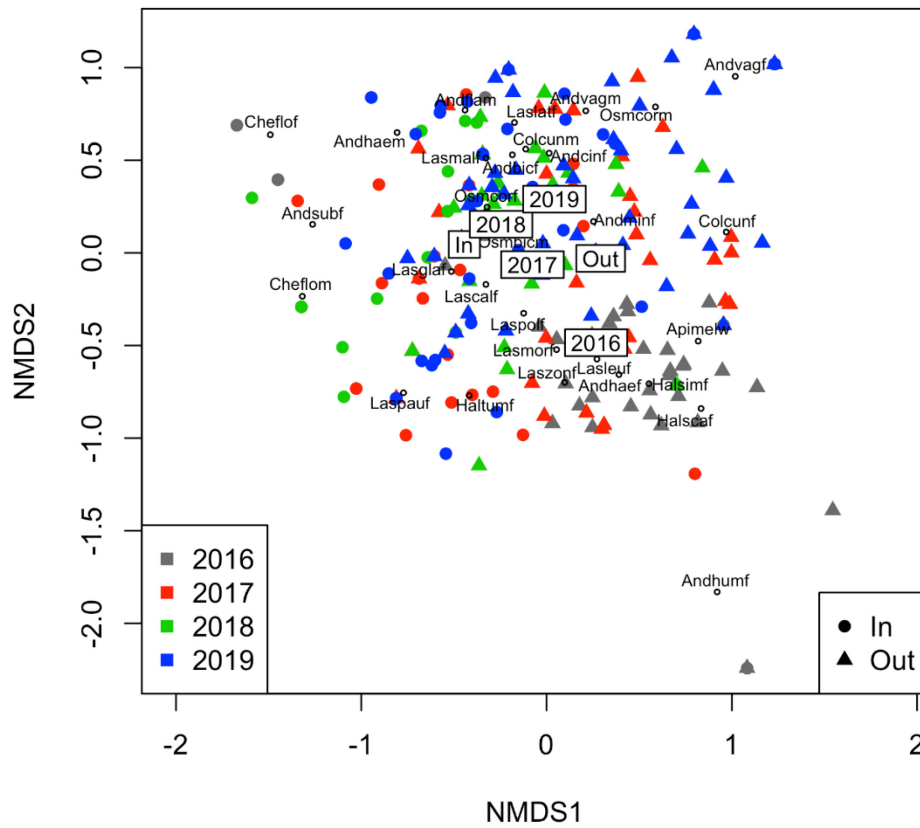

**Figure S3.** Ordination plot with data from each collection date. Multivariate ordination with non-metric multidimensional scaling (NMDS) of bees collected in coloured pan traps placed inside (circles) and outside (triangles) the netted plot of apple trees during the flowering period of the ‘Ladina’ and ‘Nicogreen’ trees included in the experiment in the years 2016-2019 (different colours). Each data point represents one collection date and one trapping station. Species with less than 5 collected individuals over all years and traps were not considered. Species names are abbreviated with the first 3 letters of the genus and the species name followed by the sex (m = male, f = female, w = worker). The centroids of each year and the plot type (in/out) are indicated in boxes.

**A**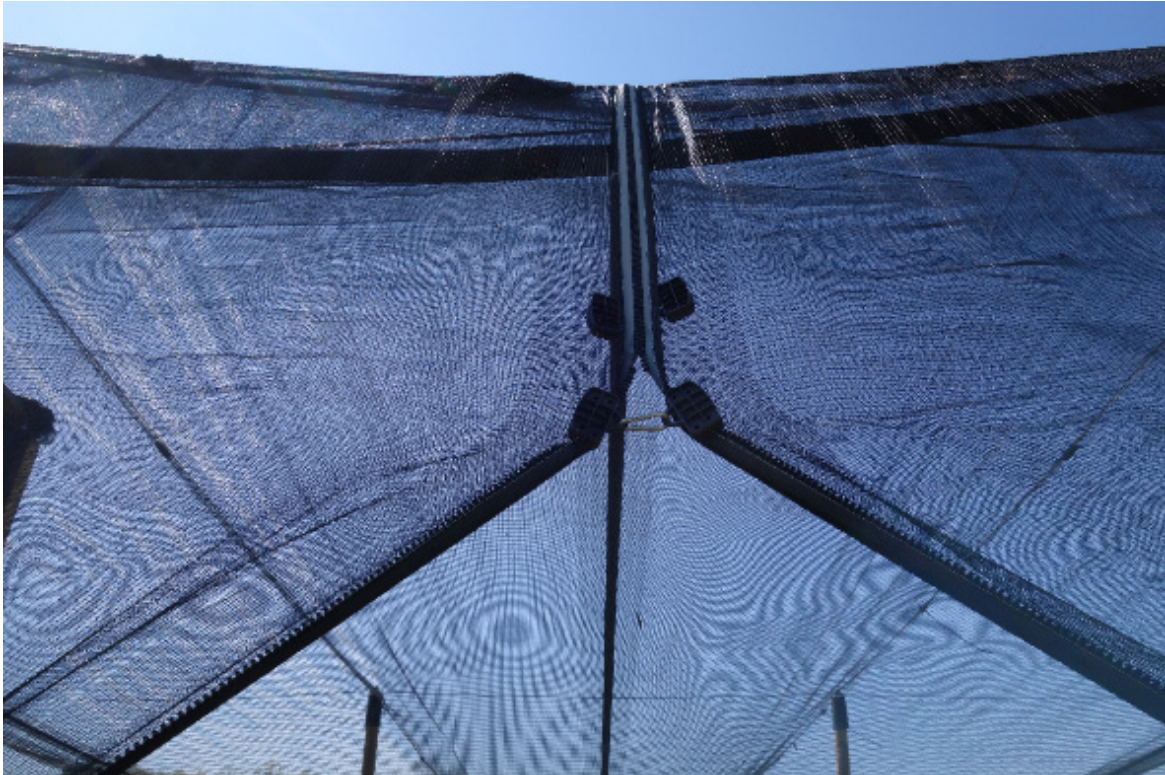**B**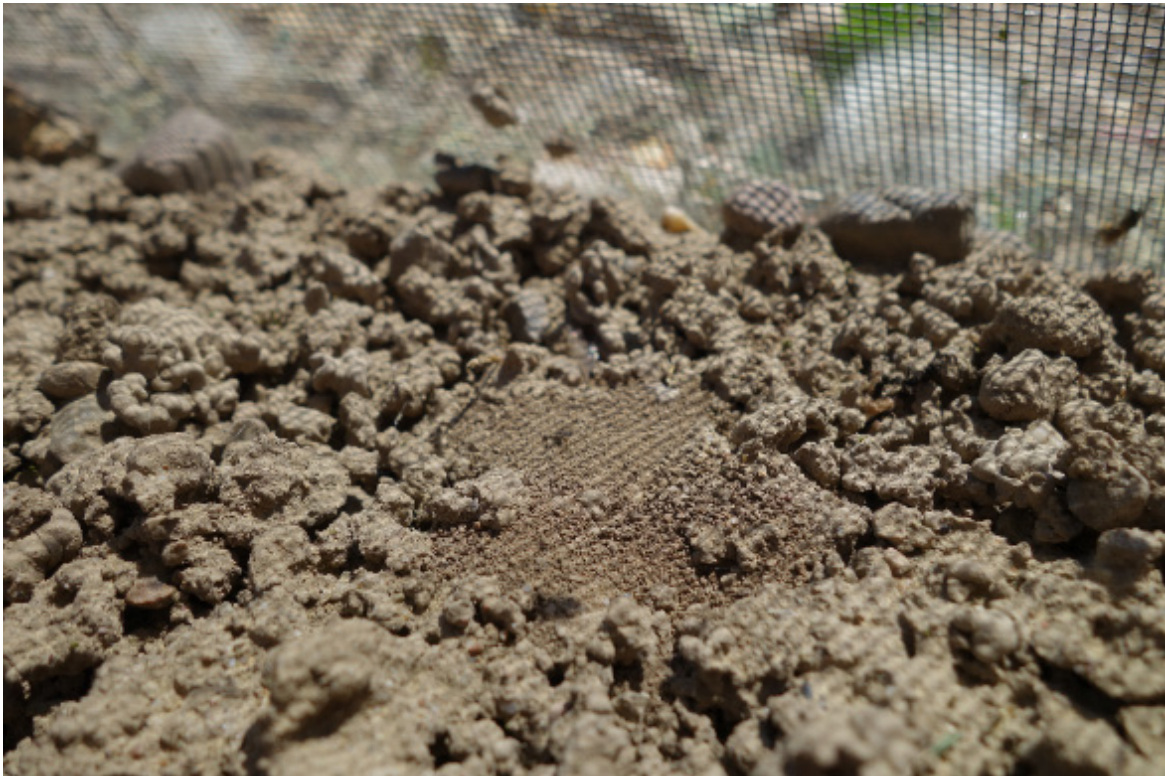

**Figure S4.** Net construction and bee nest. A) Net construction at the short sides of the netted plot of apple trees. The hail netting covering the plot, closed by zippers (2018, 2019), was spanned over the beam of the side netting construction. B) Fresh bee nests in the soil near the side netting inside the netted plot.
