# Supplementary material for: Insect Pollinator Monitoring in and around a Netted Plot of Apple Trees—Biosafety Implications for Genetically Engineered Fruit Trees
Source: MDPI journal article supplement (doi:10.3390/agronomy13010084), 2022-12-27
Supplement: s1 [file s1]

Archive with 2 entries (2 files):
- agronomy-2074846-Supplementary File S1_Supplementary Tables and Figures.pdf
- agronomy-2074846-Supplementary File S2_Data.xlsx
