# Supplementary material for: Insect Pollinator Monitoring in and around a Netted Plot of Apple Trees—Biosafety Implications for Genetically Engineered Fruit Trees
Source: MDPI journal article supplement (doi:10.3390/agronomy13010084), 2022-12-27
Supplement: s1 [file s1 › agronomy-2074846-Supplementary File S2_Data.xlsx]

## Sheet: Title page
Insect pollinator monitoring in and around a netted plot of apple trees – biosafety implications for genetically engineered fruit trees
Michael Meissle1,*, Mario Waldburger1, Philippe Jeanneret1, Giovanni A. L. Broggini2,3, Andrea Patocchi2, Jörg Romeis1
1 Research Division Agroecology and Environment, Agroscope, Reckenholzstrasse 191, 8046 Zurich, Switzerland
2 Research Division Plant Breeding, Agroscope, Mueller-Thurgau-Strasse 29, 8820 Waedenswil, Switzerland
4 Molecular Plant Breeding, Institute of Agricultural Sciences, ETH Zurich, Universitaetstrasse 2, 8092 Zurich, Switzerland
* Correspondence: michael.meissle@agroscope.admin.ch; Tel.: +41-58-468-7396

## Sheet: Pan traps all arthropods
				Diptera						Hymenoptera						Coleoptera							Hemiptera				Collembola	Thysanoptera	Araneae	Lepidoptera adult	Lepidoptera larva	Psocoptera	Neuroptera adult	Neuroptera larva	Mecoptera	Orthoptera	Dermaptera	Plecoptera	Acarina	Myriapoda	Unidentified	Remarks
Date	Trap colour	Trapping station	Netted block	Asilidae	Chloropidae	Syrphidae	other Brachycera	Tipulidae	other Nematocera	Symphyta	parasitoids	Formicidae	Bombus spp.	other Apidae	other Hymenoptera	Nitidulidae	Staphylinidae	Curculionidae	Alticini	Coccinellidae adult	Coccinellidae larva	other Coleoptera	Aphididae	Heteroptera	Cicadellidae	Psyllidae
2016-05-13	white	5	inside				5				1	1															4
2016-05-13	yellow	5	inside				11		1		6			1									5				30
2016-05-13	blue	5	inside				10				1												1				36	1
2016-05-13	white	6	inside				5				1																23
2016-05-13	yellow	6	inside				3				1			2			2						1				13
2016-05-13	blue	6	inside								5						1					1					20
2016-05-13	white	7	inside				3				2												1				17
2016-05-13	yellow	7	inside				5		2		6												2				46
2016-05-13	blue	7	inside				1				1											1	1				14
2016-05-13	white	8	inside				3					1										1					26
2016-05-13	yellow	8	inside				1				5			1									1				11
2016-05-13	blue	8	inside								1																10	1
2016-05-13	white	9	outside				5			1						2	1					1	2				2
2016-05-13	yellow	9	outside		1		4		3							3	1	1								1
2016-05-13	blue	9	outside				7		1								1					2
2016-05-13	white	10	outside		1		9		2		2				1	5							1				1	1
2016-05-13	yellow	10	outside				21		5					1		15						1	3
2016-05-13	blue	10	outside				7					1																1
2016-05-13	white	11	outside				8		1					1
2016-05-13	yellow	11	outside				1		1		2			1			2										1	1
2016-05-13	blue	11	outside				7		2													1					1	1
2016-05-13	white	12	outside				11										1					1	1				1			1
2016-05-13	yellow	12	outside				5		1		1					1	1					2
2016-05-13	blue	12	outside				6		1								1					3						2
2016-05-17	white	5	inside				15		2														1				31
2016-05-17	yellow	5	inside				7		6			1															36
2016-05-17	blue	5	inside				2																				33
2016-05-17	white	6	inside				5		2																		24
2016-05-17	yellow	6	inside				9				3			1									1				60
2016-05-17	blue	6	inside				14																				33	1
2016-05-17	white	7	inside				9		1					1									1				46
2016-05-17	yellow	7	inside				13				1			1								1					37
2016-05-17	blue	7	inside				9																				25	1
2016-05-17	white	8	inside				13		1		2	1					2										51
2016-05-17	yellow	8	inside				13							1									2				78
2016-05-17	blue	8	inside				7				1																56
2016-05-17	white	9	outside		2		28	1	5														1
2016-05-17	yellow	9	outside	1			23							2									2
2016-05-17	blue	9	outside				21		6		1			1
2016-05-17	white	10	outside		6		21		1							1											1
2016-05-17	yellow	10	outside		1		56							1		1	1					2	1				2
2016-05-17	blue	10	outside				4		1		1																1
2016-05-17	white	11	outside		1		48		2					3								1	2
2016-05-17	yellow	11	outside				8
2016-05-17	blue	11	outside				39		3																		1	1
2016-05-17	white	12	outside				33									2	1										1
2016-05-17	yellow	12	outside		1		9		2							1							1					1
2016-05-17	blue	12	outside				16		3								2										1
2016-05-20	white	5	inside				10										1						2				5
2016-05-20	yellow	5	inside				10		3		2											2	2				15	1
2016-05-20	blue	5	inside				6	1			2						1		1				1				11
2016-05-20	white	6	inside				29		3													2					23
2016-05-20	yellow	6	inside				5		2					2	1							1	1				23
2016-05-20	blue	6	inside				12				1											1	1				16
2016-05-20	white	7	inside				9		1		1																10
2016-05-20	yellow	7	inside				24				2												3				13	1
2016-05-20	blue	7	inside				19		2		2												1				5
2016-05-20	white	8	inside				17					1												1			6	1
2016-05-20	yellow	8	inside				9		2														3		1		4	1
2016-05-20	blue	8	inside				3		1													1					7	1
2016-05-20	white	9	outside		1		55		3													1						1
2016-05-20	yellow	9	outside		1		14				2			4		1	1						2		1		1	2
2016-05-20	blue	9	outside				22		1		1			1			1
2016-05-20	white	10	outside		7		34		1		1			6		1						2					1	3
2016-05-20	yellow	10	outside		4		41									4	1						3				1
2016-05-20	blue	10	outside				11		1		1			1
2016-05-20	white	11	outside				44		2			2				1	1											2
2016-05-20	yellow	11	outside		2		19		1	1				2	1		1						2					1
2016-05-20	blue	11	outside		1		55				1			1			1					1	1					1
2016-05-20	white	12	outside				120		1		1			1									1
2016-05-20	yellow	12	outside				12	1	4		1			3		1	2			1			1					2
2016-05-20	blue	12	outside				19		2		3			1		1	3					2
2016-05-23	white	5	inside				32									1						2	1				6
2016-05-23	yellow	5	inside				8				1	1						1					2				9		1
2016-05-23	blue	5	inside				20										1						1				8	1
2016-05-23	white	6	inside				49		1																		8	1
2016-05-23	yellow	6	inside				11		1		1											1					12
2016-05-23	blue	6	inside				30				1											1	1				3	4
2016-05-23	white	7	inside				48					1		1			1						2				8	1
2016-05-23	yellow	7	inside				26	1			2	1											3	1			7	1
2016-05-23	blue	7	inside				17		2														1				6	1
2016-05-23	white	8	inside				43															2	1				5	5	1
2016-05-23	yellow	8	inside				19		2		3			2									1		1		4	1
2016-05-23	blue	8	inside				17																2				10						1
2016-05-23	white	9	outside				74							1		3						2	1					1
2016-05-23	yellow	9	outside				26		1		1						2	1				2	2					1
2016-05-23	blue	9	outside		1		38		3		2					1	2			1		1							1
2016-05-23	white	10	outside		12		83		1		1			2			1			1		4	1					4
2016-05-23	yellow	10	outside		3		30				2			1		1			1			2	2					2
2016-05-23	blue	10	outside				12		2								1							1				5
2016-05-23	white	11	outside				32				2			1		1						3					1	1
2016-05-23	yellow	11	outside		2		8		2		1			3		1	1					4	3				1		1
2016-05-23	blue	11	outside				29				1			1		3						2	1					3
2016-05-23	white	12	outside				101		1		2												1				1
2016-05-23	yellow	12	outside				18				2			3		1	1						2			1		3	1
2016-05-23	blue	12	outside				39		2			3					1			1		3						1	2
2016-05-27	white	5	inside				20		2														2				8
2016-05-27	yellow	5	inside				10		8														2				4
2016-05-27	blue	5	inside				8				1																4						1
2016-05-27	white	6	inside		2		18																				9
2016-05-27	yellow	6	inside				2		1		2												1				1
2016-05-27	blue	6	inside				12																				4
2016-05-27	white	7	inside				38		2		2											1					5
2016-05-27	yellow	7	inside				11		1														1				12
2016-05-27	blue	7	inside				9		1								1										7
2016-05-27	white	8	inside		1		16				1						1										2
2016-05-27	yellow	8	inside				8																				4
2016-05-27	blue	8	inside				17		1																		2
2016-05-27	white	9	outside		3		65							6									1						1
2016-05-27	yellow	9	outside		3		12		3		1			6				1					4						2
2016-05-27	blue	9	outside				25		2		1			3									1				1	1
2016-05-27	white	10	outside		50		38					1		8		2						2						3
2016-05-27	yellow	10	outside		17		28				1			3								3	2					4
2016-05-27	blue	10	outside		2		23				1	2				1	1					2	1					2
2016-05-27	white	11	outside		1		34				2	1		3		1						1	1					1
2016-05-27	yellow	11	outside		1		9		1		1			9			1						2					1
2016-05-27	blue	11	outside				15											1					1				1	3
2016-05-27	white	12	outside		1		63		1		1			4			1										1
2016-05-27	yellow	12	outside				15				1			6			2					1	1	1
2016-05-27	blue	12	outside				21		1					1				1				1
2016-05-30	white	5	inside				15		2		1																10		1
2016-05-30	yellow	5	inside		1		3		1														1				5	1
2016-05-30	blue	5	inside				4				1																4
2016-05-30	white	6	inside		1		13		1					1									1				2
2016-05-30	yellow	6	inside				5				1																6
2016-05-30	blue	6	inside				8		1		1																3	1
2016-05-30	white	7	inside				11		3		2																4	4
2016-05-30	yellow	7	inside				12		2		2											1	2				7	1
2016-05-30	blue	7	inside		1		12		1														1				4	1
2016-05-30	white	8	inside		2		28		3		2																7	3
2016-05-30	yellow	8	inside		1		8		2		2											1	1		2		3	4
2016-05-30	blue	8	inside		1		14	1	1		1												1				3
2016-05-30	white	9	outside		2		23		1		1	1		2		1						1	1				1	2
2016-05-30	yellow	9	outside		3		8		1		2	2		3						1			3										1
2016-05-30	blue	9	outside		1		10		3								2		1			1	1	1				1		1
2016-05-30	white	10	outside		49		12		4		1	1		4			1											3
2016-05-30	yellow	10	outside		12		12			1												3						6
2016-05-30	blue	10	outside		3		6				4			1								2	1						1
2016-05-30	white	11	outside				10		2		1	2		1		1	1					2
2016-05-30	yellow	11	outside		1		8				2			4								1
2016-05-30	blue	11	outside		3		16		1		2			1		1						2					2	2
2016-05-30	white	12	outside				50					1		3			1											1
2016-05-30	yellow	12	outside				12		1		1			4			1	1										1		1
2016-05-30	blue	12	outside	1			8		3			1		1									1
2016-06-03	white	5	inside		1		13																				4	1
2016-06-03	yellow	5	inside				7		2														1				4	1
2016-06-03	blue	5	inside				12		2														1				4
2016-06-03	white	6	inside		2		19		1		1
2016-06-03	yellow	6	inside				4																				4		2
2016-06-03	blue	6	inside				11		1		1																2
2016-06-03	white	7	inside				12		1								1										1
2016-06-03	yellow	7	inside		1		11																1					2
2016-06-03	blue	7	inside		1		10	2			1						1										2
2016-06-03	white	8	inside		2		25		2														1				6
2016-06-03	yellow	8	inside		2		17		4																		1
2016-06-03	blue	8	inside				8		2		2																2
2016-06-03	white	9	outside		15		69				1			3														1
2016-06-03	yellow	9	outside		14		11				2			7						1		2	1
2016-06-03	blue	9	outside		2		26		2														1
2016-06-03	white	10	outside	2	250		26				1	1		3									1					2
2016-06-03	yellow	10	outside		73		9							3				1					1				1	1
2016-06-03	blue	10	outside		14		9																3
2016-06-03	white	11	outside		4		13				1			5								2	2				1
2016-06-03	yellow	11	outside		4		2				1			4									5					3
2016-06-03	blue	11	outside				4		1					2									1						1
2016-06-03	white	12	outside				10							3														1
2016-06-03	yellow	12	outside				5		1					2								1						1
2016-06-03	blue	12	outside		1		10							6													1
2016-06-07	white	5	inside		1																						1
2016-06-07	yellow	5	inside				4				1											1	3				8
2016-06-07	blue	5	inside				1																				4	1
2016-06-07	white	6	inside				8				1																3	1
2016-06-07	yellow	6	inside				4		1														3				11
2016-06-07	blue	6	inside				3					1
2016-06-07	white	7	inside				1							1									2				3	1
2016-06-07	yellow	7	inside		1		2		1		1					1							1
2016-06-07	blue	7	inside		1		5																1				3	2
2016-06-07	white	8	inside				2		1			1							1				1				1
2016-06-07	yellow	8	inside				3				1												5	1			2
2016-06-07	blue	8	inside		1		3																				5
2016-06-07	white	9	outside		2		26				2	1		1					1				1				1
2016-06-07	yellow	9	outside		2		9				2			4		1							5					1
2016-06-07	blue	9	outside				14				1			4								1
2016-06-07	white	10	outside		184		10				1	1		3		1							3					2
2016-06-07	yellow	10	outside		52		9		1		1		1	5									6				1	4
2016-06-07	blue	10	outside		3		9		1													1		1
2016-06-07	white	11	outside		2		16		3		1			2													1	3
2016-06-07	yellow	11	outside		8		7							7									4	1
2016-06-07	blue	11	outside				11															1	1					2
2016-06-07	white	12	outside				16					1		2		3	2						5	1				1
2016-06-07	yellow	12	outside				8				2			3									3
2016-06-07	blue	12	outside				3		1					3			1						1
2016-06-10	white	5	inside				5		1														1
2016-06-10	yellow	5	inside								1												3				2	1
2016-06-10	blue	5	inside				1		1		1						1						2				1
2016-06-10	white	6	inside				3		1		3												3				5
2016-06-10	yellow	6	inside				10									1							2
2016-06-10	blue	6	inside				2		2
2016-06-10	white	7	inside				4				1												3				3
2016-06-10	yellow	7	inside				3		2														2				1		1
2016-06-10	blue	7	inside				1							1
2016-06-10	white	8	inside				1																				1
2016-06-10	yellow	8	inside				6	1			1	1															2
2016-06-10	blue	8	inside				3																1				1	1
2016-06-10	white	9	outside				3	1	1							2
2016-06-10	yellow	9	outside		1		2							2								1					1
2016-06-10	blue	9	outside				4									1
2016-06-10	white	10	outside				3									1							1				3
2016-06-10	yellow	10	outside		4		2							1									1		1		1	1
2016-06-10	blue	10	outside				1		1					1									1
2016-06-10	white	11	outside						1					2			1					1
2016-06-10	yellow	11	outside		1		4				2					1	2					1	2
2016-06-10	blue	11	outside				3				1						1						1					2
2016-06-10	white	12	outside		1		2		1		1												1
2016-06-10	yellow	12	outside		1		1						1	1		1						1	3					1
2016-06-10	blue	12	outside				1										1						3
2016-06-14	white	5	inside				1																1				1
2016-06-14	yellow	5	inside
2016-06-14	blue	5	inside
2016-06-14	white	6	inside				1									1							1				1
2016-06-14	yellow	6	inside				1				1												4
2016-06-14	blue	6	inside				4
2016-06-14	white	7	inside
2016-06-14	yellow	7	inside				1									1									4		1		1
2016-06-14	blue	7	inside
2016-06-14	white	8	inside
2016-06-14	yellow	8	inside																				2
2016-06-14	blue	8	inside
2016-06-14	white	9	outside				18				6			3
2016-06-14	yellow	9	outside			2	9				7			4		2	1						7	2				1
2016-06-14	blue	9	outside				17		1					1		4						1	2					2
2016-06-14	white	10	outside	1	17		21		1					2		4							5	1	1
2016-06-14	yellow	10	outside		2		12		1							2							1		1			2
2016-06-14	blue	10	outside				6					1											1				1	2
2016-06-14	white	11	outside				13									3				1			4					2
2016-06-14	yellow	11	outside				8			1	1	1		2		3	1						3					3
2016-06-14	blue	11	outside				9							1		3						1	4
2016-06-14	white	12	outside				9							1		1							4
2016-06-14	yellow	12	outside				16							1		1						1	1					1
2016-06-14	blue	12	outside				12		1		1			1	1													1
2016-06-17	white	5	inside													2							2	1			2
2016-06-17	yellow	5	inside				1																1		1
2016-06-17	blue	5	inside
2016-06-17	white	6	inside				2				1
2016-06-17	yellow	6	inside				2																1
2016-06-17	blue	6	inside				6				1																1
2016-06-17	white	7	inside				3									1
2016-06-17	yellow	7	inside				1									1							3
2016-06-17	blue	7	inside
2016-06-17	white	8	inside								2					3	1						1
2016-06-17	yellow	8	inside				2				2					1							1
2016-06-17	blue	8	inside
2016-06-17	white	9	outside		1		6									2							2
2016-06-17	yellow	9	outside		1		7				2			2		3						1	2
2016-06-17	blue	9	outside				2				1			1
2016-06-17	white	10	outside	4	1		3				2
2016-06-17	yellow	10	outside		1		7		1		1					3												2
2016-06-17	blue	10	outside		1		4		1			1				2						1
2016-06-17	white	11	outside	1	3	2	2							2		6							2
2016-06-17	yellow	11	outside		1		3							2		6							1
2016-06-17	blue	11	outside		1		1							2		1							2
2016-06-17	white	12	outside				2		1							1											1	1
2016-06-17	yellow	12	outside		1	1	2		1					1		2							1
2016-06-17	blue	12	outside				3				1																	1
2016-06-20	white	5	inside				27		1														1				1
2016-06-20	yellow	5	inside		1		5		1							1							1
2016-06-20	blue	5	inside													2							1				1
2016-06-20	white	6	inside				11		1							1							1					1
2016-06-20	yellow	6	inside				3									2							1				1	1
2016-06-20	blue	6	inside				9									1											1	2
2016-06-20	white	7	inside				12									2
2016-06-20	yellow	7	inside				2		1		1					2												2
2016-06-20	blue	7	inside				1									6
2016-06-20	white	8	inside				2		1							1						1				1		1
2016-06-20	yellow	8	inside				3				1					1							3					3
2016-06-20	blue	8	inside				1				2					3							1	1
2016-06-20	white	9	outside				1									1						1	1
2016-06-20	yellow	9	outside				1									1						1	1
2016-06-20	blue	9	outside				6							1		1	1	1
2016-06-20	white	10	outside				1							1		4						1	2
2016-06-20	yellow	10	outside		3									1		5						2	5					5
2016-06-20	blue	10	outside		1		1				1			1		1						1	2					1
2016-06-20	white	11	outside			1	1
2016-06-20	yellow	11	outside				2							4		7				1		1	3
2016-06-20	blue	11	outside				1							1		3						1
2016-06-20	white	12	outside				2									18							1				1	1
2016-06-20	yellow	12	outside		2		1		1		1					4						2						1
2016-06-20	blue	12	outside				2									2										1	1
2016-06-24	white	5	inside				59				2					1								1				3	1
2016-06-24	yellow	5	inside				13		1							2							3				1		1
2016-06-24	blue	5	inside				26																					2	1
2016-06-24	white	6	inside				68															1	4			1		2	2
2016-06-24	yellow	6	inside				10		1														5	2				4	1
2016-06-24	blue	6	inside				97		2																		2	2
2016-06-24	white	7	inside				128				1																1	6
2016-06-24	yellow	7	inside				13																3			1	1
2016-06-24	blue	7	inside				41																				1
2016-06-24	white	8	inside				71				1					2	1						1				1
2016-06-24	yellow	8	inside				17																7	2			1	3	1
2016-06-24	blue	8	inside				71		1							1								1				3	1
2016-06-24	white	9	outside	1			66		2			1	1			3						1	2					6
2016-06-24	yellow	9	outside	1		1	50		2		2			9		11				2		1	10			1	1	7
2016-06-24	blue	9	outside	1			63		1		1		1	1		1	1					1	3		1	1	3
2016-06-24	white	10	outside	1			32							1		5							4
2016-06-24	yellow	10	outside				47				2	1		1		10		1				1	5				1	6	3
2016-06-24	blue	10	outside			1	74							1		1	1					1	3				1	3
2016-06-24	white	11	outside	4		1	91				1			2		7	1		1			1					1	4
2016-06-24	yellow	11	outside			1	25		2			1		5		5						1	4					2	2
2016-06-24	blue	11	outside		1		47							1		4											1	1
2016-06-24	white	12	outside	12			61		1					1		5							2					1
2016-06-24	yellow	12	outside	1		3	16			1		1		10		5				1		2											3
2016-06-24	blue	12	outside	1	1		77		2		2					1						2	3	1									1
2017-04-07	white	5	inside				3		18											1
2017-04-07	yellow	5	inside				13		5		1			3														1	1
2017-04-07	blue	5	inside				5		9
2017-04-07	white	6	inside				5		8		1					1												1
2017-04-07	yellow	6	inside						8																			1
2017-04-07	blue	6	inside				15		5							1
2017-04-07	white	7	inside				34		10					1		2												1	1
2017-04-07	yellow	7	inside				5		5					1		1											1
2017-04-07	blue	7	inside				3		9					1			1					1						1
2017-04-07	white	8	inside				4		7													1						1
2017-04-07	yellow	8	inside				21		9					2		1											1
2017-04-07	blue	8	inside				2		6					1															2
2017-04-07	white	9	outside				11		11					5	1		1											2
2017-04-07	yellow	9	outside				11		17					8		4												3
2017-04-07	blue	9	outside				10		24					1
2017-04-07	white	10	outside				58		1			1		4						1								1
2017-04-07	yellow	10	outside				2		7	2				5														2
2017-04-07	blue	10	outside	2			4		6					1											2
2017-04-07	white	11	outside				8		5					2			3											1
2017-04-07	yellow	11	outside				9		5					15		2												1
2017-04-07	blue	11	outside				17		5	1				2														1
2017-04-07	white	12	outside	1			11		27								1						1
2017-04-07	yellow	12	outside				41		15					2		1	1						1					1
2017-04-07	blue	12	outside				5		45					5														2
2017-04-10	white	5	inside				6		9																			1
2017-04-10	yellow	5	inside				4		7	1																		2
2017-04-10	blue	5	inside				2		3			1		1		2	1					1
2017-04-10	white	6	inside				4		1													1					1		1
2017-04-10	yellow	6	inside				3		8		2																1		1
2017-04-10	blue	6	inside				12		8		1			1														3
2017-04-10	white	7	inside				15		3													1
2017-04-10	yellow	7	inside				2		3		1			2		1			1						1		2
2017-04-10	blue	7	inside						3										1			1
2017-04-10	white	8	inside				4		6																			2
2017-04-10	yellow	8	inside				4		1					1								1					1	1
2017-04-10	blue	8	inside				7		3							1								1				1
2017-04-10	white	9	outside				5		11								1	1	1			2					1
2017-04-10	yellow	9	outside				3		6		3			2								3					1	2
2017-04-10	blue	9	outside				3		7	1												2		1				2
2017-04-10	white	10	outside				7		3		1					2						1						2
2017-04-10	yellow	10	outside				35		5		1			2		3												1
2017-04-10	blue	10	outside				1		3							1	2										1
2017-04-10	white	11	outside				19		5		1					1						1		1	1			1
2017-04-10	yellow	11	outside				3		4					9		1												1
2017-04-10	blue	11	outside				1		5		1			1													1	2				1
2017-04-10	white	12	outside				18		5		1	2		2			1					3						1
2017-04-10	yellow	12	outside			1	12		27			1		1	1		3											3
2017-04-10	blue	12	outside				20		18		1	1					2					1						4
2017-04-13	white	5	inside				8		6					3								1
2017-04-13	yellow	5	inside				2							1
2017-04-13	blue	5	inside				6		6
2017-04-13	white	6	inside				20		4																1			1	1
2017-04-13	yellow	6	inside						8		1																	1
2017-04-13	blue	6	inside				3		5																			2	1
2017-04-13	white	7	inside				17		7																		2
2017-04-13	yellow	7	inside						11			2		1										1			1					1
2017-04-13	blue	7	inside				3		20		2																1
2017-04-13	white	8	inside				3		5																			1
2017-04-13	yellow	8	inside				14		17														1				1	3
2017-04-13	blue	8	inside				5		12																		1	1						1
2017-04-13	white	9	outside	1			10		8		1			1								1					2	2
2017-04-13	yellow	9	outside				6		20		2			4			3						2					1
2017-04-13	blue	9	outside				2		30				1				1					2	1										1
2017-04-13	white	10	outside				19		18			2		1												1
2017-04-13	yellow	10	outside				52		7	2				5		1									1
2017-04-13	blue	10	outside				1		22		1	2
2017-04-13	white	11	outside				22		3		1	2																1
2017-04-13	yellow	11	outside				66		2		1			5			2											2
2017-04-13	blue	11	outside				2		13		1						2										1		1				1
2017-04-13	white	12	outside				20		45				1	1			1								2			2
2017-04-13	yellow	12	outside				20		21		1	2		5											1			3
2017-04-13	blue	12	outside				12		13																			2
2017-04-18	white	5	inside	3			7		12																				1
2017-04-18	yellow	5	inside				1		6					1
2017-04-18	blue	5	inside	1			3		10														1
2017-04-18	white	6	inside	1			7		7		1																	1
2017-04-18	yellow	6	inside	1			7		8		1			1
2017-04-18	blue	6	inside	2			1		10																		1
2017-04-18	white	7	inside	2			2		4	1	1
2017-04-18	yellow	7	inside				1		9
2017-04-18	blue	7	inside	1			7		6													1	1
2017-04-18	white	8	inside	2			26		6
2017-04-18	yellow	8	inside				2		12					1
2017-04-18	blue	8	inside	1					7
2017-04-18	white	9	outside	14			9		10					1
2017-04-18	yellow	9	outside				7		21		1	1		2
2017-04-18	blue	9	outside	1			2		61					1
2017-04-18	white	10	outside	4			2		6					1														1
2017-04-18	yellow	10	outside	1			19		7					1									1				1
2017-04-18	blue	10	outside	1			4		33	1												1	2
2017-04-18	white	11	outside	4			7				1			2			1
2017-04-18	yellow	11	outside	2			3		9																			1
2017-04-18	blue	11	outside	1			8		5	1		1		2									2					1
2017-04-18	white	12	outside	2			14		5		1		1										1
2017-04-18	yellow	12	outside	4			6		16					2			2
2017-04-18	blue	12	outside				3		14			1					2
2017-04-21	white	5	inside	2					1
2017-04-21	yellow	5	inside	1
2017-04-21	blue	5	inside	1			1		3								1
2017-04-21	white	6	inside	2			2		1
2017-04-21	yellow	6	inside						5
2017-04-21	blue	6	inside	1			2
2017-04-21	white	7	inside						1
2017-04-21	yellow	7	inside	1			2		8																		1
2017-04-21	blue	7	inside						2									1							1
2017-04-21	white	8	inside				1		1
2017-04-21	yellow	8	inside				3		1
2017-04-21	blue	8	inside				2		2
2017-04-21	white	9	outside	6			20		1
2017-04-21	yellow	9	outside	1			6		1
2017-04-21	blue	9	outside	1			1		6
2017-04-21	white	10	outside	3			10		1					1
2017-04-21	yellow	10	outside	2			2		5
2017-04-21	blue	10	outside	2			2		3
2017-04-21	white	11	outside	1			3
2017-04-21	yellow	11	outside	2			4		1					1
2017-04-21	blue	11	outside	1			2		2
2017-04-21	white	12	outside				4		2
2017-04-21	yellow	12	outside				5		3
2017-04-21	blue	12	outside				2		3
2017-04-24	white	5	inside	3			10		4	1													1
2017-04-24	yellow	5	inside	5			1		3					4															1
2017-04-24	blue	5	inside				3		4					1				1					1
2017-04-24	white	6	inside	3			22		6							1
2017-04-24	yellow	6	inside				6		5							1
2017-04-24	blue	6	inside				1		3					1		2
2017-04-24	white	7	inside	7			3		4		2			1		2
2017-04-24	yellow	7	inside	1			6		4		1			1									1		1			2
2017-04-24	blue	7	inside				24		3							2	1
2017-04-24	white	8	inside	6			10		6					1											1
2017-04-24	yellow	8	inside	5			6		5		1			2
2017-04-24	blue	8	inside				29		1							2						1
2017-04-24	white	9	outside	47			13		13	2		1	1	10		3
2017-04-24	yellow	9	outside	17			13		13					1			1						1
2017-04-24	blue	9	outside	6			20		28							1	1
2017-04-24	white	10	outside	53			11		7	1						3	1
2017-04-24	yellow	10	outside	17			52		6					9		1	1						1
2017-04-24	blue	10	outside	14			11		21	1						1	1											1		1
2017-04-24	white	11	outside		6		14		3		1						3						1		1			2
2017-04-24	yellow	11	outside	28			34		5			1		6		2							1
2017-04-24	blue	11	outside	2			63		9	1
2017-04-24	white	12	outside				17		10		1		1			1	2								1			4
2017-04-24	yellow	12	outside				17		7			2
2017-04-24	blue	12	outside				15		7								1						1
2017-04-28	white	5	inside	1			5		3							4
2017-04-28	yellow	5	inside	1			2							1
2017-04-28	blue	5	inside				3
2017-04-28	white	6	inside	1			4					1		1		1
2017-04-28	yellow	6	inside				2		4							1							1					1
2017-04-28	blue	6	inside				2		3							3										1						1
2017-04-28	white	7	inside				16				1						1											1
2017-04-28	yellow	7	inside				1		2
2017-04-28	blue	7	inside				3		3
2017-04-28	white	8	inside	1			10		2	1	1																	3
2017-04-28	yellow	8	inside				2	1	3		2												1					1
2017-04-28	blue	8	inside				1		3
2017-04-28	white	9	outside	21			3		3								1					1						2
2017-04-28	yellow	9	outside	1			4		1							11							1
2017-04-28	blue	9	outside		4		2		2		1			1								1						1
2017-04-28	white	10	outside	4			1									3						2
2017-04-28	yellow	10	outside	1			7				1					19							4	1				4
2017-04-28	blue	10	outside				3		4					1		2	1											1
2017-04-28	white	11	outside				6		4							6	2						1					2	1
2017-04-28	yellow	11	outside	5			8		3								4						1					6
2017-04-28	blue	11	outside				2		5		1						1											1
2017-04-28	white	12	outside	1			5				1											1	2				1
2017-04-28	yellow	12	outside				41				1												1				1
2017-04-28	blue	12	outside				5		2		1						1				1
2017-05-01	white	5	inside	11			9		6					2		2
2017-05-01	yellow	5	inside	2			1		3					1									1	1
2017-05-01	blue	5	inside				5		9
2017-05-01	white	6	inside	3			3		2							1											1
2017-05-01	yellow	6	inside				7		2		1			3		1											1
2017-05-01	blue	6	inside				10		4		1												1
2017-05-01	white	7	inside	2			7		1		1					3						1
2017-05-01	yellow	7	inside	3			8		8							1
2017-05-01	blue	7	inside	7			3		5		1			1			1						1					1
2017-05-01	white	8	inside	5			20		2							3							1
2017-05-01	yellow	8	inside	7			7		7					2		3	1
2017-05-01	blue	8	inside	3			9		2
2017-05-01	white	9	outside	20			19		12					1		19	1											2
2017-05-01	yellow	9	outside	15			26	1	8			1		2		4							2							1
2017-05-01	blue	9	outside	21			7		19		1					3							2
2017-05-01	white	10	outside	16			40		7					3		3							3					1
2017-05-01	yellow	10	outside	26			10		8		1					4												1									1
2017-05-01	blue	10	outside	5			10		8		1
2017-05-01	white	11	outside	8			14		11		1					1						1
2017-05-01	yellow	11	outside	1			50		7		1			1									1					2
2017-05-01	blue	11	outside	9	1		7		4								1						1					1
2017-05-01	white	12	outside	19			32		17					2		4	2
2017-05-01	yellow	12	outside	3			13		16			1					2						3					1
2017-05-01	blue	12	outside				10		5		2												1																			trap visited by birds
2017-05-05	white	5	inside				5		11
2017-05-05	yellow	5	inside	1			8		3							1							4				1		1
2017-05-05	blue	5	inside	2			3		3		1			1
2017-05-05	white	6	inside	6			16		7		2											1						1
2017-05-05	yellow	6	inside	2			7		4		2			2		1							1					1
2017-05-05	blue	6	inside				3		8		2					2	1											1
2017-05-05	white	7	inside	4			5		3							1
2017-05-05	yellow	7	inside	1			9		2		1			1									1					1
2017-05-05	blue	7	inside	1			3		4			1
2017-05-05	white	8	inside	6			9		4		1			1													1
2017-05-05	yellow	8	inside	3			3		8																1
2017-05-05	blue	8	inside	1			15		10																				2
2017-05-05	white	9	outside	116			78		8					5		4							3					1
2017-05-05	yellow	9	outside	13			24	1	6														1			1		2
2017-05-05	blue	9	outside	10			12		17		1			2									1					1
2017-05-05	white	10	outside	11			8		7		2					1	1						1					1
2017-05-05	yellow	10	outside	8			9		8		1			2		2
2017-05-05	blue	10	outside	2			15		9		1												1					1
2017-05-05	white	11	outside	16			3		10					2									3				1	2
2017-05-05	yellow	11	outside	6			22		13		2			1	1	1	1						2
2017-05-05	blue	11	outside	16			5		8
2017-05-05	white	12	outside	4			38		16		1						1						2				2
2017-05-05	yellow	12	outside	2			51		3		1			1		2							2
2017-05-05	blue	12	outside	1			9		8																			1	1
2017-05-08	white	5	inside	4			3		5					1		7												1
2017-05-08	yellow	5	inside	1			6		2					1		2												2	1
2017-05-08	blue	5	inside	2			2		2							1												1
2017-05-08	white	6	inside	3			9		6
2017-05-08	yellow	6	inside	3			2	1	2					1		2							1				1
2017-05-08	blue	6	inside	3			8		4																			1
2017-05-08	white	7	inside	2			5		2								1													1
2017-05-08	yellow	7	inside				13		7		2			2		2
2017-05-08	blue	7	inside				17		7							1											1
2017-05-08	white	8	inside	5			10		5		2						1					1
2017-05-08	yellow	8	inside	2			8		5	1				1		2												1
2017-05-08	blue	8	inside				8		3					2		2
2017-05-08	white	9	outside	25			27		4	1				1		39						1						1
2017-05-08	yellow	9	outside	7			9		14					1		3	3						1					1
2017-05-08	blue	9	outside	7			11		6							10	1						1				1	1
2017-05-08	white	10	outside	8		1	25		1							18						2	1					1
2017-05-08	yellow	10	outside	3			9	1	13					1		5	1					1	1				1	3
2017-05-08	blue	10	outside	2			7		8	1						3	1											2
2017-05-08	white	11	outside	10			13		2	1	1					3	1						3						2
2017-05-08	yellow	11	outside	18			10		8			1		2		1	1
2017-05-08	blue	11	outside	1			14		9							4	1					1						3
2017-05-08	white	12	outside			1	75		3							2	2					1	3				1	1
2017-05-08	yellow	12	outside	1			14		7					1	1	1		1	1				2
2017-05-08	blue	12	outside	2			12		17		1					3	1						1			1			1
2017-05-12	white	5	inside				14		8		2	2		2		3	1											1
2017-05-12	yellow	5	inside				6		2		3																1	1
2017-05-12	blue	5	inside				8		1							2	3
2017-05-12	white	6	inside	1			20		2		2			1		3							1	1			2	2
2017-05-12	yellow	6	inside	2			5		5		4					1	1						1
2017-05-12	blue	6	inside	2			3		3		1	2																1	1
2017-05-12	white	7	inside				16		7		2					5													1
2017-05-12	yellow	7	inside				5		10		9					1	1					2	2		1			1
2017-05-12	blue	7	inside				17		3		2					5	1										1
2017-05-12	white	8	inside	3			15		3		1			2		1							1					2
2017-05-12	yellow	8	inside	8			13		7		1			2		2							2					2
2017-05-12	blue	8	inside				16		8							1							1
2017-05-12	white	9	outside	24	1		53				1			5		49	1					2	1					2
2017-05-12	yellow	9	outside	6			18	1	13		1			1		1	2					2	2
2017-05-12	blue	9	outside	12			26		17					1		8						1					1	2
2017-05-12	white	10	outside	3			83		4		1			1		1						2						2
2017-05-12	yellow	10	outside	4			17		6		1	1		1		1						1	1		2			1							1
2017-05-12	blue	10	outside		1		17		6		2			1								1						1
2017-05-12	white	11	outside	4			41		7		1				1	6	4											1
2017-05-12	yellow	11	outside	1			30							3		1														1
2017-05-12	blue	11	outside				51		2		1			1		3	2											2
2017-05-12	white	12	outside				14	1	1		1					1							3
2017-05-12	yellow	12	outside	1		1	37		3		1	1		1	1								2					1
2017-05-12	blue	12	outside	3			54		10		1	3			1	1	3					2	5				2	1		1
2017-05-15	white	5	inside				62		3		2			1														2	1
2017-05-15	yellow	5	inside				14		1					2									1				1	3	1
2017-05-15	blue	5	inside				34		7																			1
2017-05-15	white	6	inside				58		10		1											1					1	3
2017-05-15	yellow	6	inside				17		6		4			1		1						1	3	1				3
2017-05-15	blue	6	inside				36		5		3						1											1
2017-05-15	white	7	inside	1			53		5		1					5							1				1	4
2017-05-15	yellow	7	inside				20		6		2			2		4							1				1	4							1
2017-05-15	blue	7	inside				21		5							1											2	3		1
2017-05-15	white	8	inside				60		4		1	1		1		1		1		1			1					3
2017-05-15	yellow	8	inside				20		5		1			1		5												3
2017-05-15	blue	8	inside				53		3																			1
2017-05-15	white	9	outside		2		105		7		2			10		5	1						3				1	4	1
2017-05-15	yellow	9	outside				24		3					4	1	2						1	2				1
2017-05-15	blue	9	outside				64		4		3			2		1	2					3	1				1	6
2017-05-15	white	10	outside		1		62		4					3		2						1						4
2017-05-15	yellow	10	outside	2			30		8	1	3			6	1		2						4					4
2017-05-15	blue	10	outside				17		5		4	1					3					1	4					1
2017-05-15	white	11	outside				62		5					2		10						3	5		1			7
2017-05-15	yellow	11	outside				20		5		1			1	1		3					2	1						1
2017-05-15	blue	11	outside	1			16		6		3					1	4					3	2				1	1
2017-05-15	white	12	outside				62		2			1		1			3										1	3
2017-05-15	yellow	12	outside		5		21		6		3			1			3					2	2					1
2017-05-15	blue	12	outside			1	6		2													1	1	1				1		2
2018-04-09	white	5	inside				1		2					1		5	1						1				2
2018-04-09	yellow	5	inside	1			1		7		1			2		1
2018-04-09	blue	5	inside				2							1		4						1					1
2018-04-09	white	6	inside				2		1		1			1			1										1
2018-04-09	yellow	6	inside				2		3							1						1	1				2	1
2018-04-09	blue	6	inside						2					1		2												2
2018-04-09	white	7	inside				3		6		1					3						1
2018-04-09	yellow	7	inside				1		4	1				4		3											4
2018-04-09	blue	7	inside						1							3											3	3
2018-04-09	white	8	inside				4		3		1					9												4	1
2018-04-09	yellow	8	inside				2		4					1		2											1
2018-04-09	blue	8	inside				3		2		1	1		5		6												2	1
2018-04-09	white	9	outside				4		2					1		1											1
2018-04-09	yellow	9	outside				4							8								2						1
2018-04-09	blue	9	outside				2		1					2		3												1
2018-04-09	white	10	outside				2		1		1			4	1													1
2018-04-09	yellow	10	outside				2				1			16	1	4						2	1
2018-04-09	blue	10	outside				1		1			1		2		4
2018-04-09	white	11	outside				1		1					47		1						2							1
2018-04-09	yellow	11	outside				4		1			1		6		2
2018-04-09	blue	11	outside				2		1			3		1			1
2018-04-09	white	12	outside				39		3		2			1			2					2						2
2018-04-09	yellow	12	outside				11		5					6			1					2
2018-04-09	blue	12	outside				4		4					7		1	1			2																			1
2018-04-13	white	5	inside				2		2			1				2	1										1
2018-04-13	yellow	5	inside				1		2							1											2	1
2018-04-13	blue	5	inside						2			1		1													1	1
2018-04-13	white	6	inside				1		2					5		1												2	1
2018-04-13	yellow	6	inside				3		2	1				10		1													1
2018-04-13	blue	6	inside				3		2					1		1											4	1
2018-04-13	white	7	inside				1									3							1				2	1
2018-04-13	yellow	7	inside											5													2
2018-04-13	blue	7	inside						1		1			2		1											2
2018-04-13	white	8	inside				2		2					2		4												1
2018-04-13	yellow	8	inside						4					8		1												1
2018-04-13	blue	8	inside						1			1		4		1
2018-04-13	white	9	outside				2		7	1	1			3		1												1
2018-04-13	yellow	9	outside				5		10						1
2018-04-13	blue	9	outside	1			3		4	1				4														1
2018-04-13	white	10	outside				5		4	1				5		1												1		1
2018-04-13	yellow	10	outside	1			3		2		2	1		118		1
2018-04-13	blue	10	outside				1		2	1	2			14		1
2018-04-13	white	11	outside	2			5		1			1		78		2	1		1									1
2018-04-13	yellow	11	outside	1			4		5		2			8			4		1												1
2018-04-13	blue	11	outside	1			2		3					3			1						1					1
2018-04-13	white	12	outside				2		2					11
2018-04-13	yellow	12	outside				4			1				13									1
2018-04-13	blue	12	outside	1			3		4					7		1	1						1
2018-04-16	white	5	inside				2		3
2018-04-16	yellow	5	inside				2		1					1								1					1
2018-04-16	blue	5	inside				2		1
2018-04-16	white	6	inside									1										1
2018-04-16	yellow	6	inside											2														1
2018-04-16	blue	6	inside						1			1				1													1
2018-04-16	white	7	inside				2		2		1			1		1	1
2018-04-16	yellow	7	inside				1									1											1	1
2018-04-16	blue	7	inside						1		1
2018-04-16	white	8	inside				7							1		2												1
2018-04-16	yellow	8	inside						3					4		1												3
2018-04-16	blue	8	inside						2					1		2
2018-04-16	white	9	outside	2			2		1					3
2018-04-16	yellow	9	outside				5		7		2			1			1										3				1
2018-04-16	blue	9	outside				2		2				1	4													1
2018-04-16	white	10	outside				1		1					1
2018-04-16	yellow	10	outside				1		1					34	2												1
2018-04-16	blue	10	outside				3
2018-04-16	white	11	outside				1					1		118
2018-04-16	yellow	11	outside				1		3		1						2					1	1					1
2018-04-16	blue	11	outside				3		10					1
2018-04-16	white	12	outside				4		2			1		3
2018-04-16	yellow	12	outside				2		2		2	1		6	1							1	1
2018-04-16	blue	12	outside				1		1					3			1											1
2018-04-20	white	5	inside				2		2		1			1	1	1												1
2018-04-20	yellow	5	inside				1		2																			1
2018-04-20	blue	5	inside				2		3		2					1						1
2018-04-20	white	6	inside				1		2					1								1					1
2018-04-20	yellow	6	inside				3		-		1			2															1
2018-04-20	blue	6	inside				1		3																			1
2018-04-20	white	7	inside				2		2			2			1	1						1
2018-04-20	yellow	7	inside				2		6	1							1
2018-04-20	blue	7	inside						2								1										1
2018-04-20	white	8	inside				4		2		2			3		3												1
2018-04-20	yellow	8	inside				2		3													1						1
2018-04-20	blue	8	inside				1		1					1														2
2018-04-20	white	9	outside				4			1		1		3		6											1	3
2018-04-20	yellow	9	outside				2			1	1			1			1		1									6
2018-04-20	blue	9	outside				2		5	3	1	1		1		1	2						1
2018-04-20	white	10	outside						1	1						1
2018-04-20	yellow	10	outside				1		1	1	1	1		17				2		1
2018-04-20	blue	10	outside				2		1	2		2		1		1	1
2018-04-20	white	11	outside				2		1		1			10								1						1
2018-04-20	yellow	11	outside				1		3					1
2018-04-20	blue	11	outside	1			1		1		1	1					1					1					1											1
2018-04-20	white	12	outside				15		3		2			2										1			1	1
2018-04-20	yellow	12	outside				3		4					5			2											1
2018-04-20	blue	12	outside						5			1					1																								1
2018-04-23	white	5	inside	1			1		1							1	1
2018-04-23	yellow	5	inside						1													1						1
2018-04-23	blue	5	inside				1			1						2
2018-04-23	white	6	inside				4															1
2018-04-23	yellow	6	inside									1																	1
2018-04-23	blue	6	inside				1		1	1
2018-04-23	white	7	inside				3			1
2018-04-23	yellow	7	inside				12		3
2018-04-23	blue	7	inside				3		3							1
2018-04-23	white	8	inside				16		3	1						1
2018-04-23	yellow	8	inside				2			1	1
2018-04-23	blue	8	inside				1				1					1												1
2018-04-23	white	9	outside				3				1			1		4						1						1
2018-04-23	yellow	9	outside						2		1									1
2018-04-23	blue	9	outside				4		2							1	1					1
2018-04-23	white	10	outside				2		4		1	1											1				1
2018-04-23	yellow	10	outside				2		2	1	1	1										2					1
2018-04-23	blue	10	outside				1		2													2					1
2018-04-23	white	11	outside				1		1		1											1				1
2018-04-23	yellow	11	outside				2					2								1									1
2018-04-23	blue	11	outside				2		2					1					1			1						1	1
2018-04-23	white	12	outside				2		1
2018-04-23	yellow	12	outside						2	1	1												1
2018-04-23	blue	12	outside				2		3																		1
2018-04-27	white	5	inside	1			3		2							8							2
2018-04-27	yellow	5	inside				2		3					2															1
2018-04-27	blue	5	inside				1		3		1
2018-04-27	white	6	inside				7		1		2
2018-04-27	yellow	6	inside				3	1			1	1
2018-04-27	blue	6	inside				11		3							3	1											1
2018-04-27	white	7	inside				3		4
2018-04-27	yellow	7	inside	1			37		3					1
2018-04-27	blue	7	inside	1			8		2		1	1				1
2018-04-27	white	8	inside				44		4		1					9
2018-04-27	yellow	8	inside				4				2			3
2018-04-27	blue	8	inside				2		3							1	1											2
2018-04-27	white	9	outside	2			35		7	1				2		23							1	1					1
2018-04-27	yellow	9	outside				4		5			1		3			1										1			1	1
2018-04-27	blue	9	outside				5		4		1					1
2018-04-27	white	10	outside	2			6		5		1			1		6	1						1				1		1
2018-04-27	yellow	10	outside				6		3		2			1
2018-04-27	blue	10	outside						5		1			1		2	1										2
2018-04-27	white	11	outside				8		5		3			2		1			1
2018-04-27	yellow	11	outside				3		9					1								1																				trap visited by birds
2018-04-27	blue	11	outside				1		4			1							1								1	1	1
2018-04-27	white	12	outside				4		4							2							1
2018-04-27	yellow	12	outside				9		2		2						1
2018-04-27	blue	12	outside	1			7		4					1
2018-04-30	white	5	inside	1			3		1		1			1		17									1				1
2018-04-30	yellow	5	inside				3	1						2		2													1
2018-04-30	blue	5	inside				3		3							2
2018-04-30	white	6	inside				11		7	1	1			1		2													1
2018-04-30	yellow	6	inside	1			3				1																		1
2018-04-30	blue	6	inside				12		2							8
2018-04-30	white	7	inside				3		2		1					2														1
2018-04-30	yellow	7	inside				22	1	1					1		1							1
2018-04-30	blue	7	inside				5		3							8												2
2018-04-30	white	8	inside				17				1					32							1
2018-04-30	yellow	8	inside				7	1	3		2			1		4							1						1
2018-04-30	blue	8	inside				1									1		1					1
2018-04-30	white	9	outside				45		4		2			1		61							1				2
2018-04-30	yellow	9	outside			1	3		2		3			2														1
2018-04-30	blue	9	outside	2					4		1			1		4							1
2018-04-30	white	10	outside				2		2		1					5									1
2018-04-30	yellow	10	outside	1			26		4			1		1		4																			1
2018-04-30	blue	10	outside				3		5		1					5						1							1
2018-04-30	white	11	outside	4			6		1		2			1		7	2						1
2018-04-30	yellow	11	outside	1			4		2		1			4		1
2018-04-30	blue	11	outside	1					3		1			2		1							1
2018-04-30	white	12	outside				7		2							2	1					1																				trap visited by birds
2018-04-30	yellow	12	outside				10		3														1		1				1
2018-04-30	blue	12	outside				3		4					1		1						1
2018-05-04	white	5	inside	3			4		1					1									1						1
2018-05-04	yellow	5	inside				4	3	6		2					1
2018-05-04	blue	5	inside						2
2018-05-04	white	6	inside					2	4
2018-05-04	yellow	6	inside				1		4
2018-05-04	blue	6	inside				1		1																			1
2018-05-04	white	7	inside				1																1				1		1
2018-05-04	yellow	7	inside				10				1					1
2018-05-04	blue	7	inside				6		6
2018-05-04	white	8	inside	1			8		3							2							1
2018-05-04	yellow	8	inside				1		5	1
2018-05-04	blue	8	inside				1		2							2
2018-05-04	white	9	outside	7			37		2					1		5
2018-05-04	yellow	9	outside				4		2			1											2		1			1
2018-05-04	blue	9	outside				4		2
2018-05-04	white	10	outside	5			6		6			1		1									1
2018-05-04	yellow	10	outside				5									3													1
2018-05-04	blue	10	outside				1		1			1		2		1
2018-05-04	white	11	outside	2			2		3				1	1		1							1
2018-05-04	yellow	11	outside	1					3
2018-05-04	blue	11	outside				1		1			1
2018-05-04	white	12	outside				13
2018-05-04	yellow	12	outside				2					1		1
2018-05-04	blue	12	outside						2		1												1
2018-05-07	white	5	inside				6		1					1		19							2
2018-05-07	yellow	5	inside				3		3					2		5													1
2018-05-07	blue	5	inside						1							3
2018-05-07	white	6	inside				3		1		1												1
2018-05-07	yellow	6	inside	1			1		1														1
2018-05-07	blue	6	inside				4									5
2018-05-07	white	7	inside				3		1
2018-05-07	yellow	7	inside				17									1
2018-05-07	blue	7	inside				10		1							6	1												1
2018-05-07	white	8	inside				35		3							42												1	1
2018-05-07	yellow	8	inside				7	1	1					3		6							1
2018-05-07	blue	8	inside				7	1	4		1					3
2018-05-07	white	9	outside				3		2							2											1
2018-05-07	yellow	9	outside				5				2					1	1					1						1
2018-05-07	blue	9	outside	1			5		3							4							1	2				1
2018-05-07	white	10	outside	4			10		1	1						13	1						1				1
2018-05-07	yellow	10	outside	3			12		1		2			1		26						1						1			1
2018-05-07	blue	10	outside				2		3			1	1			19						3	2
2018-05-07	white	11	outside	1			5										2						2					1														trap visited by birds
2018-05-07	yellow	11	outside				5		1		1	2		1		1	1					1	1					1														trap visited by birds
2018-05-07	blue	11	outside				3		3							2	1						1																			trap visited by birds
2018-05-07	white	12	outside	1			34		1		1					1
2018-05-07	yellow	12	outside			1	6		2		1				1
2018-05-07	blue	12	outside				1		3		1												1
2019-04-08	white	5	inside				2		1					8
2019-04-08	yellow	5	inside	1			3		1					4
2019-04-08	blue	5	inside				5		2		1			1
2019-04-08	white	6	inside						2					3		1
2019-04-08	yellow	6	inside				2		2					11						1
2019-04-08	blue	6	inside				2		1					3		1
2019-04-08	white	7	inside						2					3		1						1							1
2019-04-08	yellow	7	inside				2		2		1			8		4
2019-04-08	blue	7	inside						1							1												1
2019-04-08	white	8	inside				1		1					24		2												1
2019-04-08	yellow	8	inside				3		1					7		1
2019-04-08	blue	8	inside				1		3					12		1													1
2019-04-08	white	9	outside	2			9		3	1				7		1
2019-04-08	yellow	9	outside	1			7		3			1		2		2										1		1
2019-04-08	blue	9	outside	2			8		2					9		2												1
2019-04-08	white	10	outside				6		1					11								1						1
2019-04-08	yellow	10	outside	2			11		7	1		1		13		3												3
2019-04-08	blue	10	outside				1		1								1	1
2019-04-08	white	11	outside				3		3	1				6														1														trap visited by birds
2019-04-08	yellow	11	outside	1			4		3					2										1																		trap visited by birds
2019-04-08	blue	11	outside						2					1																												trap visited by birds
2019-04-08	white	12	outside				6				1			1			1											1
2019-04-08	yellow	12	outside				3		3					1		1												2
2019-04-08	blue	12	outside	1			1		1
2019-04-12	white	5	inside				3		1							1
2019-04-12	yellow	5	inside				1							2
2019-04-12	blue	5	inside				5		3																			1
2019-04-12	white	6	inside				1
2019-04-12	yellow	6	inside				2							1		1
2019-04-12	blue	6	inside											1														1
2019-04-12	white	7	inside				2
2019-04-12	yellow	7	inside						1							5
2019-04-12	blue	7	inside													1						1						1
2019-04-12	white	8	inside				1		2							2
2019-04-12	yellow	8	inside				2		2					1		2
2019-04-12	blue	8	inside				4		2					1
2019-04-12	white	9	outside	1			22		1					1														1
2019-04-12	yellow	9	outside				12		6	2				1		1	1
2019-04-12	blue	9	outside			1	24		1			2				1												2
2019-04-12	white	10	outside	2		1	3		2					31		1
2019-04-12	yellow	10	outside				8		1					14		1												2
2019-04-12	blue	10	outside				7		4					1
2019-04-12	white	11	outside											1								1
2019-04-12	yellow	11	outside				2		2		1			2		1											1
2019-04-12	blue	11	outside				4		7					1
2019-04-12	white	12	outside				8		2																							1
2019-04-12	yellow	12	outside				7		4					2														4
2019-04-12	blue	12	outside				5		2																			1
2019-04-15	white	5	inside
2019-04-15	yellow	5	inside
2019-04-15	blue	5	inside
2019-04-15	white	6	inside
2019-04-15	yellow	6	inside
2019-04-15	blue	6	inside
2019-04-15	white	7	inside				3							1
2019-04-15	yellow	7	inside				1		2																			1
2019-04-15	blue	7	inside
2019-04-15	white	8	inside				1		2
2019-04-15	yellow	8	inside
2019-04-15	blue	8	inside				3		1																			1
2019-04-15	white	9	outside
2019-04-15	yellow	9	outside
2019-04-15	blue	9	outside
2019-04-15	white	10	outside
2019-04-15	yellow	10	outside	2		1	1							9
2019-04-15	blue	10	outside	1			2		2					4
2019-04-15	white	11	outside						1					3									1
2019-04-15	yellow	11	outside				3		3					1														1
2019-04-15	blue	11	outside
2019-04-15	white	12	outside
2019-04-15	yellow	12	outside											2
2019-04-15	blue	12	outside
2019-04-18	white	5	inside				11		6	3				4		2						2						3
2019-04-18	yellow	5	inside				4		3		1			3														2		1
2019-04-18	blue	5	inside				3		3		1			2														4
2019-04-18	white	6	inside				7		2		1					2	1					2						4	1
2019-04-18	yellow	6	inside				2		2					34														2
2019-04-18	blue	6	inside				17		1	1				1														5		1
2019-04-18	white	7	inside				2		1	1				3		2												2
2019-04-18	yellow	7	inside				9		3					14		2												1
2019-04-18	blue	7	inside				7				1																	3
2019-04-18	white	8	inside				29			3		1		11		3												1	1
2019-04-18	yellow	8	inside				5		6	1	1			2		2												5
2019-04-18	blue	8	inside						2		2			4		2												1
2019-04-18	white	9	outside				28		2			1		14								2						7
2019-04-18	yellow	9	outside	2			19		8		4	1		10			2						1					17
2019-04-18	blue	9	outside			1	20		8			3		8								2						16	1
2019-04-18	white	10	outside				7		2		1	3		11	1	1						2						1
2019-04-18	yellow	10	outside				15		2	1		1		26	1	3												2
2019-04-18	blue	10	outside				3		4			3		2			3					1						6
2019-04-18	white	11	outside				7		1		1			13		1		2				1						6
2019-04-18	yellow	11	outside				7		3					11			2	2										7
2019-04-18	blue	11	outside				6		8		1	2		7				1								1		6
2019-04-18	white	12	outside				14		8					2		4						1					2	6	1
2019-04-18	yellow	12	outside				18		1		1			18		1	1					1						9
2019-04-18	blue	12	outside	1			7		4			1		16			2					2	1					10	1
2019-04-23	white	5	inside				13		2	3	1			4		3
2019-04-23	yellow	5	inside				2		3					1			1					2						5
2019-04-23	blue	5	inside				3		2	1	1					1						2						3			1	1
2019-04-23	white	6	inside				8				2			1														1
2019-04-23	yellow	6	inside				2				1			36			1							1				2
2019-04-23	blue	6	inside				17				1	1																3
2019-04-23	white	7	inside				3			3				6				1	1			2						2	2
2019-04-23	yellow	7	inside				7	1	3		2			17			2											6
2019-04-23	blue	7	inside				6		3		2					2						1						7	1
2019-04-23	white	8	inside				18		5	1				28		13	1					7						2
2019-04-23	yellow	8	inside				1	1	3		2			8		1	1					2
2019-04-23	blue	8	inside				4		1		2	1					2											3	2
2019-04-23	white	9	outside	1			6		4	3	1			20		22	3	3				11						13
2019-04-23	yellow	9	outside				8		2		8	1		10		2	3	1	1			2		1				20	1
2019-04-23	blue	9	outside				3		6	1	1	3		16		4	1					1		1				11
2019-04-23	white	10	outside				10		8	2	2			1		11	1		1			1						5
2019-04-23	yellow	10	outside				13		14	1	3			8	1	3						3		2				9
2019-04-23	blue	10	outside				4		3								2	1				1						3
2019-04-23	white	11	outside				10		2								3	1					1						1													trap visited by birds
2019-04-23	yellow	11	outside				11		6	1		3		1			8	1	1			2				1		17														trap visited by birds
2019-04-23	blue	11	outside	1			8		4		1			1			2	1				1	1					4	1													trap visited by birds
2019-04-23	white	12	outside				10		6		1			1			4	1				2	2					9	1
2019-04-23	yellow	12	outside				9		8		5			29			9					1						12	2
2019-04-23	blue	12	outside				7		5			1		10			7					4		1				8	1
2019-04-26	white	5	inside				20		3		2			1		4	1					1
2019-04-26	yellow	5	inside				17		4		1			3					1			2	1					1
2019-04-26	blue	5	inside				2		8		1					1												1
2019-04-26	white	6	inside				7		6	1				2		1												3	1
2019-04-26	yellow	6	inside				2		5		1					2				1
2019-04-26	blue	6	inside				14		6		1					1	1											2
2019-04-26	white	7	inside				4		3		1			1		2
2019-04-26	yellow	7	inside				8		3		1	1		2		2							1					5
2019-04-26	blue	7	inside				8		8		3			1														2
2019-04-26	white	8	inside				20							1		5							1
2019-04-26	yellow	8	inside				11		4		3			4		6
2019-04-26	blue	8	inside				1		4		2						1		1				1			1		3
2019-04-26	white	9	outside	3			11		2		2			5		8	2	1		1		2						8
2019-04-26	yellow	9	outside	1			5		6	1	2			12		11				1								7
2019-04-26	blue	9	outside				3		2							1	1	1					1					7
2019-04-26	white	10	outside	1			3		1		1			1		8							3	1				3
2019-04-26	yellow	10	outside				4		3		2																1	2
2019-04-26	blue	10	outside				8		5													1	1					1
2019-04-26	white	11	outside				8		7									1	2									8
2019-04-26	yellow	11	outside	1			6		3		3			4			6		1				1					13
2019-04-26	blue	11	outside				3		3			1			1				1				1	1				2														trap visited by birds
2019-04-26	white	12	outside	1			19		1	1				2			1											2	1
2019-04-26	yellow	12	outside				7		6					11		1	1							1				6	1
2019-04-26	blue	12	outside			1	3		9					2						1			1					5
2019-04-29	white	5	inside				22	1	10		1
2019-04-29	yellow	5	inside	2			23	1	9		1			1
2019-04-29	blue	5	inside				1		8			1
2019-04-29	white	6	inside				6		15							1
2019-04-29	yellow	6	inside				3		8								1
2019-04-29	blue	6	inside				2
2019-04-29	white	7	inside				12		12
2019-04-29	yellow	7	inside				5		11
2019-04-29	blue	7	inside				5		16										1									1
2019-04-29	white	8	inside				49		12					1		1													1
2019-04-29	yellow	8	inside				4	1	11							5
2019-04-29	blue	8	inside				2		6
2019-04-29	white	9	outside	5			12		6							1		1
2019-04-29	yellow	9	outside				4		3					2											1			1
2019-04-29	blue	9	outside				6		10			1							1
2019-04-29	white	10	outside	4			5		7																			1
2019-04-29	yellow	10	outside				6		11					1
2019-04-29	blue	10	outside				5		18
2019-04-29	white	11	outside	10			2		12		2																	3	1
2019-04-29	yellow	11	outside	2			3		7					1														1		1
2019-04-29	blue	11	outside	2
2019-04-29	white	12	outside				7		7
2019-04-29	yellow	12	outside				4
2019-04-29	blue	12	outside	1			11		5																			1
2019-05-03	white	5	inside				89		5					2		7	1
2019-05-03	yellow	5	inside				11		12		1			4			1
2019-05-03	blue	5	inside	2			1	1	1			1
2019-05-03	white	6	inside				8		9							1							1					5
2019-05-03	yellow	6	inside				4		6		2			6				1										1
2019-05-03	blue	6	inside	2			36		8	1						3												3
2019-05-03	white	7	inside				4	1	5
2019-05-03	yellow	7	inside				5		1					2		1							1					3	1
2019-05-03	blue	7	inside				5		10		2																	1
2019-05-03	white	8	inside				116	2	4					3		23						1						1
2019-05-03	yellow	8	inside				8	1	5					2
2019-05-03	blue	8	inside	1			58		8							9						1						4
2019-05-03	white	9	outside	10			17		4		1					9												2
2019-05-03	yellow	9	outside				4		12	1		4				4						1						7	1
2019-05-03	blue	9	outside	2			6		8		1	1				6	1							1	1			5
2019-05-03	white	10	outside	6			4		3		1			1		13	1								1			2
2019-05-03	yellow	10	outside	2			9		5		5	1		1		10		1					1		1			4	1
2019-05-03	blue	10	outside				6		4							1						1						1
2019-05-03	white	11	outside	13	1		9		9		1			1														1
2019-05-03	yellow	11	outside	8			13		10		1			5			2											2
2019-05-03	blue	11	outside													1
2019-05-03	white	12	outside	4			37		7			2				2											1	10
2019-05-03	yellow	12	outside	1			5		3		4	1		3		1												3		1
2019-05-03	blue	12	outside				1		15		2			1			2						3					10	1
2019-05-06	white	5	inside				11		1
2019-05-06	yellow	5	inside				1		2
2019-05-06	blue	5	inside						1																			2
2019-05-06	white	6	inside	1					5		1
2019-05-06	yellow	6	inside					1
2019-05-06	blue	6	inside				1	1	1																			1
2019-05-06	white	7	inside	1			1	3	1			1																1
2019-05-06	yellow	7	inside				4	1	2
2019-05-06	blue	7	inside				1		3						1
2019-05-06	white	8	inside	2			26
2019-05-06	yellow	8	inside				5		2
2019-05-06	blue	8	inside				3		2
2019-05-06	white	9	outside				11		3
2019-05-06	yellow	9	outside				1		3					1													1
2019-05-06	blue	9	outside	1			8		6							1												3
2019-05-06	white	10	outside				1		7							1
2019-05-06	yellow	10	outside						1														1
2019-05-06	blue	10	outside						5
2019-05-06	white	11	outside	3			5		1							1	1																									trap visited by birds
2019-05-06	yellow	11	outside				1		6					1		1												1														trap visited by birds
2019-05-06	blue	11	outside	2			2		2								1										1															trap visited by birds
2019-05-06	white	12	outside				2		1																			1
2019-05-06	yellow	12	outside						2			1		1														1
2019-05-06	blue	12	outside				1									1													1
2019-05-10	white	5	inside	6			96	2	1						1	3													1
2019-05-10	yellow	5	inside	1			21	6	12					3		1	1							1
2019-05-10	blue	5	inside	2			9	1	7
2019-05-10	white	6	inside	1			26	1	2							1
2019-05-10	yellow	6	inside	2			69		4
2019-05-10	blue	6	inside				5		4		2					1
2019-05-10	white	7	inside	1			1		3	1																		1
2019-05-10	yellow	7	inside	1			20	1	3					3		1												2
2019-05-10	blue	7	inside				15	2	5							1	1											1
2019-05-10	white	8	inside	1			121		3	4		1				7													1
2019-05-10	yellow	8	inside				4	1	2					1									1					1
2019-05-10	blue	8	inside				8		3	2						1												1
2019-05-10	white	9	outside	23			68		14		1			3		8
2019-05-10	yellow	9	outside	8			47		9					2		6	1											1
2019-05-10	blue	9	outside	5			28		10					2		5												1
2019-05-10	white	10	outside	11			23		7			2				2								1				1
2019-05-10	yellow	10	outside	3			15		6		1			2	1	2											1	1
2019-05-10	blue	10	outside	7			21		12		2
2019-05-10	white	11	outside	23			15		9					2			1					1		1				1
2019-05-10	yellow	11	outside	6			15		10		1			2		1	2						1					3
2019-05-10	blue	11	outside				2																						1
2019-05-10	white	12	outside	8			46		3		1																	1
2019-05-10	yellow	12	outside	3	1		33		3		1	1		4		1												2
2019-05-10	blue	12	outside	4			40		6								1											2
2019-05-13	white	5	inside				66	2	4							1						1	1
2019-05-13	yellow	5	inside	1			15	6	3			1		1															1
2019-05-13	blue	5	inside	2			9	2				1
2019-05-13	white	6	inside	1			20	2	2
2019-05-13	yellow	6	inside				5	2			1					1												3
2019-05-13	blue	6	inside				79		2							2
2019-05-13	white	7	inside	1			14	2	2		1																	1	1
2019-05-13	yellow	7	inside				20	5	9		1					1												1
2019-05-13	blue	7	inside	1			10	1	10
2019-05-13	white	8	inside	5			91		4	2	1			3		2													2
2019-05-13	yellow	8	inside	1			12	7	1					3		1												1
2019-05-13	blue	8	inside	3			14	1	5
2019-05-13	white	9	outside	6			33		6					1		3	1											1
2019-05-13	yellow	9	outside	3			17		4							1												2
2019-05-13	blue	9	outside	6			8		6							1														1
2019-05-13	white	10	outside	11			15		7					1		3							1
2019-05-13	yellow	10	outside	5			10		8					3		2													1
2019-05-13	blue	10	outside	7			4		8															1
2019-05-13	white	11	outside	7			6		2					2		2
2019-05-13	yellow	11	outside	3			4		9							1	1						1					1
2019-05-13	blue	11	outside	1			4		1							1																								1		trap visited by birds
2019-05-13	white	12	outside				18		1			1		1														1
2019-05-13	yellow	12	outside				11
2019-05-13	blue	12	outside				15		5														1					1
2019-05-17	white	5	inside	1			26	2	2					2		3
2019-05-17	yellow	5	inside				6		2					3		1
2019-05-17	blue	5	inside	2			3		3
2019-05-17	white	6	inside	1			27		3							2
2019-05-17	yellow	6	inside	1			4		1					4	1													1
2019-05-17	blue	6	inside	1			46	1	2		1					2												3
2019-05-17	white	7	inside	2			5	1	1	2	1			4		1												2
2019-05-17	yellow	7	inside				9	1	3		1			4
2019-05-17	blue	7	inside				14		1							1												2
2019-05-17	white	8	inside	4			69		4	2				4		46						1	1
2019-05-17	yellow	8	inside				9	4	2		1			3		4							1	1				1
2019-05-17	blue	8	inside	2			8		2		2			1		3
2019-05-17	white	9	outside	5			12		5							3							1
2019-05-17	yellow	9	outside	3			5		8							1							1		1
2019-05-17	blue	9	outside	2			9		5					2		4						1						3
2019-05-17	white	10	outside	6			24		3	1	1			2		90	1											2
2019-05-17	yellow	10	outside	3			18		10		2	1		10		10						1						1
2019-05-17	blue	10	outside	2			7		11		1					2											1
2019-05-17	white	11	outside	1			4		7							1												1	1
2019-05-17	yellow	11	outside	1			6		2					1														1
2019-05-17	blue	11	outside	1			1		2																		1									1						trap visited by birds
2019-05-17	white	12	outside				14		2							2	1											2
2019-05-17	yellow	12	outside				11							7			1						1	1				2
2019-05-17	blue	12	outside				5		4							1	1					1	1					3
2019-05-22	white	5	inside	1			14		4					1		4	1					1						1
2019-05-22	yellow	5	inside	1			10	1	1					2		1							1					2
2019-05-22	blue	5	inside	1			4	1	1							1
2019-05-22	white	6	inside	1			4		2			1				1	1					1						2
2019-05-22	yellow	6	inside	1			3	1						1								2						1
2019-05-22	blue	6	inside				14		1		1						1						1					2	1
2019-05-22	white	7	inside				4	1	2	1				1					1			1						5	1
2019-05-22	yellow	7	inside				7	1	1					1	1												1	9	1
2019-05-22	blue	7	inside				9		3					1		1						1						1
2019-05-22	white	8	inside	3			42	1	3		2					38			1				2				1	1
2019-05-22	yellow	8	inside				6		2			1		1		4							1				1	3
2019-05-22	blue	8	inside	1			10		3		1					2							1					5
2019-05-22	white	9	outside				69		6			1		1		30	1	1	1				1
2019-05-22	yellow	9	outside	2			22		4		5	1		1		10	1		1			2	1					5
2019-05-22	blue	9	outside	2			35	1	3		1					8	1	1				2						3	1
2019-05-22	white	10	outside	6			24		2		3			1		86	1					1	2					5
2019-05-22	yellow	10	outside	1			23		7		3			22	1	33	1	2					2				1	9
2019-05-22	blue	10	outside	1			7		5		3	2		1		3	1					1	3					7
2019-05-22	white	11	outside	7			11		2		4			2		1	3					2						6
2019-05-22	yellow	11	outside				8		6		2			3		7	5	3	1			2	2				2	5														trap visited by birds
2019-05-22	blue	11	outside	1			7		4								3	1				2					2	1												1	1	trap visited by birds
2019-05-22	white	12	outside	3			42		3		1			1		17	3											4
2019-05-22	yellow	12	outside				19		5		3			2		15	6	2				2	1
2019-05-22	blue	12	outside	1			21		4		1			2		8	6					1	1					2

## Sheet: Pan traps bees
Type	CollectionDate	Year	Trapping station	Colour	Species	Sex	Thorax width (mm)
In	2016-05-13	2016	5	yellow	Chelostoma florisomne	f	2.79
In	2016-05-13	2016	6	yellow	Chelostoma florisomne	f	2.13
In	2016-05-13	2016	6	yellow	Chelostoma florisomne	m	2.39
In	2016-05-13	2016	8	yellow	Chelostoma florisomne	f	2.23
In	2016-05-17	2016	6	yellow	Lasioglossum pauxillum	f	1.84
In	2016-05-17	2016	7	white	Lasioglossum laticeps	f	2.24
In	2016-05-17	2016	7	yellow	Lasioglossum glabriusculum	f	1.34
In	2016-05-30	2016	6	white	Chelostoma florisomne	m	2.3
In	2016-05-17	2016	8	yellow	Halictus simplex-Gruppe	f	3.01
In	2016-05-20	2016	6	yellow	Chelostoma florisomne	m	2.38
In	2016-05-20	2016	6	yellow	Chelostoma florisomne	f	2.47
In	2016-05-23	2016	7	white	Lasioglossum pauxillum	f	1.71
In	2016-05-23	2016	8	yellow	Chelostoma florisomne	m	2.24
In	2016-05-23	2016	8	yellow	Halictus tumulorum	f	2.29
In	2016-06-07	2016	7	white	Andrena humilis	f	3.2
In	2016-06-10	2016	7	blue	Apis mellifera	w	4.05
In	2017-04-07	2017	5	yellow	Andrena bicolor	f	2.82
In	2017-04-07	2017	5	yellow	Lasioglossum malachurum	f	2.42
In	2017-04-07	2017	5	yellow	Andrena minutula	f	2.03
In	2017-04-07	2017	7	white	Lasioglossum malachurum	f	2.43
In	2017-04-07	2017	7	yellow	Andrena cineraria	f	3.69
In	2017-04-07	2017	7	blue	Lasioglossum malachurum	f	2.21
In	2017-04-07	2017	8	yellow	Andrena subopaca	f	2.04
In	2017-04-07	2017	8	yellow	Lasioglossum malachurum	f	2.53
In	2017-04-07	2017	8	blue	Lasioglossum malachurum	f	2.49
In	2017-04-10	2017	5	blue	Andrena dorsata	f	2.92
In	2017-04-10	2017	6	blue	Lasioglossum malachurum	f	2.39
In	2017-04-10	2017	7	yellow	Lasioglossum malachurum	f	2.47
In	2017-04-10	2017	7	yellow	Lasioglossum malachurum	f	2.21
In	2017-04-10	2017	8	yellow	Andrena vaga	f	3.52
In	2017-04-13	2017	5	white	Lasioglossum malachurum	f	2.41
In	2017-04-13	2017	5	yellow	Lasioglossum malachurum	f	2.56
In	2017-04-13	2017	7	yellow	Lasioglossum malachurum	f	2.52
In	2017-04-13	2017	5	white	Lasioglossum laticeps	f	2.1
In	2017-04-13	2017	5	white	Lasioglossum calceatum	f	2.51
In	2017-04-18	2017	5	yellow	Andrena haemorrhoa	f	3.49
In	2017-04-18	2017	6	yellow	Lasioglossum malachurum	f	3.51
In	2017-04-18	2017	8	yellow	Lasioglossum malachurum	f	2.46
In	2017-04-24	2017	5	yellow	Lasioglossum malachurum	f	2.56
In	2017-04-24	2017	5	yellow	Lasioglossum pauxillum	f	1.81
In	2017-04-24	2017	5	yellow	Andrena minutula	f	2.03
In	2017-04-24	2017	5	yellow	Lasioglossum malachurum	f	2.45
In	2017-04-24	2017	5	blue	Lasioglossum malachurum	f	2.47
In	2017-04-24	2017	6	blue	Lasioglossum malachurum	f	2.3
In	2017-04-24	2017	7	white	Halictus simplex-Gruppe	f	3.15
In	2017-04-24	2017	7	yellow	Lasioglossum pauxillum	f	1.74
In	2017-04-24	2017	8	white	Lasioglossum pauxillum	f	1.94
In	2017-04-24	2017	8	yellow	Andrena subopaca	f	1.97
In	2017-04-24	2017	8	yellow	Lasioglossum malachurum	f	2.38
In	2017-04-28	2017	5	yellow	Lasioglossum calceatum	f	2.59
In	2017-04-28	2017	6	white	Lasioglossum glabriusculum	f	1.4
In	2017-05-01	2017	5	white	Andrena haemorrhoa	m	2.53
In	2017-05-01	2017	5	white	Andrena minutula	f	2.21
In	2017-05-01	2017	5	yellow	Halictus tumulorum	f	2.14
In	2017-05-01	2017	6	yellow	Lasioglossum glabriusculum	f	1.4
In	2017-05-01	2017	6	yellow	Lasioglossum pauxillum	f	1.84
In	2017-05-01	2017	6	yellow	Lasioglossum malachurum	f	2.51
In	2017-05-01	2017	7	blue	Lasioglossum pauxillum	f	1.79
In	2017-05-01	2017	8	yellow	Lasioglossum malachurum	f	2.41
In	2017-05-01	2017	8	yellow	Lasioglossum pauxillum	f	1.77
In	2017-05-05	2017	5	blue	Lasioglossum pauxillum	f	1.88
In	2017-05-05	2017	6	yellow	Lasioglossum calceatum	f	2.85
In	2017-05-05	2017	6	yellow	Lasioglossum pauxillum	f	1.96
In	2017-05-05	2017	7	yellow	Andrena subopaca	f	2.1
In	2017-05-05	2017	8	white	Lasioglossum pauxillum	f	1.84
In	2017-05-08	2017	5	white	Andrena minutula	f	2.1
In	2017-05-08	2017	5	yellow	Lasioglossum malachurum	f	2.04
In	2017-05-08	2017	6	yellow	Lasioglossum pauxillum	f	1.64
In	2017-05-08	2017	7	yellow	Lasioglossum glabriusculum	f	1.51
In	2017-05-08	2017	7	yellow	Lasioglossum pallens	f	2.53
In	2017-05-08	2017	8	yellow	Lasioglossum malachurum	f	2.55
In	2017-05-08	2017	8	blue	Lasioglossum laticeps	f	2.15
In	2017-05-08	2017	8	blue	Halictus simplex-Gruppe	f	2.51
In	2017-05-12	2017	5	white	Lasioglossum pauxillum	f	1.82
In	2017-05-12	2017	5	white	Lasioglossum pauxillum	f	1.86
In	2017-05-12	2017	6	white	Lasioglossum glabriusculum	f	1.7
In	2017-05-12	2017	8	white	Halictus tumulorum	f	2.19
In	2017-05-12	2017	8	white	Andrena subopaca	f	1.83
In	2017-05-12	2017	8	yellow	Lasioglossum pauxillum	f	1.85
In	2017-05-12	2017	8	yellow	Lasioglossum pauxillum	f	1.75
In	2017-05-15	2017	5	white	Lasioglossum calceatum	f	2.44
In	2017-05-15	2017	5	yellow	Lasioglossum calceatum	f	2.39
In	2017-05-15	2017	5	yellow	Halictus tumulorum	f	1.97
In	2017-05-15	2017	6	yellow	Lasioglossum pauxillum	f	1.69
In	2017-05-15	2017	7	yellow	Halictus tumulorum	f	2.23
In	2017-05-15	2017	7	yellow	Lasioglossum glabriusculum	f	1.42
In	2017-05-15	2017	8	white	Halictus tumulorum	f	1.98
In	2017-05-15	2017	8	yellow	Chelostoma florisomne	m	2.07
In	2018-04-20	2018	8	blue	Lasioglossum malachurum	f	2.6
In	2018-04-27	2018	5	yellow	Chelostoma florisomne	m	2.59
In	2018-04-27	2018	5	yellow	Chelostoma florisomne	m	2.53
In	2018-04-27	2018	7	yellow	Chelostoma florisomne	m	2.46
In	2018-04-27	2018	8	yellow	Lasioglossum pauxillum	f	1.69
In	2018-04-27	2018	8	yellow	Chelostoma florisomne	m	2.38
In	2018-04-27	2018	8	yellow	Chelostoma florisomne	m	2.58
In	2018-04-30	2018	5	white	Chelostoma florisomne	m	2.6
In	2018-04-30	2018	5	yellow	Halictus tumulorum	f	2.1
In	2018-04-30	2018	5	yellow	Chelostoma florisomne	m	2.64
In	2018-04-30	2018	6	white	Lasioglossum pauxillum	f	1.72
In	2018-04-30	2018	7	yellow	Osmia brevicornis	m	3.11
In	2018-04-30	2018	8	yellow	Chelostoma florisomne	m	2.42
In	2018-05-04	2018	5	white	Lasioglossum calceatum	f	2.64
In	2018-05-07	2018	5	white	Andrena fulvago	m	2.44
In	2018-05-07	2018	5	yellow	Andrena subopaca	f	2.13
In	2018-05-07	2018	5	yellow	Chelostoma florisomne	m	2.48
In	2018-05-07	2018	8	yellow	Chelostoma florisomne	m	2.38
In	2018-05-07	2018	8	yellow	Chelostoma florisomne	m	2.53
In	2018-05-07	2018	8	yellow	Lasioglossum calceatum	f	2.59
In	2018-04-09	2018	5	white	Lasioglossum malachurum	f	2.62
In	2018-04-09	2018	5	yellow	Lasioglossum malachurum	f	2.41
In	2018-04-09	2018	5	yellow	Colletes cunicularius	m	4.15
In	2018-04-09	2018	5	blue	Lasioglossum calceatum	f	2.89
In	2018-04-09	2018	6	white	Lasioglossum malachurum	f	2.69
In	2018-04-09	2018	6	blue	Lasioglossum malachurum	f	2.54
In	2018-04-09	2018	7	yellow	Lasioglossum laticeps	f	2.3
In	2018-04-09	2018	7	yellow	Lasioglossum malachurum	f	2.71
In	2018-04-09	2018	7	yellow	Lasioglossum malachurum	f	2.38
In	2018-04-09	2018	7	yellow	Lasioglossum malachurum	f	2.75
In	2018-04-09	2018	8	yellow	Lasioglossum malachurum	f	2.48
In	2018-04-09	2018	8	blue	Lasioglossum malachurum	f	2.62
In	2018-04-09	2018	8	blue	Lasioglossum malachurum	f	2.22
In	2018-04-09	2018	8	blue	Colletes cunicularius	m	4.36
In	2018-04-09	2018	8	blue	Andrena bicolor	f	2.64
In	2018-04-09	2018	8	blue	Lasioglossum malachurum	f	2.75
In	2018-04-13	2018	6	yellow	Lasioglossum malachurum	f	2.46
In	2018-04-13	2018	6	yellow	Lasioglossum malachurum	f	2.58
In	2018-04-13	2018	6	yellow	Andrena minutula	f	2.01
In	2018-04-13	2018	6	yellow	Lasioglossum malachurum	f	2.52
In	2018-04-13	2018	6	yellow	Lasioglossum malachurum	f	2.61
In	2018-04-13	2018	6	yellow	Andrena bicolor	f	2.78
In	2018-04-13	2018	6	yellow	Lasioglossum malachurum	f	2.59
In	2018-04-13	2018	5	blue	Lasioglossum malachurum	f	2.63
In	2018-04-13	2018	6	white	Lasioglossum malachurum	f	2.62
In	2018-04-13	2018	6	white	Lasioglossum malachurum	f	2.58
In	2018-04-13	2018	6	white	Lasioglossum calceatum	f	2.59
In	2018-04-13	2018	6	white	Lasioglossum malachurum	f	2.47
In	2018-04-13	2018	6	white	Lasioglossum malachurum	f	2.66
In	2018-04-13	2018	6	yellow	Lasioglossum malachurum	f	2.5
In	2018-04-13	2018	6	yellow	Lasioglossum malachurum	f	2.35
In	2018-04-13	2018	6	yellow	Lasioglossum malachurum	f	2.61
In	2018-04-13	2018	6	blue	Lasioglossum malachurum	f	2.48
In	2018-04-13	2018	7	yellow	Lasioglossum malachurum	f	2.45
In	2018-04-13	2018	7	yellow	Lasioglossum malachurum	f	2.57
In	2018-04-13	2018	7	yellow	Lasioglossum malachurum	f	2.44
In	2018-04-13	2018	7	yellow	Lasioglossum malachurum	f	2.66
In	2018-04-13	2018	7	yellow	Lasioglossum malachurum	f	2.55
In	2018-04-13	2018	7	blue	Lasioglossum malachurum	f	2.7
In	2018-04-13	2018	7	blue	Lasioglossum malachurum	f	2.5
In	2018-04-13	2018	8	white	Lasioglossum malachurum	f	2.85
In	2018-04-13	2018	8	white	Lasioglossum malachurum	f	2.27
In	2018-04-13	2018	8	yellow	Lasioglossum malachurum	f	2.35
In	2018-04-13	2018	8	yellow	Andrena haemorrhoa	m	2.78
In	2018-04-13	2018	8	yellow	Lasioglossum malachurum	f	2.48
In	2018-04-13	2018	8	yellow	Lasioglossum malachurum	f	2.52
In	2018-04-13	2018	8	yellow	Lasioglossum malachurum	f	2.58
In	2018-04-13	2018	8	yellow	Lasioglossum malachurum	f	2.7
In	2018-04-13	2018	8	yellow	Lasioglossum malachurum	f	2.53
In	2018-04-13	2018	8	yellow	Andrena subopaca	f	1.89
In	2018-04-13	2018	8	blue	Lasioglossum laticeps	f	2.04
In	2018-04-13	2018	8	blue	Lasioglossum malachurum	f	2.52
In	2018-04-13	2018	8	blue	Lasioglossum pallens	m	2.08
In	2018-04-13	2018	8	blue	Lasioglossum malachurum	f	2.55
In	2018-04-16	2018	5	yellow	Andrena haemorrhoa	m	2.85
In	2018-04-16	2018	6	yellow	Lasioglossum malachurum	f	2.65
In	2018-04-16	2018	6	yellow	Lasioglossum calceatum	f	2.7
In	2018-04-16	2018	7	white	Lasioglossum malachurum	f	2.63
In	2018-04-16	2018	8	white	Lasioglossum malachurum	f	2.49
In	2018-04-16	2018	8	yellow	Lasioglossum malachurum	f	2.54
In	2018-04-16	2018	8	yellow	Lasioglossum malachurum	f	2.67
In	2018-04-16	2018	8	yellow	Lasioglossum malachurum	f	2.56
In	2018-04-16	2018	8	yellow	Lasioglossum pauxillum	f	1.67
In	2018-04-16	2018	8	blue	Lasioglossum malachurum	f	2.58
In	2018-04-20	2018	5	white	Lasioglossum malachurum	f	2.58
In	2018-04-20	2018	6	white	Lasioglossum calceatum	f	2.75
In	2018-04-20	2018	6	yellow	Andrena cineraria	f	3.43
In	2018-04-20	2018	6	yellow	Lasioglossum malachurum	f	2.46
In	2018-04-20	2018	8	white	Lasioglossum malachurum	f	2.72
In	2018-04-20	2018	8	white	Lasioglossum calceatum	f	3.02
In	2018-04-20	2018	8	white	Lasioglossum calceatum	f	2.45
In	2019-04-08	2019	5	white	Andrena vaga	m	3.3
In	2019-04-08	2019	5	white	Colletes cunicularius	m	3.76
In	2019-04-08	2019	5	white	Colletes cunicularius	f	4.69
In	2019-04-08	2019	5	white	Andrena vaga	f	4.1
In	2019-04-08	2019	5	white	Andrena vaga	f	3.89
In	2019-04-08	2019	5	white	Andrena vaga	f	4.17
In	2019-04-08	2019	5	white	Colletes cunicularius	m	4.73
In	2019-04-08	2019	5	white	Andrena vaga	f	3.97
In	2019-04-08	2019	5	yellow	Andrena vaga	f	4.32
In	2019-04-08	2019	5	yellow	Andrena vaga	f	3.82
In	2019-04-08	2019	5	yellow	Lasioglossum malachurum	f	2.61
In	2019-04-08	2019	5	yellow	Andrena vaga	m	3.08
In	2019-04-08	2019	5	blue	Andrena vaga	m	3.25
In	2019-04-08	2019	6	white	Lasioglossum malachurum	f	2.47
In	2019-04-08	2019	6	white	Andrena vaga	m	3
In	2019-04-08	2019	6	white	Lasioglossum malachurum	f	2.33
In	2019-04-08	2019	6	yellow	Lasioglossum malachurum	f	2.42
In	2019-04-08	2019	6	yellow	Lasioglossum malachurum	f	2.56
In	2019-04-08	2019	6	yellow	Lasioglossum malachurum	f	2.66
In	2019-04-08	2019	6	yellow	Andrena vaga	m	3.05
In	2019-04-08	2019	6	yellow	Andrena vaga	m	3.16
In	2019-04-08	2019	6	yellow	Lasioglossum malachurum	f	2.64
In	2019-04-08	2019	6	yellow	Colletes cunicularius	m	4.2
In	2019-04-08	2019	6	yellow	Lasioglossum malachurum	f	2.46
In	2019-04-08	2019	6	yellow	Andrena vaga	m	3.29
In	2019-04-08	2019	6	yellow	Andrena vaga	f	4.04
In	2019-04-08	2019	6	yellow	Andrena vaga	m	3.28
In	2019-04-08	2019	6	blue	Colletes cunicularius	m	4.3
In	2019-04-08	2019	6	blue	Andrena vaga	f	4.11
In	2019-04-08	2019	6	blue	Andrena vaga	f	4.2
In	2019-04-08	2019	7	white	Colletes cunicularius	m	4.26
In	2019-04-08	2019	7	white	Andrena vaga	f	4.2
In	2019-04-08	2019	7	white	Andrena vaga	m	3.16
In	2019-04-08	2019	7	yellow	Lasioglossum malachurum	f	2.64
In	2019-04-08	2019	7	yellow	Lasioglossum malachurum	f	2.48
In	2019-04-08	2019	7	yellow	Lasioglossum malachurum	f	2.54
In	2019-04-08	2019	7	yellow	Lasioglossum malachurum	f	2.49
In	2019-04-08	2019	7	yellow	Andrena flavipes	m	2.63
In	2019-04-08	2019	7	yellow	Andrena vaga	m	3.08
In	2019-04-08	2019	7	yellow	Andrena vaga	f	4.56
In	2019-04-08	2019	7	yellow	Andrena vaga	m	3.24
In	2019-04-08	2019	8	white	Colletes cunicularius	f	4.54
In	2019-04-08	2019	8	white	Andrena vaga	m	3.27
In	2019-04-08	2019	8	white	Colletes cunicularius	m	4.29
In	2019-04-08	2019	8	white	Lasioglossum malachurum	f	2.44
In	2019-04-08	2019	8	white	Andrena vaga	m	3.14
In	2019-04-08	2019	8	white	Colletes cunicularius	f	4.61
In	2019-04-08	2019	8	white	Andrena vaga	m	3.13
In	2019-04-08	2019	8	white	Andrena vaga	m	3.02
In	2019-04-08	2019	8	white	Andrena flavipes	m	2.56
In	2019-04-08	2019	8	white	Andrena vaga	f	3.75
In	2019-04-08	2019	8	white	Andrena vaga	f	4.14
In	2019-04-08	2019	8	white	Andrena fulva	f	4.24
In	2019-04-08	2019	8	white	Lasioglossum malachurum	f	2.55
In	2019-04-08	2019	8	white	Andrena vaga	f	4.23
In	2019-04-08	2019	8	white	Andrena vaga	m	2.98
In	2019-04-08	2019	8	white	Lasioglossum malachurum	f	2.32
In	2019-04-08	2019	8	white	Andrena vaga	m	3.43
In	2019-04-08	2019	8	white	Andrena vaga	f	4.19
In	2019-04-08	2019	8	white	Andrena minutula	f	2.12
In	2019-04-08	2019	8	white	Colletes cunicularius	m	3.89
In	2019-04-08	2019	8	white	Andrena vaga	m	3
In	2019-04-08	2019	8	white	Andrena vaga	m	3.38
In	2019-04-08	2019	8	white	Andrena vaga	f	4.76
In	2019-04-08	2019	8	white	Andrena vaga	f	4.57
In	2019-04-08	2019	8	yellow	Andrena vaga	m	2.72
In	2019-04-08	2019	8	yellow	Andrena vaga	m	2.81
In	2019-04-08	2019	8	yellow	Andrena vaga	f	4.13
In	2019-04-08	2019	8	yellow	Andrena vaga	f	4.12
In	2019-04-08	2019	8	yellow	Colletes cunicularius	m	3.83
In	2019-04-08	2019	8	yellow	Lasioglossum malachurum	f	2.65
In	2019-04-08	2019	8	yellow	Colletes cunicularius	m	4.22
In	2019-04-08	2019	8	blue	Andrena vaga	f	4.68
In	2019-04-08	2019	8	blue	Andrena vaga	m	3.14
In	2019-04-08	2019	8	blue	Andrena vaga	m	3.37
In	2019-04-08	2019	8	blue	Colletes cunicularius	m	3.94
In	2019-04-08	2019	8	blue	Colletes cunicularius	m	4.37
In	2019-04-08	2019	8	blue	Andrena vaga	f	4.19
In	2019-04-08	2019	8	blue	Andrena vaga	m	2.89
In	2019-04-08	2019	8	blue	Colletes cunicularius	m	4.11
In	2019-04-08	2019	8	blue	Colletes cunicularius	m	3.66
In	2019-04-08	2019	8	blue	Andrena vaga	f	4.7
In	2019-04-08	2019	8	blue	Andrena vaga	m	2.97
In	2019-04-08	2019	8	blue	Colletes cunicularius	m	4.21
In	2019-04-12	2019	5	yellow	Andrena vaga	f	4.28
In	2019-04-12	2019	5	yellow	Andrena vaga	f	4.48
In	2019-04-12	2019	6	yellow	Andrena vaga	f	4.02
In	2019-04-12	2019	6	blue	Andrena vaga	f	3.99
In	2019-04-12	2019	8	yellow	Andrena vaga	f	4.38
In	2019-04-12	2019	8	blue	Andrena dorsata	f	3.02
In	2019-04-15	2019	7	white	Andrena haemorrhoa	m	2.87
In	2019-04-18	2019	5	white	Lasioglossum malachurum	f	2.36
In	2019-04-18	2019	5	white	Lasioglossum malachurum	f	2.45
In	2019-04-18	2019	5	white	Lasioglossum malachurum	f	2.65
In	2019-04-18	2019	5	white	Lasioglossum malachurum	f	2.64
In	2019-04-18	2019	5	yellow	Andrena flavipes	m	2.71
In	2019-04-18	2019	5	yellow	Lasioglossum malachurum	f	2.69
In	2019-04-18	2019	5	yellow	Lasioglossum malachurum	f	2.58
In	2019-04-18	2019	5	blue	Lasioglossum malachurum	f	2.45
In	2019-04-18	2019	5	blue	Lasioglossum malachurum	f	2.25
In	2019-04-18	2019	6	yellow	Lasioglossum malachurum	f	2.63
In	2019-04-18	2019	6	yellow	Lasioglossum malachurum	f	2.45
In	2019-04-18	2019	6	yellow	Lasioglossum malachurum	f	2.52
In	2019-04-18	2019	6	yellow	Lasioglossum malachurum	f	2.39
In	2019-04-18	2019	6	yellow	Lasioglossum malachurum	f	2.49
In	2019-04-18	2019	6	yellow	Lasioglossum malachurum	f	2.51
In	2019-04-18	2019	6	yellow	Lasioglossum malachurum	f	2.61
In	2019-04-18	2019	6	yellow	Lasioglossum malachurum	f	2.41
In	2019-04-18	2019	6	yellow	Lasioglossum malachurum	f	2.58
In	2019-04-18	2019	6	yellow	Lasioglossum malachurum	f	2.45
In	2019-04-18	2019	6	yellow	Lasioglossum malachurum	f	2.46
In	2019-04-18	2019	6	yellow	Lasioglossum malachurum	f	2.51
In	2019-04-18	2019	6	yellow	Lasioglossum malachurum	f	2.52
In	2019-04-18	2019	6	yellow	Lasioglossum malachurum	f	2.25
In	2019-04-18	2019	6	yellow	Lasioglossum malachurum	f	2.44
In	2019-04-18	2019	6	yellow	Lasioglossum malachurum	f	2.48
In	2019-04-18	2019	6	yellow	Lasioglossum malachurum	f	2.34
In	2019-04-18	2019	6	yellow	Lasioglossum malachurum	f	2.45
In	2019-04-18	2019	6	yellow	Lasioglossum malachurum	f	2.32
In	2019-04-18	2019	6	yellow	Lasioglossum malachurum	f	2.62
In	2019-04-18	2019	6	yellow	Lasioglossum malachurum	f	2.39
In	2019-04-18	2019	6	yellow	Lasioglossum malachurum	f	2.52
In	2019-04-18	2019	6	yellow	Lasioglossum malachurum	f	2.38
In	2019-04-18	2019	6	yellow	Lasioglossum malachurum	f	2.58
In	2019-04-18	2019	6	yellow	Lasioglossum malachurum	f	2.39
In	2019-04-18	2019	6	yellow	Lasioglossum malachurum	f	2.35
In	2019-04-18	2019	6	yellow	Lasioglossum malachurum	f	2.53
In	2019-04-18	2019	6	yellow	Lasioglossum malachurum	f	2.44
In	2019-04-18	2019	6	yellow	Osmia caerulescens	m	2.81
In	2019-04-18	2019	6	yellow	Lasioglossum malachurum	f	2.51
In	2019-04-18	2019	6	yellow	Lasioglossum malachurum	f	2.36
In	2019-04-18	2019	6	yellow	Lasioglossum malachurum	f	2.47
In	2019-04-18	2019	6	yellow	Lasioglossum malachurum	f	2.25
In	2019-04-18	2019	6	yellow	Lasioglossum malachurum	f	2.5
In	2019-04-18	2019	6	blue	Lasioglossum malachurum	f	2.48
In	2019-04-18	2019	7	white	Lasioglossum malachurum	f	2.58
In	2019-04-18	2019	7	white	Lasioglossum malachurum	f	2.61
In	2019-04-18	2019	7	white	Lasioglossum malachurum	f	2.38
In	2019-04-18	2019	7	yellow	Lasioglossum malachurum	f	2.32
In	2019-04-18	2019	7	yellow	Lasioglossum malachurum	f	2.56
In	2019-04-18	2019	7	yellow	Lasioglossum malachurum	f	2.66
In	2019-04-18	2019	7	yellow	Lasioglossum malachurum	f	2.67
In	2019-04-18	2019	7	yellow	Lasioglossum malachurum	f	2.53
In	2019-04-18	2019	7	yellow	Lasioglossum malachurum	f	2.4
In	2019-04-18	2019	7	yellow	Lasioglossum malachurum	f	2.57
In	2019-04-18	2019	7	yellow	Lasioglossum malachurum	f	2.47
In	2019-04-18	2019	7	yellow	Lasioglossum malachurum	f	2.44
In	2019-04-18	2019	7	yellow	Lasioglossum malachurum	f	2.41
In	2019-04-18	2019	7	yellow	Lasioglossum malachurum	f	2.54
In	2019-04-18	2019	7	yellow	Lasioglossum malachurum	f	2.36
In	2019-04-18	2019	7	yellow	Lasioglossum malachurum	f	2.6
In	2019-04-18	2019	7	yellow	Lasioglossum malachurum	f	2.1
In	2019-04-18	2019	8	white	Lasioglossum malachurum	f	2.54
In	2019-04-18	2019	8	white	Lasioglossum malachurum	f	2.47
In	2019-04-18	2019	8	white	Lasioglossum malachurum	f	2.52
In	2019-04-18	2019	8	white	Lasioglossum malachurum	f	2.62
In	2019-04-18	2019	8	white	Lasioglossum malachurum	f	2.4
In	2019-04-18	2019	8	white	Lasioglossum malachurum	f	2.57
In	2019-04-18	2019	8	white	Lasioglossum malachurum	f	2.46
In	2019-04-18	2019	8	white	Lasioglossum malachurum	f	2.51
In	2019-04-18	2019	8	white	Lasioglossum malachurum	f	2.7
In	2019-04-18	2019	8	white	Lasioglossum malachurum	f	2.41
In	2019-04-18	2019	8	white	Lasioglossum malachurum	f	2.52
In	2019-04-18	2019	8	yellow	Lasioglossum malachurum	f	2.48
In	2019-04-18	2019	8	yellow	Andrena minutula	f	2.01
In	2019-04-18	2019	8	blue	Lasioglossum malachurum	f	2.36
In	2019-04-18	2019	8	blue	Lasioglossum malachurum	f	2.47
In	2019-04-18	2019	8	blue	Lasioglossum malachurum	f	2.47
In	2019-04-18	2019	8	blue	Lasioglossum malachurum	f	2.24
In	2019-04-23	2019	5	white	Lasioglossum malachurum	f	2.67
In	2019-04-23	2019	5	white	Lasioglossum malachurum	f	2.52
In	2019-04-23	2019	5	white	Lasioglossum malachurum	f	2.55
In	2019-04-23	2019	5	white	Lasioglossum malachurum	f	2.42
In	2019-04-23	2019	5	yellow	Andrena minutula	f	2.19
In	2019-04-23	2019	6	white	Lasioglossum malachurum	f	2.34
In	2019-04-23	2019	6	yellow	Lasioglossum malachurum	f	2.64
In	2019-04-23	2019	6	yellow	Lasioglossum malachurum	f	2.42
In	2019-04-23	2019	6	yellow	Lasioglossum malachurum	f	2.58
In	2019-04-23	2019	6	yellow	Lasioglossum malachurum	f	2.5
In	2019-04-23	2019	6	yellow	Lasioglossum malachurum	f	2.55
In	2019-04-23	2019	6	yellow	Lasioglossum malachurum	f	2.61
In	2019-04-23	2019	6	yellow	Lasioglossum malachurum	f	2.48
In	2019-04-23	2019	6	yellow	Lasioglossum malachurum	f	2.62
In	2019-04-23	2019	6	yellow	Lasioglossum malachurum	f	2.63
In	2019-04-23	2019	6	yellow	Lasioglossum malachurum	f	2.45
In	2019-04-23	2019	6	yellow	Lasioglossum malachurum	f	2.46
In	2019-04-23	2019	6	yellow	Lasioglossum malachurum	f	2.34
In	2019-04-23	2019	6	yellow	Lasioglossum malachurum	f	2.48
In	2019-04-23	2019	6	yellow	Lasioglossum malachurum	f	2.35
In	2019-04-23	2019	6	yellow	Lasioglossum malachurum	f	2.5
In	2019-04-23	2019	6	yellow	Lasioglossum malachurum	f	2.38
In	2019-04-23	2019	6	yellow	Lasioglossum malachurum	f	2.55
In	2019-04-23	2019	6	yellow	Lasioglossum malachurum	f	2.43
In	2019-04-23	2019	6	yellow	Lasioglossum malachurum	f	2.49
In	2019-04-23	2019	6	yellow	Lasioglossum malachurum	f	2.59
In	2019-04-23	2019	6	yellow	Lasioglossum malachurum	f	2.61
In	2019-04-23	2019	6	yellow	Lasioglossum malachurum	f	2.6
In	2019-04-23	2019	6	yellow	Lasioglossum malachurum	f	2.39
In	2019-04-23	2019	6	yellow	Lasioglossum malachurum	f	2.45
In	2019-04-23	2019	6	yellow	Lasioglossum malachurum	f	2.49
In	2019-04-23	2019	6	yellow	Lasioglossum malachurum	f	2.62
In	2019-04-23	2019	6	yellow	Lasioglossum malachurum	f	2.42
In	2019-04-23	2019	6	yellow	Lasioglossum malachurum	f	2.51
In	2019-04-23	2019	6	yellow	Lasioglossum malachurum	f	2.62
In	2019-04-23	2019	6	yellow	Lasioglossum malachurum	f	2.32
In	2019-04-23	2019	6	yellow	Lasioglossum malachurum	f	2.65
In	2019-04-23	2019	6	yellow	Lasioglossum malachurum	f	2.74
In	2019-04-23	2019	6	yellow	Lasioglossum malachurum	f	2.56
In	2019-04-23	2019	6	yellow	Lasioglossum malachurum	f	2.61
In	2019-04-23	2019	6	yellow	Lasioglossum malachurum	f	2.47
In	2019-04-23	2019	6	yellow	Lasioglossum malachurum	f	2.38
In	2019-04-23	2019	7	white	Lasioglossum malachurum	f	2.25
In	2019-04-23	2019	7	white	Lasioglossum malachurum	f	2.5
In	2019-04-23	2019	7	white	Lasioglossum calceatum	f	2.86
In	2019-04-23	2019	7	white	Lasioglossum malachurum	f	2.46
In	2019-04-23	2019	7	white	Lasioglossum calceatum	f	2.81
In	2019-04-23	2019	7	white	Lasioglossum malachurum	f	2.57
In	2019-04-23	2019	7	yellow	Andrena bicolor	f	2.75
In	2019-04-23	2019	7	yellow	Lasioglossum malachurum	f	2.22
In	2019-04-23	2019	7	yellow	Lasioglossum malachurum	f	2.67
In	2019-04-23	2019	7	yellow	Lasioglossum malachurum	f	2.63
In	2019-04-23	2019	7	yellow	Lasioglossum malachurum	f	2.55
In	2019-04-23	2019	7	yellow	Lasioglossum malachurum	f	2.48
In	2019-04-23	2019	7	yellow	Lasioglossum malachurum	f	2.59
In	2019-04-23	2019	7	yellow	Lasioglossum malachurum	f	2.24
In	2019-04-23	2019	7	yellow	Lasioglossum malachurum	f	2.48
In	2019-04-23	2019	7	yellow	Lasioglossum malachurum	f	2.42
In	2019-04-23	2019	7	yellow	Lasioglossum malachurum	f	2.46
In	2019-04-23	2019	7	yellow	Lasioglossum malachurum	f	2.51
In	2019-04-23	2019	7	yellow	Lasioglossum malachurum	f	2.3
In	2019-04-23	2019	7	yellow	Lasioglossum malachurum	f	2.38
In	2019-04-23	2019	7	yellow	Lasioglossum malachurum	f	2.47
In	2019-04-23	2019	7	yellow	Lasioglossum malachurum	f	2.5
In	2019-04-23	2019	7	yellow	Lasioglossum malachurum	f	2.62
In	2019-04-23	2019	8	white	Lasioglossum malachurum	f	2.23
In	2019-04-23	2019	8	white	Lasioglossum malachurum	f	2.48
In	2019-04-23	2019	8	white	Lasioglossum malachurum	f	2.53
In	2019-04-23	2019	8	white	Lasioglossum malachurum	f	2.32
In	2019-04-23	2019	8	white	Lasioglossum malachurum	f	2.31
In	2019-04-23	2019	8	white	Lasioglossum malachurum	f	2.46
In	2019-04-23	2019	8	white	Lasioglossum malachurum	f	2.54
In	2019-04-23	2019	8	white	Lasioglossum malachurum	f	2.51
In	2019-04-23	2019	8	white	Lasioglossum malachurum	f	2.62
In	2019-04-23	2019	8	white	Lasioglossum malachurum	f	2.39
In	2019-04-23	2019	8	white	Lasioglossum malachurum	f	2.47
In	2019-04-23	2019	8	white	Lasioglossum malachurum	f	2.48
In	2019-04-23	2019	8	white	Lasioglossum malachurum	f	2.47
In	2019-04-23	2019	8	white	Lasioglossum malachurum	f	2.65
In	2019-04-23	2019	8	white	Lasioglossum malachurum	f	2.34
In	2019-04-23	2019	8	white	Lasioglossum malachurum	f	2.43
In	2019-04-23	2019	8	white	Lasioglossum malachurum	f	2.6
In	2019-04-23	2019	8	white	Lasioglossum malachurum	f	2.58
In	2019-04-23	2019	8	white	Lasioglossum malachurum	f	2.64
In	2019-04-23	2019	8	white	Lasioglossum malachurum	f	2.38
In	2019-04-23	2019	8	white	Lasioglossum malachurum	f	2.53
In	2019-04-23	2019	8	white	Lasioglossum malachurum	f	2.56
In	2019-04-23	2019	8	white	Lasioglossum malachurum	f	2.62
In	2019-04-23	2019	8	white	Lasioglossum malachurum	f	2.54
In	2019-04-23	2019	8	yellow	Lasioglossum malachurum	f	2.51
In	2019-04-23	2019	8	yellow	Lasioglossum malachurum	f	2.45
In	2019-04-23	2019	8	yellow	Lasioglossum malachurum	f	2.48
In	2019-04-23	2019	8	yellow	Lasioglossum malachurum	f	2.55
In	2019-04-23	2019	8	yellow	Halictus simplex-Gruppe	f	3.03
In	2019-04-23	2019	8	yellow	Lasioglossum malachurum	f	2.45
In	2019-04-23	2019	8	yellow	Lasioglossum malachurum	f	2.57
In	2019-04-23	2019	8	yellow	Lasioglossum calceatum	f	2.77
In	2019-04-23	2019	8	white	Lasioglossum malachurum	f	2.21
In	2019-04-23	2019	8	white	Lasioglossum malachurum	f	2.54
In	2019-04-23	2019	8	white	Lasioglossum malachurum	f	2.31
In	2019-04-23	2019	8	white	Lasioglossum malachurum	f	2.42
In	2019-04-26	2019	5	white	Chelostoma florisomne	m	2.43
In	2019-04-26	2019	5	yellow	Lasioglossum laticeps	f	2.2
In	2019-04-26	2019	5	yellow	Andrena flavipes	m	2.54
In	2019-04-26	2019	5	yellow	Lasioglossum pauxillum	f	1.81
In	2019-04-26	2019	6	white	Lasioglossum laticeps	f	2.24
In	2019-04-26	2019	6	white	Lasioglossum laticeps	f	2.05
In	2019-04-26	2019	7	white	Chelostoma florisomne	f	2.43
In	2019-04-26	2019	7	yellow	Lasioglossum malachurum	f	2.53
In	2019-04-26	2019	7	yellow	Lasioglossum malachurum	f	2.46
In	2019-04-26	2019	7	blue	Lasioglossum laticeps	f	2.06
In	2019-04-26	2019	8	white	Lasioglossum laticeps	f	2.28
In	2019-04-26	2019	8	yellow	Lasioglossum laticeps	f	2.21
In	2019-04-26	2019	8	yellow	Chelostoma florisomne	m	2.35
In	2019-04-26	2019	8	yellow	Andrena flavipes	m	2.82
In	2019-04-26	2019	8	yellow	Andrena ovatula	m	2.22
In	2019-04-29	2019	5	yellow	Lasioglossum malachurum	f	2.3
In	2019-04-29	2019	8	white	Osmia cornuta	m	4.37
In	2019-05-03	2019	5	white	Lasioglossum pauxillum	f	1.69
In	2019-05-03	2019	5	white	Sphecodes ephippius	f	1.78
In	2019-05-03	2019	5	yellow	Lasioglossum pauxillum	f	1.43
In	2019-05-03	2019	5	yellow	Lasioglossum malachurum	f	2.49
In	2019-05-03	2019	5	yellow	Chelostoma florisomne	m	2.46
In	2019-05-03	2019	5	yellow	Chelostoma florisomne	m	2.53
In	2019-05-03	2019	6	yellow	Andrena minutula	f	2.04
In	2019-05-03	2019	6	yellow	Lasioglossum laticeps	f	2.21
In	2019-05-03	2019	6	yellow	Lasioglossum malachurum	f	2.45
In	2019-05-03	2019	6	yellow	Lasioglossum malachurum	f	2.35
In	2019-05-03	2019	6	yellow	Lasioglossum malachurum	f	2.61
In	2019-05-03	2019	6	yellow	Lasioglossum malachurum	f	2.48
In	2019-05-03	2019	7	yellow	Lasioglossum malachurum	f	2.66
In	2019-05-03	2019	7	yellow	Lasioglossum pauxillum	f	1.77
In	2019-05-03	2019	8	white	Lasioglossum laticeps	f	2.11
In	2019-05-03	2019	8	white	Lasioglossum malachurum	f	2.63
In	2019-05-03	2019	8	white	Halictus simplex-Gruppe	f	3.24
In	2019-05-03	2019	8	yellow	Andrena minutula	f	2.12
In	2019-05-03	2019	8	yellow	Lasioglossum malachurum	f	2.53
In	2019-05-10	2019	5	yellow	Chelostoma florisomne	f	2.24
In	2019-05-10	2019	5	yellow	Lasioglossum malachurum	f	2.54
In	2019-05-10	2019	5	yellow	Lasioglossum laticeps	f	2.15
In	2019-05-10	2019	7	yellow	Andrena minutula	f	1.98
In	2019-05-10	2019	7	yellow	Lasioglossum pauxillum	f	1.65
In	2019-05-10	2019	7	yellow	Lasioglossum pauxillum	f	1.84
In	2019-05-10	2019	8	yellow	Lasioglossum pauxillum	f	1.74
In	2019-05-13	2019	5	yellow	Lasioglossum malachurum	f	2.42
In	2019-05-13	2019	8	white	Lasioglossum calceatum	f	2.58
In	2019-05-13	2019	8	white	Lasioglossum pauxillum	f	1.75
In	2019-05-13	2019	8	white	Lasioglossum pauxillum	f	1.79
In	2019-05-13	2019	8	yellow	Lasioglossum pauxillum	f	1.84
In	2019-05-13	2019	8	yellow	Lasioglossum pauxillum	f	1.72
In	2019-05-13	2019	8	yellow	Lasioglossum pauxillum	f	1.66
In	2019-05-17	2019	5	white	Lasioglossum calceatum	f	2.73
In	2019-05-17	2019	5	white	Lasioglossum villosulum	f	1.91
In	2019-05-17	2019	5	yellow	Halictus tumulorum	f	2.17
In	2019-05-17	2019	5	yellow	Halictus simplex-Gruppe	f	2.8
In	2019-05-17	2019	5	yellow	Lasioglossum pauxillum	f
In	2019-05-17	2019	6	yellow	Chelostoma florisomne	f	2.41
In	2019-05-17	2019	6	yellow	Lasioglossum pauxillum	f	1.8
In	2019-05-17	2019	6	yellow	Lasioglossum calceatum	f	2.78
In	2019-05-17	2019	6	yellow	Lasioglossum morio	f	1.61
In	2019-05-17	2019	7	white	Lasioglossum calceatum	f	2.77
In	2019-05-17	2019	7	white	Lasioglossum malachurum	f	2.25
In	2019-05-17	2019	7	white	Lasioglossum calceatum	f	2.77
In	2019-05-17	2019	7	white	Lasioglossum pauxillum	f	1.91
In	2019-05-17	2019	7	yellow	Andrena minutula	f	1.96
In	2019-05-17	2019	7	yellow	Andrena minutula	f	2
In	2019-05-17	2019	7	yellow	Lasioglossum malachurum	f	2.53
In	2019-05-17	2019	7	yellow	Lasioglossum malachurum	f	2.34
In	2019-05-17	2019	8	white	Lasioglossum calceatum	f	2.75
In	2019-05-17	2019	8	white	Lasioglossum pauxillum	f	1.89
In	2019-05-17	2019	8	white	Andrena minutula	f	2.05
In	2019-05-17	2019	8	white	Lasioglossum pauxillum	f	1.93
In	2019-05-17	2019	8	yellow	Lasioglossum politum	f	1.45
In	2019-05-17	2019	8	yellow	Lasioglossum malachurum	f	2.64
In	2019-05-17	2019	8	yellow	Halictus tumulorum	f	2.21
In	2019-05-17	2019	8	blue	Lasioglossum pauxillum	f	1.73
In	2019-05-22	2019	5	white	Halictus simplex-Gruppe	f	3.04
In	2019-05-22	2019	5	yellow	Andrena minutula	f	2.09
In	2019-05-22	2019	5	yellow	Andrena minutula	f	1.96
In	2019-05-22	2019	6	yellow	Lasioglossum pauxillum	f	1.85
In	2019-05-22	2019	7	white	Lasioglossum morio	f	1.68
In	2019-05-22	2019	7	yellow	Lasioglossum pauxillum	f	1.7
In	2019-05-22	2019	7	blue	Andrena ovatula	m	2.51
In	2019-05-22	2019	8	yellow	Lasioglossum pauxillum	f	1.74
Out	2017-04-07	2017	9	blau	Andrena vaga	m	3.15
Out	2017-04-07	2017	9	gelb	Andrena vaga	f	3.84
Out	2017-04-07	2017	9	gelb	Andrena vaga	f	3.83
Out	2017-04-07	2017	9	gelb	Apis mellifera	w	4.07
Out	2018-04-09	2018	9	blau	Andrena vaga	m	3.98
Out	2018-04-09	2018	9	blau	Lasioglossum malachurum	f	2.43
Out	2018-04-09	2018	9	gelb	Andrena chrysosceles	m	2.02
Out	2019-04-23	2019	9	weiss	Osmia cornuta	m	4.71
Out	2019-04-23	2019	9	weiss	Osmia cornuta	m	3.94
Out	2019-05-03	2019	11	gelb	Andrena bicolor	f	2.82
Out	2017-04-07	2017	9	gelb	Colletes cunicularius	f	4.62
Out	2018-04-09	2018	9	gelb	Andrena vaga	f	3.88
Out	2016-05-13	2016	10	gelb	Apis mellifera	w	4.47
Out	2017-04-07	2017	9	gelb	Lasioglossum fulvicorne	f	2.17
Out	2017-04-07	2017	9	gelb	Lasioglossum malachurum	f	2.57
Out	2017-04-07	2017	9	gelb	Lasioglossum malachurum	f	2.43
Out	2019-04-08	2019	11	weiss	Andrena cineraria	f	3.88
Out	2019-04-18	2019	9	blau	Andrena cineraria	f	4.04
Out	2017-04-07	2017	9	gelb	Lasioglossum malachurum	f	2.41
Out	2018-04-09	2018	9	gelb	Andrena vaga	m	3.36
Out	2018-04-09	2018	9	gelb	Andrena vaga	m	3.17
Out	2018-04-09	2018	9	gelb	Colletes cunicularius	m	4.09
Out	2018-04-09	2018	9	gelb	Lasioglossum calceatum	f	2.54
Out	2018-04-09	2018	9	gelb	Lasioglossum malachurum	f	2.55
Out	2018-04-09	2018	9	gelb	Osmia bicornis	m	3.32
Out	2019-04-23	2019	9	weiss	Osmia cornuta	m	3.75
Out	2018-04-09	2018	9	weiss	Colletes cunicularius	m	4.3
Out	2019-04-08	2019	9	blau	Andrena fulva	f	3.91
Out	2018-04-09	2018	10	blau	Andrena vaga	m	2.92
Out	2019-04-18	2019	9	gelb	Andrena fulvata	f	2.84
Out	2017-04-07	2017	9	weiss	Andrena vaga	f	4.2
Out	2019-05-22	2019	10	gelb	Andrena gravida	f	3.86
Out	2016-05-13	2016	11	gelb	Halictus simplex-Gruppe	f	2.96
Out	2016-05-13	2016	11	weiss	Lasioglossum calceatum	f	2.6
Out	2016-05-17	2016	9	blau	Apis mellifera	w	4.51
Out	2016-05-17	2016	9	gelb	Apis mellifera	w	3.88
Out	2017-04-07	2017	9	weiss	Andrena vaga	m	3.08
Out	2017-04-07	2017	9	weiss	Andrena vaga	m	2.84
Out	2017-04-07	2017	9	weiss	Colletes cunicularius	f	4.66
Out	2018-04-09	2018	10	blau	Colletes cunicularius	f	4.9
Out	2018-04-09	2018	10	gelb	Andrena vaga	f	4.17
Out	2019-04-18	2019	10	gelb	Andrena haemorrhoa	f	3.72
Out	2019-04-23	2019	9	weiss	Osmia cornuta	f	5.27
Out	2019-04-23	2019	9	weiss	Osmia cornuta	m	3.9
Out	2017-04-07	2017	9	weiss	Lasioglossum malachurum	f	2.43
Out	2017-04-07	2017	10	blau	Andrena vaga	f	4.1
Out	2017-04-07	2017	10	gelb	Andrena gravida	f	3.64
Out	2018-04-09	2018	10	gelb	Andrena vaga	m	3.1
Out	2018-04-09	2018	10	gelb	Andrena vaga	m	3.42
Out	2018-04-09	2018	10	gelb	Andrena vaga	m	3.17
Out	2018-04-09	2018	10	gelb	Andrena vaga	m	2.81
Out	2018-04-09	2018	10	gelb	Andrena vaga	m	3.25
Out	2018-04-09	2018	10	gelb	Colletes cunicularius	f	5.19
Out	2018-04-09	2018	10	gelb	Colletes cunicularius	m	4.03
Out	2019-04-18	2019	9	gelb	Andrena haemorrhoa	m	2.97
Out	2017-04-07	2017	10	gelb	Andrena vaga	f	3.44
Out	2016-05-17	2016	9	gelb	Apis mellifera	w	4.11
Out	2016-05-17	2016	10	gelb	Apis mellifera	w	4.27
Out	2016-05-17	2016	11	weiss	Andrena minutula	f	2.01
Out	2016-05-17	2016	11	weiss	Apis mellifera	w	4.22
Out	2016-05-17	2016	11	weiss	Colletes cunicularius	f	4.56
Out	2016-05-20	2016	9	blau	Apis mellifera	w	4.7
Out	2016-05-20	2016	9	gelb	Apis mellifera	w	4.25
Out	2016-05-20	2016	9	gelb	Apis mellifera	w	4.26
Out	2016-05-20	2016	9	gelb	Apis mellifera	w	4.56
Out	2016-05-20	2016	9	gelb	Apis mellifera	w	4.04
Out	2016-05-20	2016	10	blau	Osmia bicornis	f	3.94
Out	2016-05-20	2016	10	weiss	Apis mellifera	w	4.46
Out	2016-05-20	2016	10	weiss	Apis mellifera	w	4.03
Out	2016-05-20	2016	10	weiss	Halictus scabiosae	f	3.66
Out	2016-05-20	2016	10	weiss	Halictus simplex-Gruppe	f	3.07
Out	2019-05-22	2019	10	gelb	Andrena humilis	f	3.31
Out	2016-05-20	2016	10	weiss	Halictus simplex-Gruppe	f	3.18
Out	2016-05-20	2016	10	weiss	Megachile circumcincta	f	4.85
Out	2016-05-20	2016	11	blau	Apis mellifera	w	4.28
Out	2016-05-20	2016	11	gelb	Halictus simplex-Gruppe	f	3.08
Out	2017-04-07	2017	10	gelb	Andrena vaga	f	4.1
Out	2017-04-07	2017	10	gelb	Andrena vaga	f	3.85
Out	2017-04-07	2017	10	gelb	Andrena vaga	f	4.06
Out	2017-04-07	2017	10	weiss	Andrena cineraria	f	4.17
Out	2017-04-07	2017	10	weiss	Andrena vaga	f	3.94
Out	2017-04-07	2017	10	weiss	Andrena vaga	f	4.29
Out	2017-04-07	2017	10	weiss	Lasioglossum laticeps	f	2.01
Out	2017-04-07	2017	11	blau	Andrena vaga	f	4.11
Out	2017-04-07	2017	11	blau	Apis mellifera	w	4.02
Out	2017-04-07	2017	11	gelb	Andrena haemorrhoa	f	3.47
Out	2017-04-07	2017	11	gelb	Andrena vaga	f	3.88
Out	2018-04-09	2018	10	gelb	Colletes cunicularius	m	4.38
Out	2019-05-03	2019	10	gelb	Andrena minutula	f	1.91
Out	2019-05-10	2019	10	gelb	Andrena minutula	f	2.27
Out	2019-05-17	2019	10	gelb	Andrena minutula	f	1.98
Out	2019-05-22	2019	9	weiss	Andrena minutula	f	2.11
Out	2016-05-20	2016	11	gelb	Halictus simplex-Gruppe	f	3.32
Out	2017-04-07	2017	11	gelb	Andrena vaga	f	3.91
Out	2019-04-08	2019	9	blau	Andrena mitis	m	2.45
Out	2016-05-20	2016	12	blau	Halictus simplex-Gruppe	f	3.11
Out	2017-04-07	2017	11	gelb	Andrena vaga	f	3.54
Out	2018-04-09	2018	10	gelb	Colletes cunicularius	m	4.26
Out	2019-04-18	2019	10	blau	Andrena nitida	f	4.43
Out	2018-04-09	2018	10	gelb	Colletes cunicularius	m	4.51
Out	2018-04-09	2018	10	gelb	Colletes cunicularius	m	4.28
Out	2019-05-22	2019	10	weiss	Andrena ovatula	f	2.74
Out	2017-04-07	2017	11	gelb	Andrena vaga	m	3.14
Out	2017-04-07	2017	11	gelb	Andrena vaga	m	4
Out	2017-04-07	2017	11	gelb	Andrena vaga	m	3.07
Out	2017-04-07	2017	11	gelb	Andrena vaga	m	3.27
Out	2017-04-07	2017	11	gelb	Andrena vaga	m	3.06
Out	2017-04-07	2017	11	gelb	Andrena vaga	m	2.64
Out	2017-04-07	2017	11	gelb	Lasioglossum malachurum	f	2.48
Out	2017-04-07	2017	11	gelb	Lasioglossum malachurum	f	2.57
Out	2017-04-07	2017	11	gelb	Lasioglossum malachurum	f	2.28
Out	2017-04-07	2017	11	gelb	Lasioglossum malachurum	f	2.54
Out	2017-04-07	2017	11	gelb	Osmia cornuta	m	4.31
Out	2017-04-07	2017	11	weiss	Andrena vaga	m	3.3
Out	2017-04-07	2017	11	weiss	Andrena vaga	m	3.12
Out	2017-04-07	2017	12	blau	Apis mellifera	w	4.04
Out	2017-04-07	2017	12	blau	Apis mellifera	w	4.04
Out	2017-04-07	2017	12	blau	Apis mellifera	w	4.29
Out	2017-04-07	2017	12	blau	Apis mellifera	w	4.06
Out	2017-04-07	2017	12	blau	Lasioglossum malachurum	f	2.29
Out	2017-04-07	2017	12	gelb	Andrena vaga	f	3.89
Out	2017-04-07	2017	12	gelb	Lasioglossum malachurum	f	2.54
Out	2017-04-10	2017	9	gelb	Andrena bicolor	f	2.8
Out	2017-04-10	2017	9	gelb	Lasioglossum malachurum	f	2.43
Out	2017-04-10	2017	10	gelb	Andrena haemorrhoa	m	2.94
Out	2017-04-10	2017	10	gelb	Lasioglossum malachurum	f	2.24
Out	2017-04-10	2017	11	gelb	Andrena vaga	f	4.01
Out	2017-04-10	2017	11	gelb	Andrena vaga	f	4.14
Out	2017-04-10	2017	11	gelb	Andrena vaga	f	3.81
Out	2017-04-10	2017	11	gelb	Andrena vaga	f	3.96
Out	2017-04-10	2017	11	gelb	Andrena vaga	m	3.23
Out	2017-04-10	2017	11	gelb	Andrena vaga	m	2.69
Out	2017-04-10	2017	11	gelb	Chelostoma florisomne	m	2.54
Out	2017-04-10	2017	11	gelb	Lasioglossum malachurum	f	2.49
Out	2017-04-10	2017	11	gelb	Lasioglossum malachurum	f	2.22
Out	2017-04-10	2017	12	gelb	Andrena nitida	f	4.15
Out	2017-04-10	2017	12	weiss	Andrena cineraria	m	3.08
Out	2017-04-10	2017	12	weiss	Andrena vaga	f	3.68
Out	2017-04-10	2017	12	weiss	Halictus simplex-Gruppe	f	3.01
Out	2018-04-09	2018	10	gelb	Colletes cunicularius	m	4.18
Out	2018-04-09	2018	10	gelb	Lasioglossum calceatum	f	2.89
Out	2018-04-09	2018	10	gelb	Lasioglossum laticeps	f	1.87
Out	2018-04-09	2018	10	gelb	Lasioglossum malachurum	f	2.49
Out	2018-04-09	2018	10	weiss	Andrena cineraria	m	3.11
Out	2018-04-09	2018	10	weiss	Colletes cunicularius	m	5
Out	2018-04-09	2018	10	weiss	Colletes cunicularius	m	4.33
Out	2018-04-09	2018	10	weiss	Lasioglossum malachurum	f	2.59
Out	2018-04-09	2018	11	blau	Colletes cunicularius	m	4.22
Out	2018-04-09	2018	11	gelb	Andrena vaga	m	3.15
Out	2018-04-09	2018	11	gelb	Andrena vaga	m	3
Out	2018-04-09	2018	11	gelb	Colletes cunicularius	m	4.13
Out	2018-04-09	2018	11	gelb	Lasioglossum calceatum	f	2.58
Out	2018-04-09	2018	11	gelb	Lasioglossum malachurum	f	2.53
Out	2019-04-08	2019	9	weiss	Andrena vaga	f	4.36
Out	2019-04-08	2019	9	weiss	Andrena vaga	f	3.99
Out	2019-04-08	2019	9	weiss	Andrena vaga	f	4.44
Out	2019-04-08	2019	9	blau	Andrena vaga	f	4.08
Out	2019-04-08	2019	9	blau	Andrena vaga	f	4.39
Out	2019-04-08	2019	10	weiss	Andrena vaga	f	4.22
Out	2019-04-08	2019	10	weiss	Andrena vaga	f	4.53
Out	2019-04-08	2019	10	weiss	Andrena vaga	f	4.54
Out	2019-04-08	2019	10	weiss	Andrena vaga	f	4.15
Out	2019-04-08	2019	10	gelb	Andrena vaga	f	4.45
Out	2019-04-08	2019	10	gelb	Andrena vaga	f	3.93
Out	2019-04-08	2019	10	gelb	Andrena vaga	f	4.15
Out	2019-04-08	2019	10	gelb	Andrena vaga	f	4.14
Out	2019-04-08	2019	10	gelb	Andrena vaga	f	4.22
Out	2019-04-08	2019	10	gelb	Andrena vaga	f	4.39
Out	2019-04-12	2019	9	gelb	Andrena vaga	f	4
Out	2019-04-12	2019	10	weiss	Andrena vaga	f	4.22
Out	2019-04-12	2019	10	weiss	Andrena vaga	f	4.16
Out	2019-04-12	2019	10	weiss	Andrena vaga	f	4.43
Out	2019-04-12	2019	10	weiss	Andrena vaga	f	4.02
Out	2019-04-12	2019	10	weiss	Andrena vaga	f	4.26
Out	2019-04-12	2019	10	weiss	Andrena vaga	f	4.2
Out	2019-04-12	2019	10	weiss	Andrena vaga	f	4.19
Out	2019-04-12	2019	10	weiss	Andrena vaga	f	3.94
Out	2019-04-12	2019	10	weiss	Andrena vaga	f	4.63
Out	2019-04-12	2019	10	weiss	Andrena vaga	f	4.33
Out	2019-04-12	2019	10	weiss	Andrena vaga	f	4.38
Out	2019-04-12	2019	10	weiss	Andrena vaga	f	4.69
Out	2019-04-12	2019	10	weiss	Andrena vaga	f	4.14
Out	2019-04-12	2019	10	weiss	Andrena vaga	f	3.93
Out	2019-04-12	2019	10	weiss	Andrena vaga	f	4.17
Out	2019-04-12	2019	10	weiss	Andrena vaga	f	4.02
Out	2019-04-12	2019	10	weiss	Andrena vaga	f	3.66
Out	2019-04-12	2019	10	weiss	Andrena vaga	f	4.01
Out	2019-04-12	2019	10	weiss	Andrena vaga	f	4.17
Out	2019-04-12	2019	10	weiss	Andrena vaga	f	4.13
Out	2019-04-12	2019	10	weiss	Andrena vaga	f	3.71
Out	2019-04-12	2019	10	weiss	Andrena vaga	f	4.14
Out	2019-04-12	2019	10	weiss	Andrena vaga	f	4.46
Out	2019-04-12	2019	10	weiss	Andrena vaga	f	4.07
Out	2019-04-12	2019	10	gelb	Andrena vaga	f	4.39
Out	2019-04-12	2019	10	gelb	Andrena vaga	f	4.3
Out	2019-04-12	2019	10	gelb	Andrena vaga	f	4.37
Out	2019-04-12	2019	10	gelb	Andrena vaga	f	4.67
Out	2019-04-12	2019	10	gelb	Andrena vaga	f	4.44
Out	2019-04-12	2019	10	gelb	Andrena vaga	f	4.13
Out	2019-04-12	2019	10	blau	Andrena vaga	f	4.35
Out	2019-04-12	2019	12	gelb	Andrena vaga	f	4.31
Out	2019-04-15	2019	10	gelb	Andrena vaga	f	4.27
Out	2019-04-15	2019	10	gelb	Andrena vaga	f	4.37
Out	2019-04-15	2019	10	gelb	Andrena vaga	f	4.3
Out	2019-04-15	2019	10	gelb	Andrena vaga	f	4.51
Out	2019-04-15	2019	10	gelb	Andrena vaga	f	4.22
Out	2019-04-15	2019	10	gelb	Andrena vaga	f	3.95
Out	2019-04-15	2019	10	blau	Andrena vaga	f	4.66
Out	2019-04-15	2019	10	blau	Andrena vaga	f	4.03
Out	2019-04-15	2019	10	blau	Andrena vaga	f	3.77
Out	2019-04-15	2019	11	weiss	Andrena vaga	f	4.45
Out	2019-04-15	2019	11	weiss	Andrena vaga	f	4.11
Out	2019-04-15	2019	11	gelb	Andrena vaga	f	4.06
Out	2019-04-15	2019	12	gelb	Andrena vaga	f	4.24
Out	2019-04-18	2019	10	gelb	Andrena vaga	f	3.97
Out	2019-04-18	2019	10	gelb	Andrena vaga	f	4.03
Out	2019-04-18	2019	10	gelb	Andrena vaga	f	4.3
Out	2019-04-18	2019	11	blau	Andrena vaga	f	4.09
Out	2019-04-23	2019	9	weiss	Osmia cornuta	m	3.79
Out	2019-04-23	2019	9	weiss	Osmia cornuta	m	3.99
Out	2019-04-23	2019	9	weiss	Osmia cornuta	m	4.41
Out	2019-05-03	2019	11	gelb	Andrena vaga	f	4.09
Out	2019-05-06	2019	12	gelb	Andrena vaga	f	4.02
Out	2019-05-10	2019	10	gelb	Andrena vaga	f	4.39
Out	2019-05-13	2019	10	gelb	Andrena vaga	f	4.18
Out	2019-05-13	2019	11	weiss	Andrena vaga	f	4.19
Out	2019-05-17	2019	10	gelb	Andrena vaga	f	4.04
Out	2019-05-17	2019	10	gelb	Andrena vaga	f	4.14
Out	2019-05-17	2019	10	gelb	Andrena vaga	f	4.02
Out	2019-05-17	2019	10	gelb	Andrena vaga	f	4.17
Out	2019-05-17	2019	10	gelb	Andrena vaga	f	3.83
Out	2017-04-13	2017	9	blau	Bombus sylvarum	f	6.71
Out	2017-04-13	2017	9	gelb	Andrena haemorrhoa	f	3.54
Out	2017-04-13	2017	9	gelb	Osmia bicornis	m	3.66
Out	2017-04-13	2017	9	gelb	Osmia bicornis	m	3.84
Out	2017-04-13	2017	9	gelb	Osmia cornuta	m	4.07
Out	2017-04-13	2017	9	weiss	Lasioglossum pauxillum	f	1.77
Out	2017-04-13	2017	10	gelb	Andrena haemorrhoa	f	3.16
Out	2017-04-13	2017	10	gelb	Andrena vaga	f	3.74
Out	2017-04-13	2017	10	gelb	Apis mellifera	w	3.96
Out	2017-04-13	2017	10	gelb	Lasioglossum calceatum	f	2.81
Out	2017-04-13	2017	10	gelb	Lasioglossum malachurum	f	2.37
Out	2017-04-13	2017	10	weiss	Lasioglossum malachurum	f	2.36
Out	2017-04-13	2017	11	gelb	Andrena vaga	f	3.89
Out	2018-04-09	2018	11	gelb	Lasioglossum malachurum	f	2.63
Out	2018-04-09	2018	11	weiss	Andrena vaga	f	4.2
Out	2018-04-09	2018	11	weiss	Andrena vaga	f	3.87
Out	2018-04-09	2018	11	weiss	Andrena vaga	m	4.29
Out	2018-04-09	2018	11	weiss	Andrena vaga	m	3.35
Out	2018-04-09	2018	11	weiss	Andrena vaga	m	2.71
Out	2018-04-09	2018	11	weiss	Colletes cunicularius	f	5.06
Out	2018-04-09	2018	11	weiss	Colletes cunicularius	f	5.01
Out	2018-04-09	2018	11	weiss	Colletes cunicularius	m	4.19
Out	2018-04-09	2018	11	weiss	Colletes cunicularius	m	4.19
Out	2018-04-09	2018	11	weiss	Colletes cunicularius	m	4.37
Out	2018-04-09	2018	11	weiss	Colletes cunicularius	m	4.12
Out	2018-04-09	2018	11	weiss	Colletes cunicularius	m	4.79
Out	2018-04-09	2018	11	weiss	Colletes cunicularius	m	4.31
Out	2018-04-09	2018	11	weiss	Colletes cunicularius	m	4.17
Out	2018-04-09	2018	11	weiss	Colletes cunicularius	m	3.98
Out	2018-04-09	2018	11	weiss	Colletes cunicularius	m	3.84
Out	2018-04-09	2018	11	weiss	Colletes cunicularius	m	4.23
Out	2018-04-09	2018	11	weiss	Colletes cunicularius	m	4.4
Out	2018-04-09	2018	11	weiss	Colletes cunicularius	m	4.1
Out	2018-04-09	2018	11	weiss	Colletes cunicularius	m	4.3
Out	2018-04-09	2018	11	weiss	Colletes cunicularius	m	4.05
Out	2019-04-08	2019	9	gelb	Andrena vaga	m	3.27
Out	2019-04-08	2019	10	weiss	Andrena vaga	m	3.22
Out	2019-04-08	2019	10	weiss	Andrena vaga	m	3.62
Out	2019-04-08	2019	10	weiss	Andrena vaga	m	3.33
Out	2019-04-08	2019	10	gelb	Andrena vaga	m	3.24
Out	2019-04-08	2019	10	gelb	Andrena vaga	m	3.4
Out	2019-04-08	2019	10	gelb	Andrena vaga	m	3.15
Out	2019-04-08	2019	10	gelb	Andrena vaga	m	3.36
Out	2019-04-08	2019	11	weiss	Andrena vaga	m	3.37
Out	2019-04-08	2019	11	weiss	Andrena vaga	m	3.32
Out	2019-04-08	2019	11	weiss	Andrena vaga	m	3.55
Out	2019-04-08	2019	11	gelb	Andrena vaga	m	4.04
Out	2019-04-12	2019	10	weiss	Andrena vaga	m	3.58
Out	2019-04-12	2019	10	weiss	Andrena vaga	m	3.68
Out	2019-04-12	2019	10	weiss	Andrena vaga	m	3.42
Out	2019-04-12	2019	10	weiss	Andrena vaga	m	2.89
Out	2019-04-12	2019	10	weiss	Andrena vaga	m	3.48
Out	2019-04-12	2019	10	gelb	Andrena vaga	m	3.5
Out	2019-04-12	2019	10	gelb	Andrena vaga	m	3.47
Out	2019-04-12	2019	10	gelb	Andrena vaga	m	3.35
Out	2019-04-12	2019	11	gelb	Andrena vaga	m	2.95
Out	2019-04-12	2019	11	gelb	Andrena vaga	m	3.6
Out	2019-04-15	2019	10	gelb	Andrena vaga	m	3.16
Out	2019-04-15	2019	10	blau	Andrena vaga	m	3.35
Out	2019-04-15	2019	11	weiss	Andrena vaga	m	3.28
Out	2019-04-18	2019	9	gelb	Andrena vaga	m	3.22
Out	2019-04-18	2019	10	weiss	Andrena vaga	m	3.47
Out	2019-04-18	2019	10	weiss	Andrena vaga	m	3.12
Out	2019-04-18	2019	10	weiss	Andrena vaga	m	3.13
Out	2019-04-18	2019	10	weiss	Andrena vaga	m	3.27
Out	2019-04-18	2019	10	weiss	Andrena vaga	m	3.05
Out	2019-04-18	2019	10	weiss	Andrena vaga	m	3.08
Out	2019-04-18	2019	10	weiss	Andrena vaga	m	2.66
Out	2019-04-18	2019	10	weiss	Andrena vaga	m	2.8
Out	2019-04-18	2019	10	gelb	Andrena vaga	m	3.23
Out	2019-04-18	2019	10	gelb	Andrena vaga	m	3.39
Out	2019-04-18	2019	10	gelb	Andrena vaga	m	3.11
Out	2019-04-18	2019	10	gelb	Andrena vaga	m	3.55
Out	2019-04-18	2019	11	weiss	Andrena vaga	m	3.31
Out	2019-04-18	2019	11	weiss	Andrena vaga	m	3.55
Out	2019-04-18	2019	11	weiss	Andrena vaga	m	3.13
Out	2019-04-18	2019	11	weiss	Andrena vaga	m	3.24
Out	2019-04-18	2019	11	gelb	Andrena vaga	m	3.1
Out	2019-04-18	2019	11	gelb	Andrena vaga	m	3.13
Out	2019-04-18	2019	11	gelb	Andrena vaga	m	3.1
Out	2019-04-18	2019	11	blau	Andrena vaga	m	2.99
Out	2016-05-20	2016	12	gelb	Apis mellifera	w	4.06
Out	2016-05-20	2016	12	gelb	Halictus scabiosae	f	3.59
Out	2016-05-20	2016	12	gelb	Lasioglossum malachurum	f	2.42
Out	2016-05-20	2016	12	weiss	Apis mellifera	w	4.11
Out	2016-05-23	2016	9	weiss	Lasioglossum malachurum	f	2.51
Out	2016-05-23	2016	10	gelb	Apis mellifera	w	4.37
Out	2016-05-23	2016	10	weiss	Apis mellifera	w	4.39
Out	2016-05-23	2016	10	weiss	Halictus simplex-Gruppe	f	3.1
Out	2016-05-23	2016	11	blau	Halictus simplex-Gruppe	f	2.73
Out	2016-05-23	2016	11	gelb	Halictus simplex-Gruppe	f	3
Out	2016-05-23	2016	11	gelb	Lasioglossum calceatum	f	2.61
Out	2016-05-23	2016	11	gelb	Lasioglossum zonulum	f	2.69
Out	2016-05-23	2016	11	weiss	Lasioglossum calceatum	f	2.8
Out	2016-05-23	2016	12	gelb	Apis mellifera	w	3.81
Out	2016-05-23	2016	12	gelb	Apis mellifera	w	4.4
Out	2016-05-23	2016	12	gelb	Apis mellifera	w	3.95
Out	2016-05-27	2016	9	blau	Colletes cunicularius	f	4.89
Out	2016-05-27	2016	9	gelb	Andrena humilis	f	3.42
Out	2016-05-27	2016	9	gelb	Andrena humilis	f	3.09
Out	2016-05-27	2016	9	gelb	Andrena humilis	f	3.18
Out	2016-05-27	2016	9	gelb	Andrena humilis	f	3.21
Out	2016-05-27	2016	9	gelb	Apis mellifera	w	4.16
Out	2016-05-27	2016	9	gelb	Halictus simplex-Gruppe	f	2.73
Out	2016-05-27	2016	9	gelb	Halictus tumulorum	f	2.1
Out	2016-05-27	2016	9	gelb	Lasioglossum leucozonium	f	2.65
Out	2016-05-27	2016	9	weiss	Andrena humilis	f	3.26
Out	2016-05-27	2016	9	weiss	Colletes cunicularius	f	4.67
Out	2016-05-27	2016	9	weiss	Halictus simplex-Gruppe	f	2.91
Out	2016-05-27	2016	9	weiss	Halictus simplex-Gruppe	f	2.91
Out	2016-05-27	2016	9	weiss	Halictus simplex-Gruppe	f	2.98
Out	2016-05-27	2016	9	weiss	Lasioglossum albipes	f	2.21
Out	2016-05-27	2016	10	gelb	Andrena humilis	f	3.25
Out	2016-05-27	2016	10	gelb	Apis mellifera	w	4.27
Out	2016-05-27	2016	10	gelb	Apis mellifera	w	4.07
Out	2016-05-27	2016	10	weiss	Andrena minutula	f	1.96
Out	2016-05-27	2016	10	weiss	Apis mellifera	w	4.13
Out	2016-05-27	2016	10	weiss	Apis mellifera	w	4.1
Out	2016-05-27	2016	10	weiss	Apis mellifera	w	3.95
Out	2016-05-27	2016	10	weiss	Colletes cunicularius	f	4.21
Out	2016-05-27	2016	10	weiss	Halictus simplex-Gruppe	f	3.18
Out	2016-05-27	2016	10	weiss	Halictus simplex-Gruppe	f	3
Out	2016-05-27	2016	10	weiss	Lasioglossum lativentre	f	2.29
Out	2016-05-27	2016	11	gelb	Andrena humilis	f	3.33
Out	2016-05-27	2016	11	gelb	Apis mellifera	w	4.27
Out	2016-05-27	2016	11	gelb	Apis mellifera	w	3.94
Out	2016-05-27	2016	11	gelb	Halictus scabiosae	f	3.7
Out	2016-05-27	2016	11	gelb	Halictus scabiosae	f	3.88
Out	2016-05-27	2016	11	gelb	Halictus scabiosae	f	3.76
Out	2016-05-27	2016	11	gelb	Halictus simplex-Gruppe	f	3.09
Out	2016-05-27	2016	11	gelb	Lasioglossum calceatum	f	2.36
Out	2016-05-27	2016	11	gelb	Lasioglossum malachurum	f	2.42
Out	2016-05-27	2016	11	weiss	Halictus simplex-Gruppe	f	2.75
Out	2016-05-27	2016	11	weiss	Lasioglossum pallens	f	2.45
Out	2016-05-27	2016	11	weiss	Lasioglossum zonulum	f	2.86
Out	2016-05-27	2016	12	blau	Apis mellifera	w	4.37
Out	2016-05-27	2016	12	gelb	Andrena humilis	f	3.25
Out	2016-05-27	2016	12	gelb	Apis mellifera	w	4.35
Out	2016-05-27	2016	12	gelb	Halictus simplex-Gruppe	f	2.74
Out	2016-05-27	2016	12	gelb	Halictus simplex-Gruppe	f	2.52
Out	2016-05-27	2016	12	gelb	Lasioglossum leucozonium	f	2.7
Out	2016-05-27	2016	12	gelb	Lasioglossum malachurum	f	2.56
Out	2016-05-27	2016	12	weiss	Apis mellifera	w	4.35
Out	2016-05-27	2016	12	weiss	Halictus scabiosae	f	3.81
Out	2016-05-27	2016	12	weiss	Halictus simplex-Gruppe	f	3.05
Out	2016-05-27	2016	12	weiss	Halictus simplex-Gruppe	f	3.2
Out	2016-05-30	2016	9	gelb	Apis mellifera	w	3.99
Out	2016-05-30	2016	9	gelb	Lasioglossum malachurum	f	2.5
Out	2016-05-30	2016	9	gelb	Lasioglossum malachurum	f	2.38
Out	2016-05-30	2016	9	weiss	Andrena minutula	f	2.11
Out	2016-05-30	2016	9	weiss	Apis mellifera	w	4.44
Out	2016-05-30	2016	10	blau	Halictus tumulorum	f	2.04
Out	2016-05-30	2016	10	weiss	Apis mellifera	w	4.08
Out	2016-05-30	2016	10	weiss	Halictus simplex-Gruppe	f	2.88
Out	2016-05-30	2016	10	weiss	Lasioglossum glabriusculum	f	1.35
Out	2016-05-30	2016	10	weiss	Lasioglossum glabriusculum	f	1.52
Out	2016-05-30	2016	11	blau	Andrena haemorrhoa	f	3.5
Out	2016-05-30	2016	11	gelb	Andrena cineraria	f	3.79
Out	2016-05-30	2016	11	gelb	Colletes cunicularius	f	4.78
Out	2016-05-30	2016	11	gelb	Halictus scabiosae	f	3.7
Out	2016-05-30	2016	11	gelb	Lasioglossum zonulum	f	2.94
Out	2016-05-30	2016	11	weiss	Halictus simplex-Gruppe	f	3.06
Out	2016-05-30	2016	12	blau	Halictus simplex-Gruppe	f	3.07
Out	2016-05-30	2016	12	gelb	Andrena mitis	f	3.01
Out	2016-05-30	2016	12	gelb	Apis mellifera	w	4.18
Out	2016-05-30	2016	12	gelb	Apis mellifera	w	4.52
Out	2016-05-30	2016	12	gelb	Lasioglossum malachurum	f	2.55
Out	2016-05-30	2016	12	weiss	Apis mellifera	w	4.26
Out	2016-05-30	2016	12	weiss	Apis mellifera	w	4.08
Out	2016-05-30	2016	12	weiss	Halictus simplex-Gruppe	f	2.87
Out	2016-06-03	2016	9	gelb	Andrena haemorrhoa	f	3.33
Out	2016-06-03	2016	9	gelb	Andrena humilis	f	3.12
Out	2016-06-03	2016	9	gelb	Apis mellifera	w	4.18
Out	2016-06-03	2016	9	gelb	Apis mellifera	w	4.92
Out	2016-06-03	2016	9	gelb	Apis mellifera	w	4.5
Out	2016-06-03	2016	9	gelb	Apis mellifera	w	3.8
Out	2016-06-03	2016	9	gelb	Lasioglossum malachurum	f	2.47
Out	2017-04-13	2017	11	gelb	Andrena vaga	f	3.87
Out	2017-04-13	2017	11	gelb	Lasioglossum malachurum	f	2.4
Out	2017-04-13	2017	11	gelb	Lasioglossum malachurum	f	2.43
Out	2017-04-13	2017	11	gelb	Osmia bicornis	m	3.96
Out	2017-04-13	2017	12	gelb	Andrena vaga	f	3.89
Out	2017-04-13	2017	12	gelb	Lasioglossum malachurum	f	2.24
Out	2017-04-13	2017	12	gelb	Lasioglossum malachurum	f	2.42
Out	2017-04-13	2017	12	gelb	Lasioglossum malachurum	f	2.42
Out	2017-04-13	2017	12	gelb	Lasioglossum malachurum	f	2.45
Out	2017-04-13	2017	12	weiss	Bombus pascuorum	f	6.71
Out	2017-04-13	2017	12	weiss	Lasioglossum calceatum	f	2.52
Out	2017-04-18	2017	9	blau	Andrena minutula	f	2.01
Out	2017-04-18	2017	9	gelb	Andrena vaga	f	3.96
Out	2017-04-18	2017	9	gelb	Osmia cornuta	m	4.5
Out	2017-04-18	2017	9	weiss	Andrena minutula	f	1.92
Out	2017-04-18	2017	10	gelb	Apis mellifera	w	3.84
Out	2017-04-18	2017	10	weiss	Osmia cornuta	m	4.12
Out	2017-04-18	2017	11	blau	Andrena bicolor	f	2.81
Out	2017-04-18	2017	11	blau	Lasioglossum calceatum	f	2.76
Out	2017-04-18	2017	11	weiss	Andrena bicolor	f	2.91
Out	2017-04-18	2017	11	weiss	Colletes cunicularius	f	4.84
Out	2017-04-18	2017	12	gelb	Lasioglossum malachurum	f	2.43
Out	2017-04-18	2017	12	gelb	Osmia cornuta	m	4.09
Out	2017-04-18	2017	12	weiss	Bombus terrestris	f	8.01
Out	2017-04-21	2017	10	weiss	Colletes cunicularius	f	4.87
Out	2017-04-21	2017	11	gelb	Andrena vaga	f	4.19
Out	2017-04-24	2017	9	gelb	Andrena haemorrhoa	m	2.9
Out	2018-04-09	2018	11	weiss	Colletes cunicularius	m	4.01
Out	2019-04-08	2019	12	gelb	Apis mellifera	w	4.23
Out	2019-04-12	2019	10	gelb	Apis mellifera	w	3.98
Out	2019-04-18	2019	9	weiss	Apis mellifera	w	4.19
Out	2019-04-23	2019	9	weiss	Osmia cornuta	m	4.22
Out	2019-05-06	2019	9	gelb	Apis mellifera	w	4.59
Out	2019-05-13	2019	10	gelb	Apis mellifera	w	4
Out	2019-05-13	2019	11	weiss	Apis mellifera	w	3.96
Out	2019-05-13	2019	12	weiss	Apis mellifera	w	4.08
Out	2017-04-24	2017	9	weiss	Andrena cineraria	f	3.63
Out	2016-06-03	2016	9	weiss	Apis mellifera	w	4.34
Out	2017-04-24	2017	9	weiss	Andrena haemorrhoa	m	2.54
Out	2018-04-09	2018	11	weiss	Colletes cunicularius	m	4.04
Out	2018-04-09	2018	11	weiss	Colletes cunicularius	m	4.54
Out	2016-06-03	2016	9	weiss	Apis mellifera	w	4.04
Out	2017-04-24	2017	9	weiss	Andrena minutula	f	2.22
Out	2017-04-24	2017	9	weiss	Andrena minutula	f	2.09
Out	2016-06-03	2016	9	weiss	Lasioglossum pauxillum	f	1.63
Out	2016-06-03	2016	10	gelb	Apis mellifera	w	4.22
Out	2018-04-09	2018	11	weiss	Colletes cunicularius	m	3.79
Out	2017-04-24	2017	9	weiss	Andrena minutula	f	1.97
Out	2017-04-24	2017	9	weiss	Andrena minutula	f	2.01
Out	2019-04-23	2019	9	weiss	Osmia cornuta	m	4.33
Out	2016-06-03	2016	10	gelb	Apis mellifera	w	4.3
Out	2016-06-03	2016	10	gelb	Apis mellifera	w	4.17
Out	2016-06-03	2016	10	weiss	Apis mellifera	w	3.94
Out	2016-06-03	2016	10	weiss	Apis mellifera	w	3.99
Out	2016-06-03	2016	10	weiss	Halictus simplex-Gruppe	f	2.74
Out	2017-04-24	2017	9	weiss	Andrena minutula	f	2.05
Out	2017-04-24	2017	9	weiss	Andrena minutula	f	2.18
Out	2017-04-24	2017	9	weiss	Bombus terrestris	f	8.55
Out	2017-04-24	2017	9	weiss	Halictus tumulorum	f	1.98
Out	2017-04-24	2017	9	weiss	Osmia cornuta	m	3.97
Out	2017-04-24	2017	10	gelb	Andrena bucephala	f	3.22
Out	2017-04-24	2017	10	gelb	Andrena minutula	f	2.2
Out	2017-04-24	2017	10	gelb	Andrena vaga	f	4.06
Out	2017-04-24	2017	10	gelb	Andrena vaga	f	4.09
Out	2017-04-24	2017	10	gelb	Andrena vaga	f	4.25
Out	2017-04-24	2017	10	gelb	Andrena vaga	f	3.75
Out	2017-04-24	2017	10	gelb	Colletes cunicularius	f	5.03
Out	2017-04-24	2017	10	gelb	Lasioglossum malachurum	f	2.35
Out	2017-04-24	2017	10	gelb	Lasioglossum malachurum	f	2.5
Out	2018-04-09	2018	11	weiss	Colletes cunicularius	m	3.96
Out	2018-04-09	2018	11	weiss	Colletes cunicularius	m	4.28
Out	2018-04-09	2018	11	weiss	Colletes cunicularius	m	4.27
Out	2018-04-09	2018	11	weiss	Colletes cunicularius	m	4.08
Out	2018-04-09	2018	11	weiss	Colletes cunicularius	m	4.01
Out	2018-04-09	2018	11	weiss	Colletes cunicularius	m	4.31
Out	2018-04-09	2018	11	weiss	Colletes cunicularius	m	4.15
Out	2018-04-09	2018	11	weiss	Colletes cunicularius	m	4.11
Out	2018-04-09	2018	11	weiss	Colletes cunicularius	m	4.18
Out	2018-04-09	2018	11	weiss	Lasioglossum calceatum	f	2.56
Out	2018-04-09	2018	11	weiss	Lasioglossum calceatum	f	2.95
Out	2019-04-08	2019	9	weiss	Colletes cunicularius	f	5.16
Out	2019-04-08	2019	9	weiss	Colletes cunicularius	f	5.08
Out	2019-04-08	2019	9	weiss	Colletes cunicularius	f	4.84
Out	2019-04-08	2019	9	blau	Colletes cunicularius	f	4.74
Out	2019-04-08	2019	9	blau	Colletes cunicularius	f	4.67
Out	2019-04-08	2019	9	blau	Colletes cunicularius	f	5.1
Out	2019-04-08	2019	10	weiss	Colletes cunicularius	f	4.87
Out	2019-04-12	2019	10	weiss	Colletes cunicularius	f	5.04
Out	2019-04-12	2019	10	gelb	Colletes cunicularius	f	4.94
Out	2019-04-12	2019	10	gelb	Colletes cunicularius	f	4.63
Out	2019-04-12	2019	10	gelb	Colletes cunicularius	f	5.07
Out	2019-04-18	2019	11	blau	Colletes cunicularius	f	4.88
Out	2019-04-23	2019	9	weiss	Andrena flavipes	m	2.35
Out	2019-05-10	2019	9	weiss	Colletes cunicularius	f	5.07
Out	2019-05-10	2019	11	weiss	Colletes cunicularius	f	4.45
Out	2019-05-10	2019	11	gelb	Colletes cunicularius	f	4.62
Out	2019-05-13	2019	9	weiss	Colletes cunicularius	f	4.76
Out	2019-05-13	2019	10	weiss	Colletes cunicularius	f	4.82
Out	2019-05-17	2019	9	blau	Colletes cunicularius	f	4.76
Out	2019-05-22	2019	12	weiss	Colletes cunicularius	f	4.75
Out	2018-04-09	2018	11	weiss	Lasioglossum calceatum	f	2.75
Out	2018-04-09	2018	11	weiss	Lasioglossum calceatum	f	2.71
Out	2018-04-09	2018	11	weiss	Lasioglossum calceatum	f	2.63
Out	2018-04-09	2018	11	weiss	Lasioglossum malachurum	f	2.48
Out	2018-04-09	2018	11	weiss	Lasioglossum malachurum	f	2.3
Out	2018-04-09	2018	11	weiss	Lasioglossum malachurum	f	2.36
Out	2018-04-09	2018	11	weiss	Lasioglossum malachurum	f	2.4
Out	2018-04-09	2018	11	weiss	Lasioglossum malachurum	f	2.54
Out	2018-04-09	2018	11	weiss	Lasioglossum malachurum	f	2.54
Out	2018-04-09	2018	11	weiss	Lasioglossum malachurum	f	2.47
Out	2018-04-09	2018	11	weiss	Lasioglossum malachurum	f	2.48
Out	2018-04-09	2018	12	blau	Andrena nitida	f	4.19
Out	2018-04-09	2018	12	blau	Lasioglossum malachurum	f	2.25
Out	2018-04-09	2018	12	blau	Lasioglossum malachurum	f	2.31
Out	2018-04-09	2018	12	blau	Lasioglossum malachurum	f	2.44
Out	2018-04-09	2018	12	blau	Lasioglossum malachurum	f	2.43
Out	2018-04-09	2018	12	blau	Lasioglossum malachurum	f	2.59
Out	2018-04-09	2018	12	blau	Osmia bicornis	m	3.72
Out	2018-04-09	2018	12	gelb	Colletes cunicularius	m	4.15
Out	2018-04-09	2018	12	gelb	Colletes cunicularius	m	4.04
Out	2018-04-09	2018	12	gelb	Colletes cunicularius	m	4.39
Out	2018-04-09	2018	12	gelb	Colletes cunicularius	m	4.14
Out	2018-04-09	2018	12	gelb	Lasioglossum malachurum	f	2.55
Out	2018-04-09	2018	12	gelb	Lasioglossum malachurum	f	2.57
Out	2018-04-09	2018	12	weiss	Lasioglossum laticeps	f	2.224
Out	2018-04-13	2018	9	blau	Andrena haemorrhoa	m	2.79
Out	2018-04-13	2018	9	blau	Colletes cunicularius	m	4.09
Out	2018-04-13	2018	9	blau	Lasioglossum malachurum	f	2.38
Out	2018-04-13	2018	9	blau	Lasioglossum malachurum	f	2.53
Out	2018-04-13	2018	9	weiss	Lasioglossum calceatum	f	2.8
Out	2018-04-13	2018	9	weiss	Lasioglossum calceatum	f	2.93
Out	2018-04-13	2018	9	weiss	Lasioglossum malachurum	f	2.59
Out	2018-04-13	2018	10	blau	Andrena flavipes	f	3.32
Out	2018-04-13	2018	10	blau	Colletes cunicularius	m	3.96
Out	2018-04-13	2018	10	blau	Colletes cunicularius	m	4.15
Out	2018-04-13	2018	10	blau	Colletes cunicularius	m	4.37
Out	2018-04-13	2018	10	blau	Colletes cunicularius	m	4.22
Out	2018-04-13	2018	10	blau	Colletes cunicularius	m	3.91
Out	2018-04-13	2018	10	blau	Colletes cunicularius	m	4.01
Out	2018-04-13	2018	10	blau	Colletes cunicularius	m	4.16
Out	2018-04-13	2018	10	blau	Colletes cunicularius	m	4.27
Out	2018-04-13	2018	10	blau	Colletes cunicularius	m	4.02
Out	2018-04-13	2018	10	blau	Colletes cunicularius	m	4.21
Out	2018-04-13	2018	10	blau	Colletes cunicularius	m	4.13
Out	2018-04-13	2018	10	blau	Colletes cunicularius	m	3.73
Out	2018-04-13	2018	10	blau	Colletes cunicularius	m	4.21
Out	2018-04-13	2018	10	gelb	Andrena cineraria	m	3.09
Out	2018-04-13	2018	10	gelb	Andrena vaga	f	4.36
Out	2018-04-13	2018	10	gelb	Andrena vaga	f	4.09
Out	2018-04-13	2018	10	gelb	Andrena vaga	f	4.04
Out	2018-04-13	2018	10	gelb	Andrena vaga	f	4.25
Out	2018-04-13	2018	10	gelb	Andrena vaga	m	3.08
Out	2018-04-13	2018	10	gelb	Andrena vaga	m	3.21
Out	2018-04-13	2018	10	gelb	Andrena vaga	m	3.33
Out	2018-04-13	2018	10	gelb	Andrena vaga	m	2.81
Out	2018-04-13	2018	10	gelb	Colletes cunicularius	m	4.62
Out	2018-04-13	2018	10	gelb	Colletes cunicularius	m	4.34
Out	2018-04-13	2018	10	gelb	Colletes cunicularius	m	4.17
Out	2018-04-13	2018	10	gelb	Colletes cunicularius	m	4.24
Out	2018-04-13	2018	10	gelb	Colletes cunicularius	m	4.12
Out	2018-04-13	2018	10	gelb	Colletes cunicularius	m	4.5
Out	2018-04-13	2018	10	gelb	Colletes cunicularius	m	4.16
Out	2018-04-13	2018	10	gelb	Colletes cunicularius	m	4.16
Out	2018-04-13	2018	10	gelb	Colletes cunicularius	m	3.79
Out	2018-04-13	2018	10	gelb	Colletes cunicularius	m	4.1
Out	2018-04-13	2018	10	gelb	Colletes cunicularius	m	4.18
Out	2018-04-13	2018	10	gelb	Colletes cunicularius	m	4.39
Out	2018-04-13	2018	10	gelb	Colletes cunicularius	m	4.07
Out	2018-04-13	2018	10	gelb	Colletes cunicularius	m	4.2
Out	2018-04-13	2018	10	gelb	Colletes cunicularius	m	3.92
Out	2018-04-13	2018	10	gelb	Colletes cunicularius	m	4.12
Out	2018-04-13	2018	10	gelb	Colletes cunicularius	m	3.71
Out	2018-04-13	2018	10	gelb	Colletes cunicularius	m	4.38
Out	2018-04-13	2018	10	gelb	Colletes cunicularius	m	3.97
Out	2018-04-13	2018	10	gelb	Colletes cunicularius	m	4.16
Out	2018-04-13	2018	10	gelb	Colletes cunicularius	m	4.17
Out	2018-04-13	2018	10	gelb	Colletes cunicularius	m	4.07
Out	2018-04-13	2018	10	gelb	Colletes cunicularius	m	4.06
Out	2018-04-13	2018	10	gelb	Colletes cunicularius	m	4.26
Out	2018-04-13	2018	10	gelb	Colletes cunicularius	m	3.36
Out	2018-04-13	2018	10	gelb	Colletes cunicularius	m	4.41
Out	2018-04-13	2018	10	gelb	Colletes cunicularius	m	4.41
Out	2018-04-13	2018	10	gelb	Colletes cunicularius	m	4.38
Out	2018-04-13	2018	10	gelb	Colletes cunicularius	m	3.85
Out	2018-04-13	2018	10	gelb	Colletes cunicularius	m	4.72
Out	2018-04-13	2018	10	gelb	Colletes cunicularius	m	3.92
Out	2018-04-13	2018	10	gelb	Colletes cunicularius	m	4.36
Out	2018-04-13	2018	10	gelb	Colletes cunicularius	m	4.19
Out	2018-04-13	2018	10	gelb	Colletes cunicularius	m	4.01
Out	2018-04-13	2018	10	gelb	Colletes cunicularius	m	4.08
Out	2018-04-13	2018	10	gelb	Colletes cunicularius	m	4.15
Out	2018-04-13	2018	10	gelb	Colletes cunicularius	m	4.22
Out	2018-04-13	2018	10	gelb	Colletes cunicularius	m	4.04
Out	2018-04-13	2018	10	gelb	Colletes cunicularius	m	4.2
Out	2018-04-13	2018	10	gelb	Colletes cunicularius	m	4.09
Out	2018-04-13	2018	10	gelb	Colletes cunicularius	m	4.08
Out	2018-04-13	2018	10	gelb	Colletes cunicularius	m	4.4
Out	2018-04-13	2018	10	gelb	Colletes cunicularius	m	3.85
Out	2018-04-13	2018	10	gelb	Colletes cunicularius	m	3.98
Out	2018-04-13	2018	10	gelb	Colletes cunicularius	m	3.99
Out	2018-04-13	2018	10	gelb	Colletes cunicularius	m	4.07
Out	2018-04-13	2018	10	gelb	Colletes cunicularius	m	4.13
Out	2018-04-13	2018	10	gelb	Colletes cunicularius	m	3.88
Out	2018-04-13	2018	10	gelb	Colletes cunicularius	m	4.35
Out	2018-04-13	2018	10	gelb	Colletes cunicularius	m	4.24
Out	2018-04-13	2018	10	gelb	Colletes cunicularius	m	3.85
Out	2018-04-13	2018	10	gelb	Colletes cunicularius	m	4.79
Out	2018-04-13	2018	10	gelb	Colletes cunicularius	m	3.85
Out	2018-04-13	2018	10	gelb	Colletes cunicularius	m	3.89
Out	2018-04-13	2018	10	gelb	Colletes cunicularius	m	3.9
Out	2018-04-13	2018	10	gelb	Colletes cunicularius	m	4.21
Out	2018-04-13	2018	10	gelb	Colletes cunicularius	m	4.33
Out	2018-04-13	2018	10	gelb	Colletes cunicularius	m	4.18
Out	2018-04-13	2018	10	gelb	Colletes cunicularius	m	3.95
Out	2018-04-13	2018	10	gelb	Colletes cunicularius	m	3.96
Out	2018-04-13	2018	10	gelb	Colletes cunicularius	m	4.6
Out	2018-04-13	2018	10	gelb	Colletes cunicularius	m	3.54
Out	2018-04-13	2018	10	gelb	Colletes cunicularius	m	4.1
Out	2018-04-13	2018	10	gelb	Colletes cunicularius	m	4.44
Out	2018-04-13	2018	10	gelb	Colletes cunicularius	m	4.57
Out	2018-04-13	2018	10	gelb	Colletes cunicularius	m	4.03
Out	2018-04-13	2018	10	gelb	Colletes cunicularius	m	4.19
Out	2018-04-13	2018	10	gelb	Colletes cunicularius	m	4.65
Out	2018-04-13	2018	10	gelb	Colletes cunicularius	m	4
Out	2018-04-13	2018	10	gelb	Colletes cunicularius	m	4.42
Out	2018-04-13	2018	10	gelb	Colletes cunicularius	m	4.18
Out	2018-04-13	2018	10	gelb	Colletes cunicularius	m	4.07
Out	2018-04-13	2018	10	gelb	Colletes cunicularius	m	4.28
Out	2018-04-13	2018	10	gelb	Colletes cunicularius	m	4.14
Out	2018-04-13	2018	10	gelb	Colletes cunicularius	m	3.72
Out	2018-04-13	2018	10	gelb	Colletes cunicularius	m	4.46
Out	2018-04-13	2018	10	gelb	Colletes cunicularius	m	4.06
Out	2018-04-13	2018	10	gelb	Colletes cunicularius	m	4.25
Out	2018-04-13	2018	10	gelb	Colletes cunicularius	m	3.88
Out	2018-04-13	2018	10	gelb	Colletes cunicularius	m	4.11
Out	2018-04-13	2018	10	gelb	Colletes cunicularius	m	3.65
Out	2018-04-13	2018	10	gelb	Colletes cunicularius	m	4.01
Out	2018-04-13	2018	10	gelb	Colletes cunicularius	m	4.19
Out	2018-04-13	2018	10	gelb	Colletes cunicularius	m	4.53
Out	2018-04-13	2018	10	gelb	Colletes cunicularius	m	4.13
Out	2018-04-13	2018	10	gelb	Colletes cunicularius	m	4.14
Out	2018-04-13	2018	10	gelb	Colletes cunicularius	m	4.36
Out	2018-04-13	2018	10	gelb	Colletes cunicularius	m	4.11
Out	2018-04-13	2018	10	gelb	Colletes cunicularius	m	3.98
Out	2018-04-13	2018	10	gelb	Colletes cunicularius	m	4.17
Out	2018-04-13	2018	10	gelb	Colletes cunicularius	m	4.09
Out	2018-04-13	2018	10	gelb	Colletes cunicularius	m	4.45
Out	2018-04-13	2018	10	gelb	Colletes cunicularius	m	4.34
Out	2018-04-13	2018	10	gelb	Colletes cunicularius	m	4.04
Out	2018-04-13	2018	10	gelb	Colletes cunicularius	m	3.81
Out	2018-04-13	2018	10	gelb	Colletes cunicularius	m	4.25
Out	2018-04-13	2018	10	gelb	Colletes cunicularius	m	4
Out	2018-04-13	2018	10	gelb	Colletes cunicularius	m	3.96
Out	2018-04-13	2018	10	gelb	Colletes cunicularius	m	3.79
Out	2018-04-13	2018	10	gelb	Colletes cunicularius	m	4.34
Out	2018-04-13	2018	10	gelb	Colletes cunicularius	m	3.77
Out	2018-04-13	2018	10	gelb	Colletes cunicularius	m	3.85
Out	2018-04-13	2018	10	gelb	Colletes cunicularius	m	4.29
Out	2018-04-13	2018	10	gelb	Colletes cunicularius	m	4.07
Out	2018-04-13	2018	10	gelb	Colletes cunicularius	m	4.63
Out	2018-04-13	2018	10	gelb	Colletes cunicularius	m	4.24
Out	2018-04-13	2018	10	gelb	Colletes cunicularius	m	4.49
Out	2018-04-13	2018	10	gelb	Colletes cunicularius	m	3.9
Out	2018-04-13	2018	10	gelb	Lasioglossum malachurum	f	2.46
Out	2018-04-13	2018	10	weiss	Andrena bicolor	f	2.58
Out	2018-04-13	2018	10	weiss	Andrena vaga	f	4.13
Out	2018-04-13	2018	10	weiss	Colletes cunicularius	m	3.84
Out	2018-04-13	2018	10	weiss	Colletes cunicularius	m	4.75
Out	2018-04-13	2018	10	weiss	Lasioglossum laticeps	f	2.06
Out	2018-04-13	2018	11	blau	Lasioglossum calceatum	f	2.77
Out	2018-04-13	2018	11	blau	Lasioglossum calceatum	f	2.92
Out	2018-04-13	2018	11	blau	Lasioglossum malachurum	f	2.56
Out	2018-04-13	2018	11	gelb	Andrena bicolor	f	3.03
Out	2018-04-13	2018	11	gelb	Andrena bicolor	f	2.82
Out	2018-04-13	2018	11	gelb	Andrena haemorrhoa	m	2.71
Out	2018-04-13	2018	11	gelb	Colletes cunicularius	m	4.45
Out	2018-04-13	2018	11	gelb	Colletes cunicularius	m	4.17
Out	2018-04-13	2018	11	gelb	Lasioglossum calceatum	f	2.71
Out	2018-04-13	2018	11	gelb	Lasioglossum malachurum	f	2.63
Out	2018-04-13	2018	11	gelb	Lasioglossum malachurum	f	2.67
Out	2018-04-13	2018	11	weiss	Andrena cineraria	m	3.11
Out	2018-04-13	2018	11	weiss	Andrena fulva	f	4.14
Out	2018-04-13	2018	11	weiss	Andrena haemorrhoa	m	2.79
Out	2018-04-13	2018	11	weiss	Andrena haemorrhoa	m	2.83
Out	2018-04-13	2018	11	weiss	Andrena haemorrhoa	m	2.7
Out	2018-04-13	2018	11	weiss	Andrena haemorrhoa	m	2.86
Out	2018-04-13	2018	11	weiss	Andrena haemorrhoa	m	2.79
Out	2018-04-13	2018	11	weiss	Andrena vaga	f	4.08
Out	2018-04-13	2018	11	weiss	Andrena vaga	m	2.87
Out	2018-04-13	2018	11	weiss	Colletes cunicularius	m	4.43
Out	2018-04-13	2018	11	weiss	Colletes cunicularius	m	4.26
Out	2018-04-13	2018	11	weiss	Colletes cunicularius	m	4.14
Out	2018-04-13	2018	11	weiss	Colletes cunicularius	m	4.43
Out	2018-04-13	2018	11	weiss	Colletes cunicularius	m	4.13
Out	2018-04-13	2018	11	weiss	Colletes cunicularius	m	4.26
Out	2018-04-13	2018	11	weiss	Colletes cunicularius	m	4.68
Out	2018-04-13	2018	11	weiss	Colletes cunicularius	m	4.22
Out	2018-04-13	2018	11	weiss	Colletes cunicularius	m	3.99
Out	2018-04-13	2018	11	weiss	Colletes cunicularius	m	4.06
Out	2018-04-13	2018	11	weiss	Colletes cunicularius	m	4.13
Out	2018-04-13	2018	11	weiss	Colletes cunicularius	m	3.96
Out	2018-04-13	2018	11	weiss	Colletes cunicularius	m	4.22
Out	2018-04-13	2018	11	weiss	Colletes cunicularius	m	3.99
Out	2018-04-13	2018	11	weiss	Colletes cunicularius	m	4.31
Out	2018-04-13	2018	11	weiss	Colletes cunicularius	m	4.08
Out	2018-04-13	2018	11	weiss	Colletes cunicularius	m	4.03
Out	2018-04-13	2018	11	weiss	Colletes cunicularius	m	4.31
Out	2018-04-13	2018	11	weiss	Colletes cunicularius	m	4.47
Out	2018-04-13	2018	11	weiss	Colletes cunicularius	m	4.27
Out	2018-04-13	2018	11	weiss	Colletes cunicularius	m	3.91
Out	2018-04-13	2018	11	weiss	Colletes cunicularius	m	4.28
Out	2018-04-13	2018	11	weiss	Colletes cunicularius	m	4.03
Out	2018-04-13	2018	11	weiss	Colletes cunicularius	m	4.27
Out	2018-04-13	2018	11	weiss	Colletes cunicularius	m	4.06
Out	2018-04-13	2018	11	weiss	Colletes cunicularius	m	4.42
Out	2018-04-13	2018	11	weiss	Colletes cunicularius	m	4.58
Out	2018-04-13	2018	11	weiss	Colletes cunicularius	m	4.38
Out	2018-04-13	2018	11	weiss	Colletes cunicularius	m	3.98
Out	2018-04-13	2018	11	weiss	Colletes cunicularius	m	4.39
Out	2018-04-13	2018	11	weiss	Colletes cunicularius	m	4.22
Out	2018-04-13	2018	11	weiss	Colletes cunicularius	m	4.23
Out	2018-04-13	2018	11	weiss	Colletes cunicularius	m	4.35
Out	2018-04-13	2018	11	weiss	Colletes cunicularius	m	3.95
Out	2018-04-13	2018	11	weiss	Colletes cunicularius	m	4.19
Out	2018-04-13	2018	11	weiss	Colletes cunicularius	m	4.02
Out	2018-04-13	2018	11	weiss	Colletes cunicularius	m	4.3
Out	2018-04-13	2018	11	weiss	Colletes cunicularius	m	4.67
Out	2018-04-13	2018	11	weiss	Colletes cunicularius	m	4.17
Out	2018-04-13	2018	11	weiss	Colletes cunicularius	m	4.7
Out	2018-04-13	2018	11	weiss	Colletes cunicularius	m	4.16
Out	2018-04-13	2018	11	weiss	Colletes cunicularius	m	3.77
Out	2018-04-13	2018	11	weiss	Colletes cunicularius	m	4.16
Out	2018-04-13	2018	11	weiss	Colletes cunicularius	m	4.45
Out	2018-04-13	2018	11	weiss	Colletes cunicularius	m	4.06
Out	2018-04-13	2018	11	weiss	Colletes cunicularius	m	4.36
Out	2018-04-13	2018	11	weiss	Colletes cunicularius	m	4.14
Out	2018-04-13	2018	11	weiss	Colletes cunicularius	m	3.93
Out	2018-04-13	2018	11	weiss	Colletes cunicularius	m	4.18
Out	2018-04-13	2018	11	weiss	Colletes cunicularius	m	4.04
Out	2018-04-13	2018	11	weiss	Colletes cunicularius	m	3.82
Out	2018-04-13	2018	11	weiss	Colletes cunicularius	m	4.3
Out	2018-04-13	2018	11	weiss	Colletes cunicularius	m	4.14
Out	2018-04-13	2018	11	weiss	Colletes cunicularius	m	3.3
Out	2018-04-13	2018	11	weiss	Lasioglossum calceatum	f	2.71
Out	2018-04-13	2018	11	weiss	Lasioglossum calceatum	f	2.9
Out	2018-04-13	2018	11	weiss	Lasioglossum calceatum	f	2.74
Out	2018-04-13	2018	11	weiss	Lasioglossum calceatum	f	2.7
Out	2018-04-13	2018	11	weiss	Lasioglossum malachurum	f	2.36
Out	2018-04-13	2018	11	weiss	Lasioglossum malachurum	f	2.57
Out	2018-04-13	2018	11	weiss	Lasioglossum malachurum	f	2.53
Out	2018-04-13	2018	11	weiss	Lasioglossum malachurum	f	2.36
Out	2018-04-13	2018	11	weiss	Lasioglossum malachurum	f	2.47
Out	2018-04-13	2018	11	weiss	Lasioglossum malachurum	f	2.52
Out	2018-04-13	2018	11	weiss	Lasioglossum malachurum	f	2.43
Out	2018-04-13	2018	11	weiss	Lasioglossum malachurum	f	2.4
Out	2018-04-13	2018	11	weiss	Lasioglossum malachurum	f	2.41
Out	2018-04-13	2018	11	weiss	Lasioglossum malachurum	f	2.38
Out	2018-04-13	2018	11	weiss	Lasioglossum malachurum	f	2.44
Out	2018-04-13	2018	12	blau	Lasioglossum calceatum	f	2.81
Out	2018-04-13	2018	12	blau	Lasioglossum calceatum	f	2.87
Out	2018-04-13	2018	12	blau	Lasioglossum calceatum	f	2.9
Out	2018-04-13	2018	12	blau	Lasioglossum malachurum	f	2.49
Out	2018-04-13	2018	12	blau	Lasioglossum malachurum	f	2.33
Out	2018-04-13	2018	12	blau	Osmia bicornis	m	3.27
Out	2018-04-13	2018	12	blau	Osmia bicornis	m	3.13
Out	2018-04-13	2018	12	gelb	Andrena fulvata	f	2.86
Out	2018-04-13	2018	12	gelb	Colletes cunicularius	m	4.54
Out	2018-04-13	2018	12	gelb	Colletes cunicularius	m	4.31
Out	2018-04-13	2018	12	gelb	Colletes cunicularius	m	4.19
Out	2018-04-13	2018	12	gelb	Colletes cunicularius	m	3.98
Out	2018-04-13	2018	12	gelb	Colletes cunicularius	m	4.74
Out	2018-04-13	2018	12	gelb	Colletes cunicularius	m	4.22
Out	2018-04-13	2018	12	gelb	Lasioglossum calceatum	f	2.68
Out	2018-04-13	2018	12	gelb	Lasioglossum calceatum	f	2.69
Out	2018-04-13	2018	12	gelb	Lasioglossum calceatum	f	2.57
Out	2018-04-13	2018	12	gelb	Lasioglossum malachurum	f	2.52
Out	2018-04-13	2018	12	gelb	Lasioglossum malachurum	f	2.69
Out	2018-04-13	2018	12	gelb	Osmia bicornis	m	2.75
Out	2018-04-13	2018	12	weiss	Andrena vaga	m	2.9
Out	2018-04-13	2018	12	weiss	Andrena vaga	m	2.72
Out	2018-04-13	2018	12	weiss	Colletes cunicularius	m	4.43
Out	2018-04-13	2018	12	weiss	Colletes cunicularius	m	4.39
Out	2018-04-13	2018	12	weiss	Colletes cunicularius	m	4.43
Out	2018-04-13	2018	12	weiss	Colletes cunicularius	m	4.29
Out	2018-04-13	2018	12	weiss	Colletes cunicularius	m	3.8
Out	2018-04-13	2018	12	weiss	Colletes cunicularius	m	3.99
Out	2018-04-13	2018	12	weiss	Colletes cunicularius	m	4.17
Out	2018-04-13	2018	12	weiss	Lasioglossum malachurum	f	2.44
Out	2018-04-13	2018	12	weiss	Lasioglossum malachurum	f	2.37
Out	2018-04-16	2018	9	blau	Bombus sylvarum	f	6.71
Out	2018-04-16	2018	9	blau	Colletes cunicularius	m	4.36
Out	2018-04-16	2018	9	blau	Colletes cunicularius	m	4.31
Out	2018-04-16	2018	9	blau	Colletes cunicularius	m	3.92
Out	2018-04-16	2018	9	blau	Lasioglossum calceatum	f	2.73
Out	2018-04-16	2018	9	gelb	Lasioglossum calceatum	f	3.05
Out	2018-04-16	2018	9	weiss	Colletes cunicularius	m	4.18
Out	2018-04-16	2018	9	weiss	Lasioglossum calceatum	f	2.68
Out	2018-04-16	2018	9	weiss	Lasioglossum calceatum	f	2.89
Out	2018-04-16	2018	10	gelb	Andrena vaga	f	3.95
Out	2018-04-16	2018	10	gelb	Colletes cunicularius	m	4.13
Out	2018-04-16	2018	10	gelb	Colletes cunicularius	m	4.29
Out	2018-04-16	2018	10	gelb	Colletes cunicularius	m	4.18
Out	2018-04-16	2018	10	gelb	Colletes cunicularius	m	3.82
Out	2018-04-16	2018	10	gelb	Colletes cunicularius	m	3.69
Out	2018-04-16	2018	10	gelb	Colletes cunicularius	m	4.05
Out	2018-04-16	2018	10	gelb	Colletes cunicularius	m	4.67
Out	2018-04-16	2018	10	gelb	Colletes cunicularius	m	4.29
Out	2018-04-16	2018	10	gelb	Colletes cunicularius	m	3.99
Out	2018-04-16	2018	10	gelb	Colletes cunicularius	m	4.16
Out	2018-04-16	2018	10	gelb	Colletes cunicularius	m	4.28
Out	2018-04-16	2018	10	gelb	Colletes cunicularius	m	4.21
Out	2018-04-16	2018	10	gelb	Colletes cunicularius	m	4.35
Out	2018-04-16	2018	10	gelb	Colletes cunicularius	m	4.22
Out	2018-04-16	2018	10	gelb	Colletes cunicularius	m	3.87
Out	2018-04-16	2018	10	gelb	Colletes cunicularius	m	3.96
Out	2018-04-16	2018	10	gelb	Colletes cunicularius	m	4.69
Out	2018-04-16	2018	10	gelb	Colletes cunicularius	m	3.89
Out	2018-04-16	2018	10	gelb	Colletes cunicularius	m	3.88
Out	2018-04-16	2018	10	gelb	Colletes cunicularius	m	3.9
Out	2018-04-16	2018	10	gelb	Colletes cunicularius	m	4.48
Out	2018-04-16	2018	10	gelb	Colletes cunicularius	m	3.95
Out	2018-04-16	2018	10	gelb	Colletes cunicularius	m	4.43
Out	2018-04-16	2018	10	gelb	Colletes cunicularius	m	3.88
Out	2018-04-16	2018	10	gelb	Colletes cunicularius	m	4.45
Out	2018-04-16	2018	10	gelb	Colletes cunicularius	m	4.32
Out	2018-04-16	2018	10	gelb	Colletes cunicularius	m	4.15
Out	2018-04-16	2018	10	gelb	Colletes cunicularius	m	4.17
Out	2018-04-16	2018	10	gelb	Lasioglossum calceatum	f	2.69
Out	2018-04-16	2018	10	gelb	Lasioglossum calceatum	f	2.7
Out	2018-04-16	2018	10	gelb	Lasioglossum calceatum	f	2.78
Out	2018-04-16	2018	10	gelb	Lasioglossum malachurum	f	2.42
Out	2018-04-16	2018	10	gelb	Osmia cornuta	m	4.73
Out	2018-04-16	2018	10	weiss	Andrena vaga	f	3.95
Out	2018-04-16	2018	11	blau	Lasioglossum calceatum	f	2.84
Out	2018-04-16	2018	11	weiss	Andrena flavipes	f	3.16
Out	2018-04-16	2018	11	weiss	Andrena vaga	m	3.33
Out	2018-04-16	2018	11	weiss	Colletes cunicularius	m	4.29
Out	2018-04-16	2018	11	weiss	Colletes cunicularius	m	4.04
Out	2018-04-16	2018	11	weiss	Colletes cunicularius	m	4.73
Out	2018-04-16	2018	11	weiss	Colletes cunicularius	m	3.83
Out	2018-04-16	2018	11	weiss	Colletes cunicularius	m	4.17
Out	2018-04-16	2018	11	weiss	Colletes cunicularius	m	4.49
Out	2018-04-16	2018	11	weiss	Colletes cunicularius	m	4.26
Out	2018-04-16	2018	11	weiss	Colletes cunicularius	m	3.91
Out	2018-04-16	2018	11	weiss	Colletes cunicularius	m	3.84
Out	2018-04-16	2018	11	weiss	Colletes cunicularius	m	4.11
Out	2018-04-16	2018	11	weiss	Colletes cunicularius	m	4.02
Out	2018-04-16	2018	11	weiss	Colletes cunicularius	m	4.41
Out	2018-04-16	2018	11	weiss	Colletes cunicularius	m	3.91
Out	2018-04-16	2018	11	weiss	Colletes cunicularius	m	4.23
Out	2018-04-16	2018	11	weiss	Colletes cunicularius	m	3.78
Out	2018-04-16	2018	11	weiss	Colletes cunicularius	m	4.26
Out	2018-04-16	2018	11	weiss	Colletes cunicularius	m	4.42
Out	2018-04-16	2018	11	weiss	Colletes cunicularius	m	3.82
Out	2018-04-16	2018	11	weiss	Colletes cunicularius	m	4.2
Out	2018-04-16	2018	11	weiss	Colletes cunicularius	m	4.27
Out	2018-04-16	2018	11	weiss	Colletes cunicularius	m	4.43
Out	2018-04-16	2018	11	weiss	Colletes cunicularius	m	3.9
Out	2018-04-16	2018	11	weiss	Colletes cunicularius	m	3.98
Out	2018-04-16	2018	11	weiss	Colletes cunicularius	m	3.69
Out	2018-04-16	2018	11	weiss	Colletes cunicularius	m	4.24
Out	2018-04-16	2018	11	weiss	Colletes cunicularius	m	4.57
Out	2018-04-16	2018	11	weiss	Colletes cunicularius	m	3.7
Out	2018-04-16	2018	11	weiss	Colletes cunicularius	m	3.93
Out	2018-04-16	2018	11	weiss	Colletes cunicularius	m	4.28
Out	2018-04-16	2018	11	weiss	Colletes cunicularius	m	4.4
Out	2018-04-16	2018	11	weiss	Colletes cunicularius	m	4.35
Out	2018-04-16	2018	11	weiss	Colletes cunicularius	m	3.95
Out	2018-04-16	2018	11	weiss	Colletes cunicularius	m	4.03
Out	2018-04-16	2018	11	weiss	Colletes cunicularius	m	4.24
Out	2018-04-16	2018	11	weiss	Colletes cunicularius	m	4.38
Out	2018-04-16	2018	11	weiss	Colletes cunicularius	m	4.46
Out	2018-04-16	2018	11	weiss	Colletes cunicularius	m	3.83
Out	2018-04-16	2018	11	weiss	Colletes cunicularius	m	3.55
Out	2018-04-16	2018	11	weiss	Colletes cunicularius	m	4.31
Out	2018-04-16	2018	11	weiss	Colletes cunicularius	m	4.06
Out	2018-04-16	2018	11	weiss	Colletes cunicularius	m	3.84
Out	2018-04-16	2018	11	weiss	Colletes cunicularius	m	4.17
Out	2018-04-16	2018	11	weiss	Colletes cunicularius	m	4
Out	2018-04-16	2018	11	weiss	Colletes cunicularius	m	3.83
Out	2018-04-16	2018	11	weiss	Colletes cunicularius	m	3.93
Out	2018-04-16	2018	11	weiss	Colletes cunicularius	m	4.17
Out	2018-04-16	2018	11	weiss	Colletes cunicularius	m	3.92
Out	2018-04-16	2018	11	weiss	Colletes cunicularius	m	4.21
Out	2019-04-08	2019	10	weiss	Colletes cunicularius	m	4.09
Out	2019-04-08	2019	10	weiss	Colletes cunicularius	m	4.19
Out	2019-04-08	2019	10	weiss	Colletes cunicularius	m	4.22
Out	2019-04-08	2019	10	gelb	Colletes cunicularius	m	3.57
Out	2019-04-08	2019	10	gelb	Colletes cunicularius	m	4.15
Out	2019-04-08	2019	11	weiss	Colletes cunicularius	m	4.46
Out	2019-04-08	2019	11	weiss	Colletes cunicularius	m	4.51
Out	2019-04-12	2019	10	weiss	Colletes cunicularius	m	4.1
Out	2019-04-12	2019	10	gelb	Colletes cunicularius	m	4.32
Out	2019-04-12	2019	11	blau	Colletes cunicularius	m	4.46
Out	2019-04-15	2019	10	gelb	Colletes cunicularius	m	4.54
Out	2019-04-18	2019	10	weiss	Colletes cunicularius	m	4.56
Out	2019-04-18	2019	10	gelb	Colletes cunicularius	m	4.15
Out	2016-06-03	2016	11	blau	Apis mellifera	w	3.98
Out	2016-06-03	2016	11	blau	Halictus scabiosae	f	4
Out	2016-06-03	2016	11	gelb	Apis mellifera	w	4.3
Out	2016-06-03	2016	11	gelb	Halictus scabiosae	f	3.6
Out	2016-06-03	2016	11	gelb	Halictus scabiosae	f	3.72
Out	2016-06-03	2016	11	gelb	Lasioglossum leucozonium	f	2.95
Out	2016-06-03	2016	11	weiss	Apis mellifera	w	4.03
Out	2016-06-03	2016	11	weiss	Halictus scabiosae	f	3.76
Out	2016-06-03	2016	11	weiss	Halictus simplex-Gruppe	f	3.14
Out	2016-06-03	2016	11	weiss	Lasioglossum calceatum	f	2.76
Out	2016-06-03	2016	11	weiss	Lasioglossum pauxillum	f	1.78
Out	2016-06-03	2016	12	blau	Apis mellifera	w	3.98
Out	2016-06-03	2016	12	blau	Apis mellifera	w	4.22
Out	2016-06-03	2016	12	blau	Apis mellifera	w	4.09
Out	2016-06-03	2016	12	blau	Apis mellifera	w	4.11
Out	2017-04-24	2017	11	gelb	Andrena bicolor	f	2.53
Out	2017-04-24	2017	11	gelb	Andrena minutula	f	1.94
Out	2019-05-03	2019	11	weiss	Halictus scabiosae	f	3.34
Out	2019-05-17	2019	10	gelb	Halictus scabiosae	f	3.49
Out	2019-05-22	2019	10	gelb	Halictus scabiosae	f	3.25
Out	2016-06-03	2016	12	blau	Halictus scabiosae	f	3.48
Out	2016-06-03	2016	12	blau	Lasioglossum malachurum	f	2.18
Out	2016-06-03	2016	12	gelb	Andrena humilis	f	3.28
Out	2016-06-03	2016	12	gelb	Apis mellifera	w	4.2
Out	2016-06-03	2016	12	weiss	Apis mellifera	w	4.28
Out	2016-06-03	2016	12	weiss	Halictus simplex-Gruppe	f	2.81
Out	2016-06-03	2016	12	weiss	Lasioglossum villosulum	f	1.9
Out	2016-06-07	2016	9	blau	Apis mellifera	w	4.38
Out	2016-06-07	2016	9	blau	Apis mellifera	w	3.93
Out	2016-06-07	2016	9	blau	Apis mellifera	w	4.06
Out	2016-06-07	2016	9	blau	Apis mellifera	w	3.98
Out	2016-06-07	2016	9	gelb	Andrena haemorrhoa	f	3.69
Out	2016-06-07	2016	9	gelb	Apis mellifera	w	4.04
Out	2016-06-07	2016	9	gelb	Lasioglossum calceatum	f	3.11
Out	2016-06-07	2016	9	gelb	Lasioglossum calceatum	f	2.55
Out	2016-06-07	2016	9	weiss	Apis mellifera	w	4.23
Out	2016-06-07	2016	10	gelb	Andrena humilis	f	3.12
Out	2016-06-07	2016	10	gelb	Andrena nigroolivacea	f	3.46
Out	2016-06-07	2016	10	gelb	Apis mellifera	w	3.89
Out	2016-06-07	2016	10	gelb	Apis mellifera	w	4.09
Out	2016-06-07	2016	10	gelb	Bombus pratonum	w	4.79
Out	2016-06-07	2016	10	gelb	Lasioglossum leucozonium	f	2.85
Out	2016-06-07	2016	10	weiss	Apis mellifera	w	4.15
Out	2016-06-07	2016	10	weiss	Apis mellifera	w	4.19
Out	2016-06-07	2016	10	weiss	Lasioglossum leucozonium	f	2.71
Out	2016-06-07	2016	11	gelb	Andrena humilis	f	3.22
Out	2016-06-07	2016	11	gelb	Andrena minutula	f	1.92
Out	2016-06-07	2016	11	gelb	Apis mellifera	w	4.12
Out	2016-06-07	2016	11	gelb	Halictus simplex-Gruppe	f	3.16
Out	2016-06-07	2016	11	gelb	Halictus simplex-Gruppe	f	2.97
Out	2016-06-07	2016	11	gelb	Halictus tumulorum	f	2.09
Out	2016-06-07	2016	11	gelb	Lasioglossum calceatum	f	2.57
Out	2016-06-07	2016	11	weiss	Apis mellifera	w	4.18
Out	2016-06-07	2016	11	weiss	Halictus simplex-Gruppe	f	3.11
Out	2016-06-07	2016	12	blau	Andrena haemorrhoa	f	3.44
Out	2016-06-07	2016	12	blau	Apis mellifera	w	4.28
Out	2016-06-07	2016	12	blau	Apis mellifera	w	4.07
Out	2016-06-07	2016	12	gelb	Andrena humilis	f	3.36
Out	2016-06-07	2016	12	gelb	Apis mellifera	w	4.02
Out	2017-04-24	2017	11	gelb	Andrena vaga	f	3.2
Out	2017-04-24	2017	11	gelb	Andrena vaga	f	3.97
Out	2017-04-24	2017	11	gelb	Halictus tumulorum	f	1.91
Out	2017-04-24	2017	11	gelb	Lasioglossum calceatum	f	2.73
Out	2017-04-24	2017	12	weiss	Bombus veteranus	f	6.66
Out	2018-04-16	2018	11	weiss	Colletes cunicularius	m	4.38
Out	2016-06-07	2016	12	gelb	Apis mellifera	w	4.1
Out	2016-06-07	2016	12	weiss	Apis mellifera	w	4.21
Out	2016-06-07	2016	12	weiss	Apis mellifera	w	4.26
Out	2016-06-10	2016	9	gelb	Halictus simplex-Gruppe	f	3
Out	2016-06-10	2016	9	gelb	Halictus simplex-Gruppe	f	2.94
Out	2017-04-28	2017	9	blau	Halictus tumulorum	f	1.93
Out	2017-04-28	2017	10	blau	Andrena minutula	f	1.91
Out	2017-05-01	2017	9	gelb	Apis mellifera	w	4.05
Out	2017-05-01	2017	9	gelb	Colletes cunicularius	f	4.88
Out	2017-05-01	2017	9	weiss	Colletes cunicularius	f	4.67
Out	2017-05-01	2017	10	weiss	Andrena vaga	f	4.09
Out	2017-05-01	2017	10	weiss	Apis mellifera	w	4.38
Out	2017-05-01	2017	10	weiss	Colletes cunicularius	f	4.82
Out	2018-04-16	2018	11	weiss	Colletes cunicularius	m	3.98
Out	2018-04-16	2018	11	weiss	Colletes cunicularius	m	4.07
Out	2018-04-16	2018	11	weiss	Colletes cunicularius	m	4.11
Out	2018-04-16	2018	11	weiss	Colletes cunicularius	m	4
Out	2018-04-16	2018	11	weiss	Colletes cunicularius	m	4.1
Out	2018-04-16	2018	11	weiss	Colletes cunicularius	m	4.32
Out	2019-05-17	2019	10	gelb	Halictus tumulorum	f	2.29
Out	2016-06-10	2016	10	blau	Halictus simplex-Gruppe	f	3.07
Out	2016-06-10	2016	10	gelb	Apis mellifera	w	4.2
Out	2016-06-10	2016	11	weiss	Apis mellifera	w	4.44
Out	2016-06-10	2016	11	weiss	Halictus simplex-Gruppe	f	2.89
Out	2016-06-10	2016	12	gelb	Bombus terrestris - Gruppe	w	6.1
Out	2016-06-10	2016	12	gelb	Halictus scabiosae	f	3.99
Out	2016-06-14	2016	9	blau	Apis mellifera	w	4.51
Out	2016-06-14	2016	9	gelb	Lasioglossum glabriusculum	f	1.53
Out	2016-06-14	2016	9	gelb	Lasioglossum malachurum	f	1.82
Out	2016-06-14	2016	9	gelb	Lasioglossum malachurum	f	2.13
Out	2016-06-14	2016	9	gelb	Lasioglossum pauxillum	f	1.72
Out	2016-06-14	2016	9	weiss	Apis mellifera	w	4.06
Out	2017-05-01	2017	11	gelb	Lasioglossum malachurum	f	2.42
Out	2017-05-01	2017	12	weiss	Apis mellifera	w	4.38
Out	2017-05-01	2017	12	weiss	Lasioglossum calceatum	f	2.73
Out	2017-05-05	2017	9	blau	Apis mellifera	w	4.22
Out	2017-05-05	2017	9	blau	Apis mellifera	w	3.69
Out	2017-05-05	2017	9	weiss	Andrena cineraria	f	4.04
Out	2017-05-05	2017	9	weiss	Andrena vaga	f	3.9
Out	2017-05-05	2017	9	weiss	Andrena vaga	f	4.03
Out	2018-04-16	2018	11	weiss	Colletes cunicularius	m	4.17
Out	2018-04-16	2018	11	weiss	Colletes cunicularius	m	4.59
Out	2018-04-16	2018	11	weiss	Colletes cunicularius	m	4.25
Out	2018-04-16	2018	11	weiss	Colletes cunicularius	m	4.16
Out	2018-04-16	2018	11	weiss	Colletes cunicularius	m	4.38
Out	2018-04-16	2018	11	weiss	Colletes cunicularius	m	3.96
Out	2018-04-16	2018	11	weiss	Colletes cunicularius	m	4.21
Out	2018-04-16	2018	11	weiss	Colletes cunicularius	m	4.44
Out	2018-04-16	2018	11	weiss	Colletes cunicularius	m	4.45
Out	2018-04-16	2018	11	weiss	Colletes cunicularius	m	4.37
Out	2018-04-16	2018	11	weiss	Colletes cunicularius	m	3.96
Out	2018-04-16	2018	11	weiss	Colletes cunicularius	m	4.23
Out	2018-04-16	2018	11	weiss	Colletes cunicularius	m	4.2
Out	2018-04-16	2018	11	weiss	Colletes cunicularius	m	4.17
Out	2018-04-16	2018	11	weiss	Colletes cunicularius	m	3.85
Out	2018-04-16	2018	11	weiss	Colletes cunicularius	m	3.99
Out	2018-04-16	2018	11	weiss	Colletes cunicularius	m	4.41
Out	2018-04-16	2018	11	weiss	Colletes cunicularius	m	3.9
Out	2018-04-16	2018	11	weiss	Colletes cunicularius	m	4.51
Out	2018-04-16	2018	11	weiss	Colletes cunicularius	m	3.84
Out	2018-04-16	2018	11	weiss	Colletes cunicularius	m	3.87
Out	2018-04-16	2018	11	weiss	Colletes cunicularius	m	4.3
Out	2018-04-16	2018	11	weiss	Colletes cunicularius	m	4.46
Out	2018-04-16	2018	11	weiss	Colletes cunicularius	m	4.18
Out	2018-04-16	2018	11	weiss	Colletes cunicularius	m	4.11
Out	2018-04-16	2018	11	weiss	Colletes cunicularius	m	3.98
Out	2018-04-16	2018	11	weiss	Colletes cunicularius	m	3.96
Out	2018-04-16	2018	11	weiss	Colletes cunicularius	m	4.21
Out	2018-04-16	2018	11	weiss	Colletes cunicularius	m	4.04
Out	2018-04-16	2018	11	weiss	Colletes cunicularius	m	4.12
Out	2018-04-16	2018	11	weiss	Colletes cunicularius	m	4.48
Out	2018-04-16	2018	11	weiss	Colletes cunicularius	m	4.49
Out	2018-04-16	2018	11	weiss	Colletes cunicularius	m	4.25
Out	2018-04-16	2018	11	weiss	Colletes cunicularius	m	3.75
Out	2018-04-16	2018	11	weiss	Colletes cunicularius	m	3.92
Out	2018-04-16	2018	11	weiss	Colletes cunicularius	m	3.84
Out	2018-04-16	2018	11	weiss	Colletes cunicularius	m	3.93
Out	2018-04-16	2018	11	weiss	Colletes cunicularius	m	4.17
Out	2018-04-16	2018	11	weiss	Colletes cunicularius	m	4.27
Out	2018-04-16	2018	11	weiss	Colletes cunicularius	m	3.91
Out	2018-04-16	2018	11	weiss	Colletes cunicularius	m	4.09
Out	2018-04-16	2018	11	weiss	Colletes cunicularius	m	4.25
Out	2018-04-16	2018	11	weiss	Colletes cunicularius	m	4.33
Out	2018-04-16	2018	11	weiss	Colletes cunicularius	m	4.11
Out	2018-04-16	2018	11	weiss	Colletes cunicularius	m	3.94
Out	2018-04-16	2018	11	weiss	Colletes cunicularius	m	4.03
Out	2018-04-16	2018	11	weiss	Colletes cunicularius	m	3.78
Out	2018-04-16	2018	11	weiss	Colletes cunicularius	m	4.14
Out	2018-04-16	2018	11	weiss	Colletes cunicularius	m	4.26
Out	2018-04-16	2018	11	weiss	Colletes cunicularius	m	4.14
Out	2018-04-16	2018	11	weiss	Colletes cunicularius	m	3.94
Out	2018-04-16	2018	11	weiss	Colletes cunicularius	m	4.26
Out	2018-04-16	2018	11	weiss	Lasioglossum calceatum	f	2.67
Out	2018-04-16	2018	11	weiss	Lasioglossum calceatum	f	2.71
Out	2018-04-16	2018	11	weiss	Lasioglossum calceatum	f	2.94
Out	2019-04-18	2019	9	weiss	Lasioglossum calceatum	f	2.76
Out	2019-04-18	2019	9	weiss	Lasioglossum calceatum	f	2.64
Out	2019-04-18	2019	9	weiss	Lasioglossum calceatum	f	2.68
Out	2019-04-18	2019	9	gelb	Lasioglossum calceatum	f	2.63
Out	2019-04-18	2019	10	gelb	Lasioglossum calceatum	f	2.6
Out	2019-04-18	2019	10	gelb	Lasioglossum calceatum	f	2.72
Out	2019-04-18	2019	11	weiss	Lasioglossum calceatum	f	2.88
Out	2019-04-18	2019	11	blau	Lasioglossum calceatum	f	2.97
Out	2019-04-18	2019	11	blau	Lasioglossum calceatum	f	2.64
Out	2019-04-18	2019	12	gelb	Lasioglossum calceatum	f	2.46
Out	2019-04-18	2019	12	blau	Lasioglossum calceatum	f	2.88
Out	2019-04-23	2019	9	weiss	Lasioglossum calceatum	f	2.85
Out	2019-04-23	2019	9	weiss	Lasioglossum calceatum	f	2.75
Out	2019-04-23	2019	9	weiss	Osmia bicornis	m	3.1
Out	2019-04-23	2019	9	weiss	Lasioglossum calceatum	f	2.66
Out	2019-04-23	2019	9	weiss	Lasioglossum malachurum	f	2.5
Out	2019-04-23	2019	9	weiss	Lasioglossum calceatum	f	2.55
Out	2019-04-23	2019	9	weiss	Lasioglossum calceatum	f	2.64
Out	2019-04-23	2019	9	weiss	Lasioglossum laticeps	f	2.13
Out	2019-04-23	2019	9	weiss	Lasioglossum calceatum	f	3.08
Out	2019-04-23	2019	9	gelb	Osmia cornuta	m	3.78
Out	2019-04-23	2019	9	gelb	Osmia cornuta	m	4.47
Out	2019-04-23	2019	9	gelb	Lasioglossum malachurum	f	2.16
Out	2019-04-23	2019	9	gelb	Lasioglossum malachurum	f	2.31
Out	2019-04-23	2019	9	gelb	Lasioglossum malachurum	f	2.53
Out	2019-04-23	2019	9	gelb	Lasioglossum malachurum	f	2.51
Out	2019-04-23	2019	9	gelb	Lasioglossum calceatum	f	2.42
Out	2019-04-23	2019	9	gelb	Lasioglossum calceatum	f	2.44
Out	2019-04-23	2019	9	gelb	Lasioglossum calceatum	f	2.49
Out	2019-04-23	2019	9	gelb	Lasioglossum calceatum	f	2.69
Out	2019-04-23	2019	9	blau	Osmia cornuta	m	4.39
Out	2019-04-23	2019	9	blau	Osmia cornuta	m	4.22
Out	2019-04-23	2019	9	blau	Osmia cornuta	m	4.94
Out	2019-05-03	2019	12	gelb	Lasioglossum calceatum	f	2.83
Out	2019-05-10	2019	9	weiss	Lasioglossum calceatum	f	2.54
Out	2019-05-10	2019	12	gelb	Lasioglossum calceatum	f	2.75
Out	2019-05-10	2019	12	gelb	Lasioglossum calceatum	f	2.57
Out	2019-05-17	2019	10	weiss	Lasioglossum calceatum	f	2.64
Out	2019-05-17	2019	12	gelb	Lasioglossum calceatum	f	2.65
Out	2019-05-17	2019	12	gelb	Lasioglossum calceatum	f	2.73
Out	2019-05-22	2019	10	blau	Lasioglossum calceatum	f	2.52
Out	2019-05-22	2019	12	blau	Lasioglossum calceatum	f	2.82
Out	2019-05-22	2019	12	blau	Lasioglossum calceatum	f	2.74
Out	2017-05-05	2017	9	weiss	Colletes cunicularius	f	5.11
Out	2016-06-14	2016	9	weiss	Apis mellifera	w	4.04
Out	2016-06-14	2016	9	weiss	Halictus simplex-Gruppe	f	3.03
Out	2016-06-14	2016	10	weiss	Lasioglossum leucozonium	f	2.44
Out	2016-06-14	2016	10	weiss	Lasioglossum malachurum	f	1.95
Out	2017-05-05	2017	9	weiss	Colletes cunicularius	f	4.26
Out	2017-05-05	2017	10	gelb	Apis mellifera	w	4.08
Out	2017-05-05	2017	10	gelb	Apis mellifera	w	4.24
Out	2017-05-05	2017	11	gelb	Apis mellifera	w	3.73
Out	2017-05-05	2017	11	weiss	Colletes cunicularius	f	4.82
Out	2017-05-05	2017	11	weiss	Colletes cunicularius	f	4.53
Out	2017-05-05	2017	12	gelb	Lasioglossum calceatum	f	2.54
Out	2019-05-17	2019	11	gelb	Lasioglossum glabriusculum	f	1.55
Out	2019-05-22	2019	9	gelb	Lasioglossum glabriusculum	f	1.51
Out	2019-05-22	2019	10	gelb	Lasioglossum glabriusculum	f	1.37
Out	2019-05-22	2019	10	gelb	Lasioglossum glabriusculum	f	1.36
Out	2019-05-22	2019	10	gelb	Lasioglossum glabriusculum	f	1.36
Out	2019-05-22	2019	10	gelb	Lasioglossum glabriusculum	f	1.46
Out	2019-05-22	2019	10	gelb	Lasioglossum glabriusculum	f	1.57
Out	2019-05-22	2019	10	gelb	Lasioglossum glabriusculum	f	1.56
Out	2019-05-22	2019	10	gelb	Lasioglossum glabriusculum	f	1.39
Out	2019-05-22	2019	10	gelb	Lasioglossum glabriusculum	f	1.44
Out	2017-05-08	2017	9	gelb	Lasioglossum laticeps	f	2.05
Out	2017-05-08	2017	9	weiss	Colletes cunicularius	f	4.96
Out	2018-04-16	2018	11	weiss	Lasioglossum calceatum	f	2.5
Out	2018-04-16	2018	11	weiss	Lasioglossum calceatum	f	2.69
Out	2018-04-16	2018	11	weiss	Lasioglossum malachurum	f	2.38
Out	2018-04-16	2018	11	weiss	Lasioglossum malachurum	f	2.52
Out	2018-04-16	2018	11	weiss	Osmia cornuta	m	3.95
Out	2018-04-16	2018	11	weiss	Osmia cornuta	m	4.1
Out	2018-04-16	2018	12	blau	Colletes cunicularius	m	4.33
Out	2019-04-15	2019	10	gelb	Lasioglossum laticeps	f	2.11
Out	2019-04-23	2019	9	blau	Osmia cornuta	m	4.26
Out	2019-04-23	2019	9	blau	Osmia cornuta	m	4.42
Out	2019-04-23	2019	9	blau	Lasioglossum malachurum	f	2.53
Out	2019-04-23	2019	9	blau	Lasioglossum malachurum	f	2.4
Out	2019-05-03	2019	11	gelb	Lasioglossum laticeps	f	2.08
Out	2019-05-03	2019	12	blau	Lasioglossum laticeps	f	2.18
Out	2019-05-13	2019	10	gelb	Lasioglossum laticeps	f	2.21
Out	2019-05-22	2019	11	weiss	Lasioglossum laticeps	f	2.09
Out	2016-06-14	2016	11	blau	Apis mellifera	w	4.03
Out	2016-06-14	2016	11	gelb	Apis mellifera	w	3.96
Out	2016-06-14	2016	11	gelb	Halictus scabiosae	f	3.86
Out	2016-06-14	2016	12	blau	Halictus simplex-Gruppe	f	3.05
Out	2016-06-14	2016	12	gelb	Lasioglossum leucozonium	f	2.92
Out	2016-06-14	2016	12	weiss	Halictus simplex-Gruppe	f	3.04
Out	2016-06-17	2016	9	blau	Lasioglossum malachurum	f	2.42
Out	2016-06-17	2016	9	gelb	Halictus tumulorum	f	2.01
Out	2016-06-17	2016	9	gelb	Lasioglossum malachurum	f	2.3
Out	2016-06-17	2016	11	blau	Apis mellifera	w	4.12
Out	2016-06-17	2016	11	blau	Lasioglossum malachurum	f	2.51
Out	2016-06-17	2016	11	gelb	Apis mellifera	w	4.02
Out	2016-06-17	2016	11	gelb	Lasioglossum malachurum	f	2.52
Out	2016-06-17	2016	11	weiss	Lasioglossum pauxillum	f	1.8
Out	2016-06-17	2016	11	weiss	Lasioglossum pauxillum	f	1.84
Out	2016-06-17	2016	12	gelb	Andrena humilis	f	3.31
Out	2016-06-20	2016	9	blau	Apis mellifera	w	3.94
Out	2016-06-20	2016	10	blau	Apis mellifera	w	4
Out	2016-06-20	2016	10	gelb	Apis mellifera	w	4.1
Out	2016-06-20	2016	10	weiss	Apis mellifera	w	3.84
Out	2016-06-20	2016	11	blau	Apis mellifera	w	4.45
Out	2016-06-20	2016	11	gelb	Andrena humilis	f	3.4
Out	2016-06-20	2016	11	gelb	Apis mellifera	w	4.23
Out	2016-06-20	2016	11	gelb	Lasioglossum calceatum	f	2.38
Out	2016-06-20	2016	11	gelb	Lasioglossum leucozonium	f	2.76
Out	2016-06-24	2016	9	blau	Apis mellifera	w	4.01
Out	2016-06-24	2016	9	blau	Bombus terrestris - Gruppe	w	5.49
Out	2016-06-24	2016	9	gelb	Lasioglossum calceatum	f	2.6
Out	2016-06-24	2016	9	gelb	Lasioglossum glabriusculum	f	1.4
Out	2016-06-24	2016	9	gelb	Lasioglossum malachurum	f	2.25
Out	2016-06-24	2016	9	gelb	Lasioglossum malachurum	f	2.11
Out	2016-06-24	2016	9	gelb	Lasioglossum malachurum	f	2.1
Out	2016-06-24	2016	9	gelb	Lasioglossum malachurum	f	2.18
Out	2016-06-24	2016	9	gelb	Lasioglossum malachurum	f	2.2
Out	2016-06-24	2016	9	gelb	Lasioglossum malachurum	f	2.09
Out	2016-06-24	2016	9	gelb	Lasioglossum malachurum	f	2.02
Out	2016-06-24	2016	9	weiss	Bombus sylvarum	w	4.69
Out	2016-06-24	2016	10	blau	Lasioglossum calceatum	f	2.62
Out	2016-06-24	2016	10	gelb	Apis mellifera	w	4.18
Out	2016-06-24	2016	10	weiss	Megachile willughbiella	f	3.66
Out	2016-06-24	2016	11	blau	Halictus tumulorum	f	1.99
Out	2016-06-24	2016	11	gelb	Apis mellifera	w	4.22
Out	2016-06-24	2016	11	gelb	Halictus scabiosae	f	3.86
Out	2016-06-24	2016	11	gelb	Lasioglossum leucozonium	f	2.66
Out	2017-05-08	2017	10	gelb	Lasioglossum malachurum	f	2.33
Out	2017-05-08	2017	11	gelb	Lasioglossum glabriusculum	f	1.4
Out	2017-05-08	2017	11	gelb	Lasioglossum malachurum	f	2.36
Out	2017-05-08	2017	12	gelb	Lasioglossum pauxillum	f	1.59
Out	2017-05-12	2017	9	blau	Halictus simplex-Gruppe	f	3.08
Out	2017-05-12	2017	9	gelb	Apis mellifera	w	4.31
Out	2017-05-12	2017	9	weiss	Andrena vaga	f	4.01
Out	2017-05-12	2017	9	weiss	Apis mellifera	w	4.03
Out	2017-05-12	2017	9	weiss	Colletes cunicularius	f	4.35
Out	2017-05-12	2017	9	weiss	Halictus scabiosae	f	3.17
Out	2017-05-12	2017	9	weiss	Lasioglossum malachurum	f	2.35
Out	2017-05-12	2017	10	blau	Halictus tumulorum	f	2.12
Out	2017-05-12	2017	10	gelb	Lasioglossum morio	f	1.59
Out	2017-05-12	2017	10	weiss	Andrena vaga	f	3.67
Out	2017-05-12	2017	11	blau	Halictus simplex-Gruppe	f	2.69
Out	2017-05-12	2017	11	gelb	Apis mellifera	w	4.12
Out	2017-05-12	2017	11	gelb	Halictus scabiosae	f	3.46
Out	2017-05-12	2017	11	gelb	Lasioglossum pauxillum	f	1.8
Out	2017-05-12	2017	12	gelb	Lasioglossum calceatum	f	2.97
Out	2017-05-15	2017	9	blau	Apis mellifera	w	4.16
Out	2017-05-15	2017	9	blau	Apis mellifera	w	4.3
Out	2017-05-15	2017	9	gelb	Apis mellifera	w	4.19
Out	2017-05-15	2017	9	gelb	Halictus tumulorum	f	2.03
Out	2017-05-15	2017	9	gelb	Halictus tumulorum	f	2.14
Out	2017-05-15	2017	9	gelb	Lasioglossum glabriusculum	f	1.38
Out	2017-05-15	2017	9	weiss	Apis mellifera	w	4.26
Out	2017-05-15	2017	9	weiss	Apis mellifera	w	4.43
Out	2017-05-15	2017	9	weiss	Halictus simplex-Gruppe	f	2.67
Out	2017-05-15	2017	9	weiss	Lasioglossum glabriusculum	f	1.61
Out	2017-05-15	2017	9	weiss	Lasioglossum glabriusculum	f	1.28
Out	2018-04-16	2018	12	blau	Lasioglossum malachurum	f	2.57
Out	2018-04-16	2018	12	blau	Lasioglossum malachurum	f	2.47
Out	2018-04-16	2018	12	gelb	Lasioglossum calceatum	f	2.64
Out	2018-04-16	2018	12	gelb	Lasioglossum calceatum	f	2.82
Out	2018-04-16	2018	12	gelb	Lasioglossum calceatum	f	2.94
Out	2018-04-16	2018	12	gelb	Lasioglossum malachurum	f	2.32
Out	2018-04-16	2018	12	gelb	Lasioglossum malachurum	f	2.44
Out	2018-04-16	2018	12	gelb	Osmia cornuta	m	4.6
Out	2018-04-16	2018	12	weiss	Lasioglossum malachurum	f	2.45
Out	2018-04-16	2018	12	weiss	Lasioglossum malachurum	f	2.43
Out	2018-04-16	2018	12	weiss	Lasioglossum malachurum	f	2.54
Out	2018-04-20	2018	9	blau	Lasioglossum malachurum	f	2.51
Out	2018-04-20	2018	9	gelb	Lasioglossum calceatum	f	2.7
Out	2018-04-20	2018	9	weiss	Lasioglossum malachurum	f	2.51
Out	2018-04-20	2018	9	weiss	Osmia cornuta	f	5.24
Out	2018-04-20	2018	9	weiss	Osmia cornuta	m	4.21
Out	2018-04-20	2018	10	blau	Osmia cornuta	f	4.72
Out	2018-04-20	2018	10	gelb	Andrena nitida	m	3.12
Out	2018-04-20	2018	10	gelb	Colletes cunicularius	m	4.27
Out	2018-04-20	2018	10	gelb	Colletes cunicularius	m	4.16
Out	2018-04-20	2018	10	gelb	Colletes cunicularius	m	4.14
Out	2018-04-20	2018	10	gelb	Colletes cunicularius	m	3.79
Out	2018-04-20	2018	10	gelb	Colletes cunicularius	m	4.02
Out	2018-04-20	2018	10	gelb	Colletes cunicularius	m	4.12
Out	2018-04-20	2018	10	gelb	Colletes cunicularius	m	3.65
Out	2018-04-20	2018	10	gelb	Lasioglossum calceatum	f	2.76
Out	2018-04-20	2018	10	gelb	Lasioglossum calceatum	f	2.7
Out	2018-04-20	2018	10	gelb	Lasioglossum calceatum	f	2.23
Out	2018-04-20	2018	10	gelb	Lasioglossum calceatum	f	2.71
Out	2018-04-20	2018	10	gelb	Lasioglossum calceatum	f	2.85
Out	2018-04-20	2018	10	gelb	Lasioglossum calceatum	f	2.84
Out	2018-04-20	2018	10	gelb	Lasioglossum laticeps	f	1.99
Out	2018-04-20	2018	10	gelb	Lasioglossum malachurum	f	2.36
Out	2018-04-20	2018	10	gelb	Osmia cornuta	m	3.91
Out	2018-04-20	2018	11	gelb	Osmia cornuta	m	4.11
Out	2018-04-20	2018	11	weiss	Colletes cunicularius	m	3.97
Out	2018-04-20	2018	11	weiss	Lasioglossum calceatum	f	2.62
Out	2018-04-20	2018	11	weiss	Lasioglossum calceatum	f	2.77
Out	2018-04-20	2018	11	weiss	Lasioglossum calceatum	f	2.64
Out	2018-04-20	2018	11	weiss	Lasioglossum laticeps	f	2.25
Out	2018-04-20	2018	11	weiss	Lasioglossum malachurum	f	2.54
Out	2018-04-20	2018	11	weiss	Lasioglossum malachurum	f	2.74
Out	2018-04-20	2018	11	weiss	Osmia cornuta	m	3.98
Out	2018-04-20	2018	11	weiss	Osmia cornuta	m	4.29
Out	2018-04-20	2018	11	weiss	Osmia cornuta	m	3.31
Out	2018-04-20	2018	12	gelb	Colletes cunicularius	f	4.9
Out	2018-04-20	2018	12	gelb	Lasioglossum calceatum	f	2.94
Out	2018-04-20	2018	12	gelb	Lasioglossum calceatum	f	2.66
Out	2018-04-20	2018	12	gelb	Osmia bicornis	m	3.55
Out	2018-04-20	2018	12	gelb	Osmia cornuta	m	3.87
Out	2018-04-20	2018	12	weiss	Lasioglossum calceatum	f	2.47
Out	2018-04-20	2018	12	weiss	Lasioglossum calceatum	f	2.93
Out	2018-04-23	2018	9	weiss	Lasioglossum malachurum	f	2.48
Out	2018-04-23	2018	11	blau	Colletes cunicularius	f	4.86
Out	2018-04-27	2018	9	gelb	Halictus tumulorum	f	1.96
Out	2018-04-27	2018	9	gelb	Lasioglossum calceatum	f	2.81
Out	2018-04-27	2018	9	gelb	Lasioglossum laticeps	f	2.28
Out	2018-04-27	2018	9	weiss	Andrena haemorrhoa	f	3.39
Out	2018-04-27	2018	9	weiss	Osmia cornuta	m	3.57
Out	2018-04-27	2018	10	blau	Lasioglossum laticeps	f	2.2
Out	2018-04-27	2018	10	gelb	Andrena flavipes	f	3.4
Out	2018-04-27	2018	10	weiss	Colletes cunicularius	f	4.63
Out	2018-04-27	2018	11	gelb	Lasioglossum calceatum	f	2.39
Out	2019-04-08	2019	9	gelb	Lasioglossum malachurum	f	2.68
Out	2019-04-08	2019	9	blau	Lasioglossum malachurum	f	2.39
Out	2019-04-08	2019	10	gelb	Lasioglossum malachurum	f	2
Out	2019-04-08	2019	11	gelb	Lasioglossum malachurum	f	2.48
Out	2019-04-08	2019	11	blau	Lasioglossum malachurum	f	2.47
Out	2019-04-08	2019	12	weiss	Lasioglossum malachurum	f	2.6
Out	2019-04-12	2019	11	weiss	Lasioglossum malachurum	f	2.52
Out	2019-04-18	2019	9	weiss	Lasioglossum malachurum	f	2.39
Out	2019-04-18	2019	9	weiss	Lasioglossum malachurum	f	2.43
Out	2019-04-18	2019	9	weiss	Lasioglossum malachurum	f	2.54
Out	2019-04-18	2019	9	weiss	Lasioglossum malachurum	f	2.28
Out	2019-04-18	2019	9	weiss	Lasioglossum malachurum	f	2.55
Out	2019-04-18	2019	9	weiss	Lasioglossum malachurum	f	2.66
Out	2019-04-18	2019	9	weiss	Lasioglossum malachurum	f	2.32
Out	2019-04-18	2019	9	weiss	Lasioglossum malachurum	f	2.44
Out	2019-04-18	2019	9	weiss	Lasioglossum malachurum	f	2.57
Out	2019-04-18	2019	9	weiss	Lasioglossum malachurum	f	2.35
Out	2019-04-18	2019	9	gelb	Lasioglossum malachurum	f	2.58
Out	2019-04-18	2019	9	gelb	Lasioglossum malachurum	f	2.52
Out	2019-04-18	2019	9	gelb	Lasioglossum malachurum	f	2.45
Out	2019-04-18	2019	9	gelb	Lasioglossum malachurum	f	2.39
Out	2019-04-18	2019	9	gelb	Lasioglossum malachurum	f	2.48
Out	2019-04-18	2019	9	gelb	Lasioglossum malachurum	f	2.62
Out	2019-04-18	2019	9	blau	Lasioglossum malachurum	f	2.45
Out	2019-04-18	2019	9	blau	Lasioglossum malachurum	f	2.56
Out	2019-04-18	2019	9	blau	Lasioglossum malachurum	f	2.25
Out	2019-04-18	2019	9	blau	Lasioglossum malachurum	f	2.46
Out	2019-04-18	2019	9	blau	Lasioglossum malachurum	f	2.44
Out	2019-04-18	2019	9	blau	Lasioglossum malachurum	f	2.46
Out	2019-04-18	2019	9	blau	Lasioglossum malachurum	f	2.44
Out	2019-04-18	2019	10	weiss	Lasioglossum malachurum	f	2.56
Out	2019-04-18	2019	10	gelb	Lasioglossum malachurum	f	2.43
Out	2019-04-18	2019	10	gelb	Lasioglossum malachurum	f	2.52
Out	2019-04-18	2019	10	gelb	Lasioglossum malachurum	f	2.37
Out	2019-04-18	2019	10	gelb	Lasioglossum malachurum	f	2.56
Out	2019-04-18	2019	10	gelb	Lasioglossum malachurum	f	2.43
Out	2019-04-18	2019	10	gelb	Lasioglossum malachurum	f	2.6
Out	2019-04-18	2019	10	gelb	Lasioglossum malachurum	f	2.49
Out	2019-04-18	2019	10	gelb	Lasioglossum malachurum	f	2.46
Out	2019-04-18	2019	10	gelb	Lasioglossum malachurum	f	2.77
Out	2019-04-18	2019	10	gelb	Lasioglossum malachurum	f	2.48
Out	2019-04-18	2019	10	gelb	Lasioglossum malachurum	f	2.67
Out	2019-04-18	2019	10	gelb	Lasioglossum malachurum	f	2.43
Out	2019-04-18	2019	10	gelb	Lasioglossum malachurum	f	2.61
Out	2019-04-18	2019	10	gelb	Lasioglossum malachurum	f	2.3
Out	2019-04-18	2019	10	blau	Lasioglossum malachurum	f	2.62
Out	2019-04-18	2019	11	weiss	Lasioglossum malachurum	f	2.73
Out	2019-04-18	2019	11	weiss	Lasioglossum malachurum	f	2.61
Out	2019-04-18	2019	11	weiss	Lasioglossum malachurum	f	2.55
Out	2019-04-18	2019	11	weiss	Lasioglossum malachurum	f	2.47
Out	2019-04-18	2019	11	weiss	Lasioglossum malachurum	f	2.64
Out	2019-04-18	2019	11	gelb	Lasioglossum malachurum	f	2.61
Out	2019-04-18	2019	11	gelb	Lasioglossum malachurum	f	2.65
Out	2019-04-18	2019	11	gelb	Lasioglossum malachurum	f	2.67
Out	2019-04-18	2019	11	gelb	Lasioglossum malachurum	f	2.6
Out	2019-04-18	2019	11	gelb	Lasioglossum malachurum	f	2.46
Out	2019-04-18	2019	11	gelb	Lasioglossum malachurum	f	2.57
Out	2019-04-18	2019	11	gelb	Lasioglossum malachurum	f	2.56
Out	2019-04-18	2019	11	gelb	Lasioglossum malachurum	f	2.58
Out	2019-04-18	2019	11	blau	Lasioglossum malachurum	f	2.55
Out	2019-04-18	2019	11	blau	Lasioglossum malachurum	f	2.4
Out	2019-04-18	2019	12	weiss	Lasioglossum malachurum	f	2.61
Out	2019-04-18	2019	12	weiss	Lasioglossum malachurum	f	2.5
Out	2019-04-18	2019	12	gelb	Lasioglossum malachurum	f	2.51
Out	2019-04-18	2019	12	gelb	Lasioglossum malachurum	f	2.41
Out	2019-04-18	2019	12	gelb	Lasioglossum malachurum	f	2.43
Out	2019-04-18	2019	12	gelb	Lasioglossum malachurum	f	2.52
Out	2019-04-18	2019	12	gelb	Lasioglossum malachurum	f	2.34
Out	2019-04-18	2019	12	gelb	Lasioglossum malachurum	f	2.56
Out	2019-04-18	2019	12	gelb	Lasioglossum malachurum	f	2.32
Out	2019-04-18	2019	12	gelb	Lasioglossum malachurum	f	2.41
Out	2019-04-18	2019	12	gelb	Lasioglossum malachurum	f	2.41
Out	2019-04-18	2019	12	gelb	Lasioglossum malachurum	f	2.38
Out	2019-04-18	2019	12	gelb	Lasioglossum malachurum	f	2.46
Out	2019-04-18	2019	12	gelb	Lasioglossum malachurum	f	2.59
Out	2019-04-18	2019	12	gelb	Lasioglossum malachurum	f	2.39
Out	2019-04-18	2019	12	gelb	Lasioglossum malachurum	f	2.42
Out	2019-04-18	2019	12	gelb	Lasioglossum malachurum	f	2.39
Out	2019-04-18	2019	12	gelb	Lasioglossum malachurum	f	2.6
Out	2019-04-18	2019	12	blau	Lasioglossum malachurum	f	2.6
Out	2019-04-18	2019	12	blau	Lasioglossum malachurum	f	2.33
Out	2019-04-18	2019	12	blau	Lasioglossum malachurum	f	2.48
Out	2019-04-18	2019	12	blau	Lasioglossum malachurum	f	2.53
Out	2019-04-18	2019	12	blau	Lasioglossum malachurum	f	2.51
Out	2019-04-18	2019	12	blau	Lasioglossum malachurum	f	2.55
Out	2019-04-18	2019	12	blau	Lasioglossum malachurum	f	2.46
Out	2019-04-18	2019	12	blau	Lasioglossum malachurum	f	2.43
Out	2019-04-18	2019	12	blau	Lasioglossum malachurum	f	2.6
Out	2019-04-18	2019	12	blau	Lasioglossum malachurum	f	2.61
Out	2019-04-18	2019	12	blau	Lasioglossum malachurum	f	2.59
Out	2019-04-18	2019	12	blau	Lasioglossum malachurum	f	2.3
Out	2019-04-18	2019	12	blau	Lasioglossum malachurum	f	2.41
Out	2019-04-18	2019	12	blau	Lasioglossum malachurum	f	2.38
Out	2019-04-18	2019	12	blau	Lasioglossum malachurum	f	2.45
Out	2019-04-23	2019	9	blau	Lasioglossum malachurum	f	2.55
Out	2019-04-23	2019	9	blau	Lasioglossum malachurum	f	2.46
Out	2019-04-23	2019	9	blau	Lasioglossum calceatum	f	2.62
Out	2019-04-23	2019	9	blau	Lasioglossum calceatum	f	2.77
Out	2019-04-23	2019	9	blau	Lasioglossum malachurum	f	2.44
Out	2019-04-23	2019	9	blau	Lasioglossum malachurum	f	2.39
Out	2019-04-23	2019	9	blau	Lasioglossum malachurum	f	2.33
Out	2019-04-23	2019	9	blau	Lasioglossum malachurum	f	2.48
Out	2019-04-23	2019	9	blau	Lasioglossum malachurum	f	2.6
Out	2019-04-23	2019	10	weiss	Osmia cornuta	m	4.39
Out	2019-04-23	2019	10	gelb	Lasioglossum malachurum	f	2.28
Out	2019-04-23	2019	10	gelb	Lasioglossum malachurum	f	2.59
Out	2019-04-23	2019	10	gelb	Lasioglossum malachurum	f	2.43
Out	2019-04-23	2019	10	gelb	Lasioglossum malachurum	f	2.54
Out	2019-04-23	2019	10	gelb	Lasioglossum pauxillum	f	1.9
Out	2019-04-23	2019	10	gelb	Lasioglossum malachurum	f	2.46
Out	2019-04-23	2019	10	gelb	Lasioglossum calceatum	f	2.59
Out	2019-04-23	2019	10	gelb	Lasioglossum malachurum	f	2.53
Out	2019-04-23	2019	11	gelb	Lasioglossum calceatum	f	2.86
Out	2019-04-23	2019	11	blau	Lasioglossum calceatum	f	2.56
Out	2019-04-23	2019	12	weiss	Lasioglossum malachurum	f	2.56
Out	2019-04-23	2019	12	gelb	Lasioglossum malachurum	f	2.54
Out	2019-04-23	2019	12	gelb	Lasioglossum calceatum	f	2.59
Out	2019-04-23	2019	12	gelb	Lasioglossum malachurum	f	2.56
Out	2019-04-23	2019	12	gelb	Lasioglossum malachurum	f	2.36
Out	2019-04-23	2019	12	gelb	Lasioglossum malachurum	f	2.56
Out	2019-04-23	2019	12	gelb	Lasioglossum malachurum	f	2.27
Out	2019-04-23	2019	12	gelb	Lasioglossum malachurum	f	2.57
Out	2019-04-23	2019	12	gelb	Lasioglossum malachurum	f	2.66
Out	2019-04-23	2019	12	gelb	Lasioglossum malachurum	f	2.65
Out	2019-04-23	2019	12	gelb	Lasioglossum malachurum	f	2.4
Out	2019-04-23	2019	12	gelb	Lasioglossum malachurum	f	2.56
Out	2019-04-23	2019	12	gelb	Osmia bicornis	m	3.48
Out	2019-04-23	2019	12	gelb	Lasioglossum calceatum	f	2.85
Out	2019-04-23	2019	12	gelb	Lasioglossum malachurum	f	2.47
Out	2019-04-23	2019	12	gelb	Lasioglossum malachurum	f	2.57
Out	2019-04-23	2019	12	gelb	Lasioglossum malachurum	f	2.39
Out	2019-04-23	2019	12	gelb	Lasioglossum malachurum	f	2.5
Out	2019-04-23	2019	12	gelb	Lasioglossum malachurum	f	2.64
Out	2019-04-23	2019	12	gelb	Lasioglossum malachurum	f	2.47
Out	2019-04-23	2019	12	gelb	Lasioglossum malachurum	f	2.54
Out	2019-04-23	2019	12	gelb	Lasioglossum pauxillum	f	1.73
Out	2019-04-23	2019	12	gelb	Lasioglossum malachurum	f	2.21
Out	2019-04-23	2019	12	gelb	Lasioglossum malachurum	f	2.46
Out	2019-04-23	2019	12	gelb	Lasioglossum malachurum	f	2.54
Out	2019-04-23	2019	12	gelb	Lasioglossum malachurum	f	2.5
Out	2019-04-23	2019	12	gelb	Andrena bicolor	f	2.85
Out	2019-04-23	2019	12	gelb	Andrena bicolor	f	2.94
Out	2019-04-23	2019	12	gelb	Andrena haemorrhoa	f	3.93
Out	2019-04-23	2019	12	gelb	Osmia cornuta	m	4.2
Out	2019-04-23	2019	12	blau	Lasioglossum malachurum	f	2.37
Out	2019-04-23	2019	12	blau	Lasioglossum malachurum	f	2.36
Out	2019-04-23	2019	12	blau	Lasioglossum malachurum	f	2.4
Out	2019-04-23	2019	12	blau	Lasioglossum malachurum	f	2.49
Out	2019-04-23	2019	12	blau	Lasioglossum malachurum	f	2.64
Out	2019-04-23	2019	12	blau	Lasioglossum malachurum	f	2.51
Out	2019-04-23	2019	12	blau	Lasioglossum malachurum	f	2.38
Out	2019-05-03	2019	12	gelb	Lasioglossum malachurum	f	2.52
Out	2019-05-03	2019	12	gelb	Lasioglossum malachurum	f	2.64
Out	2019-05-10	2019	12	gelb	Lasioglossum malachurum	f	2.39
Out	2019-05-22	2019	10	gelb	Lasioglossum malachurum	f	2.51
Out	2017-05-15	2017	9	weiss	Lasioglossum glabriusculum	f	1.2
Out	2019-05-03	2019	11	gelb	Lasioglossum morio	f	1.69
Out	2019-05-17	2019	9	blau	Lasioglossum morio	f	1.53
Out	2019-05-22	2019	10	gelb	Lasioglossum morio	f	1.57
Out	2019-05-22	2019	10	gelb	Lasioglossum morio	f	1.7
Out	2016-06-24	2016	11	gelb	Lasioglossum malachurum	f	2.08
Out	2016-06-24	2016	11	gelb	Lasioglossum malachurum	f	1.89
Out	2016-06-24	2016	11	weiss	Apis mellifera	w	4
Out	2016-06-24	2016	11	weiss	Halictus simplex-Gruppe	f	2.85
Out	2016-06-24	2016	12	gelb	Lasioglossum leucozonium	f	2.66
Out	2016-06-24	2016	12	gelb	Lasioglossum malachurum	f	1.92
Out	2017-05-15	2017	9	weiss	Lasioglossum glabriusculum	f	1.23
Out	2017-05-15	2017	9	weiss	Lasioglossum glabriusculum	f	1.28
Out	2017-05-15	2017	9	weiss	Lasioglossum zonulum	f	2.73
Out	2017-05-15	2017	9	weiss	Osmia bicornis	f	4.11
Out	2017-05-15	2017	10	gelb	Andrena mitis	f	3.21
Out	2018-04-27	2018	11	weiss	Halictus tumulorum	f	2.16
Out	2018-04-27	2018	11	weiss	Osmia bicornis	m	3.32
Out	2019-04-23	2019	12	blau	Lasioglossum malachurum	f	2.47
Out	2019-04-23	2019	12	blau	Lasioglossum malachurum	f	2.45
Out	2019-04-23	2019	12	blau	Lasioglossum malachurum	f	2.47
Out	2019-04-26	2019	9	weiss	Osmia cornuta	m	4.17
Out	2019-05-17	2019	12	gelb	Lasioglossum pauxillum	f	1.75
Out	2019-05-17	2019	12	gelb	Lasioglossum pauxillum	f	1.71
Out	2019-05-17	2019	12	gelb	Lasioglossum pauxillum	f	1.65
Out	2019-05-22	2019	11	gelb	Lasioglossum pauxillum	f	1.66
Out	2019-05-22	2019	11	gelb	Lasioglossum pauxillum	f	1.73
[truncated: 1,391 more rows]

## Sheet: Flower observations
							number of flowers visited by				number of arthropods on flowers									number of trees with presence of
Date	Tree row	Type	Time	Tree number	Observer	Open flowers	honey bees	bumble bees	other wild bees	hover flies	small flies	large flies	bee flies	lady beetles	other beetles	wasps	spiders	lacewings	crane flies	ants	pollen beetles	aphids
2016-06-07	A	outside	09:50:00	351	1	21														yes	yes
2016-06-07	A	outside	09:50:00	355	1	48	1				1									yes		yes
2016-06-07	A	outside	09:50:00	357	1	35	2				1
2016-06-07	A	outside	09:50:00	359	1	86					1									yes		yes
2016-06-07	A	outside	14:20:00	351	1
2016-06-07	A	outside	14:20:00	355	1
2016-06-07	A	outside	14:20:00	357	1
2016-06-07	A	outside	14:20:00	359	1				3
2016-06-07	B	outside	10:10:00	368	1	30			1		2							2		yes	yes
2016-06-07	B	outside	10:10:00	364	1	6														yes
2016-06-07	B	outside	10:10:00	362	1	46	2									1
2016-06-07	B	outside	10:10:00	365	1	65					1
2016-06-07	B	outside	14:30:00	368	1						2
2016-06-07	B	outside	14:30:00	364	1
2016-06-07	B	outside	14:30:00	362	1
2016-06-07	B	outside	14:30:00	365	1				1		1									yes
2016-06-07	C	outside	10:25:00	378	1	16														yes
2016-06-07	C	outside	10:25:00	376	1	34														yes
2016-06-07	C	outside	10:25:00	374	1	40	2								2					yes
2016-06-07	C	outside	10:25:00	372	1	42				1										yes
2016-06-07	C	outside	14:45:00	378	1
2016-06-07	C	outside	14:45:00	376	1
2016-06-07	C	outside	14:45:00	374	1				2
2016-06-07	C	outside	14:45:00	372	1						1
2016-06-07	D	outside	10:40:00	388	1	130				7										yes	yes
2016-06-07	D	outside	10:40:00	385	1	58				1										yes
2016-06-07	D	outside	10:40:00	383	1	50				6
2016-06-07	D	outside	10:40:00	381	1	93				10
2016-06-07	D	outside	14:55:00	388	1							1
2016-06-07	D	outside	14:55:00	385	1
2016-06-07	D	outside	14:55:00	383	1							1								yes	yes
2016-06-07	D	outside	14:55:00	381	1																yes
2016-06-07	E	outside	11:00:00	397	1	49
2016-06-07	E	outside	11:00:00	395	1	22
2016-06-07	E	outside	11:00:00	392	1	41				1				1
2016-06-07	E	outside	11:00:00	391	1	22	2
2016-06-07	E	outside	15:07:00	397	1				2
2016-06-07	E	outside	15:07:00	395	1							1		1
2016-06-07	E	outside	15:07:00	392	1															yes
2016-06-07	E	outside	15:07:00	391	1															yes
2016-06-07	1	inside	11:15:00	47	1						1
2016-06-07	1	inside	11:15:00	53	1															yes
2016-06-07	1	inside	11:15:00	65	1
2016-06-07	1	inside	11:15:00	77	1															yes
2016-06-07	1	inside	15:15:00	47	1	67														yes
2016-06-07	1	inside	15:15:00	53	1	60
2016-06-07	1	inside	15:15:00	65	1	84															yes
2016-06-07	1	inside	15:15:00	77	1	70
2016-06-07	2	inside	11:30:00	134	1
2016-06-07	2	inside	11:30:00	122	1
2016-06-07	2	inside	11:30:00	110	1						1						1			yes
2016-06-07	2	inside	11:30:00	98	1															yes
2016-06-07	2	inside	15:30:00	134	1	28
2016-06-07	2	inside	15:30:00	122	1	56											1
2016-06-07	2	inside	15:30:00	110	1	110
2016-06-07	2	inside	15:30:00	98	1	36
2016-06-07	3	inside	11:40:00	137	1
2016-06-07	3	inside	11:40:00	149	1															yes
2016-06-07	3	inside	11:40:00	161	1
2016-06-07	3	inside	11:40:00	173	1
2016-06-07	3	inside	15:44:00	137	1	130
2016-06-07	3	inside	15:44:00	149	1	53					1
2016-06-07	3	inside	15:44:00	161	1	21
2016-06-07	3	inside	15:44:00	173	1	119
2016-06-07	4	inside	11:50:00	218	1
2016-06-07	4	inside	11:50:00	206	1
2016-06-07	4	inside	11:50:00	194	1															yes
2016-06-07	4	inside	11:50:00	182	1												1			yes
2016-06-07	4	inside	15:57:00	218	1	49
2016-06-07	4	inside	15:57:00	206	1	94
2016-06-07	4	inside	15:57:00	194	1	66
2016-06-07	4	inside	15:57:00	182	1	123
2016-06-07	5	inside	12:00:00	233	1															yes
2016-06-07	5	inside	12:00:00	245	1															yes
2016-06-07	5	inside	12:00:00	263	1
2016-06-07	5	inside	12:00:00	269	1															yes
2016-06-07	5	inside	16:10:00	233	1	29														yes
2016-06-07	5	inside	16:10:00	245	1	62
2016-06-07	5	inside	16:10:00	263	1	37															yes
2016-06-07	5	inside	16:10:00	269	1	60														yes
2016-06-10	A	outside	10:34:00	350	1	43	1				1
2016-06-10	A	outside	10:34:00	352	1	14
2016-06-10	A	outside	10:34:00	351	2	25				1										yes
2016-06-10	A	outside	10:34:00	354	2	34														yes	yes
2016-06-10	A	outside	16:17:00	350	1						1									yes
2016-06-10	A	outside	16:17:00	352	1
2016-06-10	A	outside	15:25:00	351	2															yes
2016-06-10	A	outside	15:25:00	354	2									2						yes
2016-06-10	B	outside	10:50:00	360	1	23	1													yes
2016-06-10	B	outside	10:50:00	362	1	26						1
2016-06-10	B	outside	10:50:00	365	1	21														yes
2016-06-10	B	outside	10:50:00	368	1	16						1								yes	yes
2016-06-10	B	outside	16:20:00	360	1		6													yes
2016-06-10	B	outside	16:20:00	362	1		2													yes
2016-06-10	B	outside	16:20:00	365	1															yes
2016-06-10	B	outside	16:20:00	368	1		2
2016-06-10	C	outside	11:00:00	370	1	15						1									yes
2016-06-10	C	outside	11:00:00	373	1	44				6
2016-06-10	C	outside	11:00:00	376	1	25					1	1		1							yes
2016-06-10	C	outside	11:00:00	378	1	10								1
2016-06-10	C	outside	16:30:00	370	1															yes
2016-06-10	C	outside	16:30:00	373	1					3										yes
2016-06-10	C	outside	16:30:00	376	1						1					1				yes	yes
2016-06-10	C	outside	16:30:00	378	1															yes	yes
2016-06-10	D	outside	10:50:00	380	2	57					1							1		yes	yes
2016-06-10	D	outside	10:50:00	382	2	30
2016-06-10	D	outside	10:50:00	386	2	61															yes
2016-06-10	D	outside	10:50:00	388	2	55				4										yes
2016-06-10	D	outside	15:35:00	380	2						1									yes	yes
2016-06-10	D	outside	15:35:00	382	2					1											yes
2016-06-10	D	outside	15:35:00	386	2						1									yes
2016-06-10	D	outside	15:35:00	388	2
2016-06-10	E	outside	11:00:00	394	2	30			5
2016-06-10	E	outside	11:00:00	395	2	23														yes	yes
2016-06-10	E	outside	11:00:00	397	2	40					2
2016-06-10	E	outside	11:00:00	399	2	21					1
2016-06-10	E	outside	15:45:00	394	2																yes
2016-06-10	E	outside	15:45:00	395	2																yes
2016-06-10	E	outside	15:45:00	397	2										1
2016-06-10	E	outside	15:45:00	399	2				1			1								yes
2016-06-10	1	inside	11:25:00	53	2	40
2016-06-10	1	inside	11:25:00	65	2	55															yes
2016-06-10	1	inside	11:25:00	71	2	48															yes
2016-06-10	1	inside	11:25:00	83	2	22
2016-06-10	1	inside	15:55:00	53	2															yes
2016-06-10	1	inside	15:55:00	65	2
2016-06-10	1	inside	15:55:00	71	2																yes
2016-06-10	1	inside	15:55:00	83	2
2016-06-10	2	inside	11:35:00	134	2	10
2016-06-10	2	inside	11:35:00	122	2	28
2016-06-10	2	inside	11:35:00	110	2	51															yes
2016-06-10	2	inside	11:35:00	98	2	23														yes
2016-06-10	2	inside	16:05:00	134	2
2016-06-10	2	inside	16:05:00	122	2
2016-06-10	2	inside	16:05:00	110	2						2										yes
2016-06-10	2	inside	16:05:00	98	2															yes
2016-06-10	3	inside	11:50:00	137	1	79														yes
2016-06-10	3	inside	11:50:00	161	1	20
2016-06-10	3	inside	11:50:00	167	1	10
2016-06-10	3	inside	11:50:00	173	1	17
2016-06-10	3	inside	16:35:00	137	2															yes
2016-06-10	3	inside	16:35:00	161	2
2016-06-10	3	inside	16:35:00	167	2
2016-06-10	3	inside	16:35:00	173	2
2016-06-10	4	inside	11:35:00	206	1	27															yes
2016-06-10	4	inside	11:35:00	200	1	55
2016-06-10	4	inside	11:35:00	194	1	66
2016-06-10	4	inside	11:35:00	188	1	40														yes
2016-06-10	4	inside	16:26:00	206	2
2016-06-10	4	inside	16:26:00	200	2
2016-06-10	4	inside	16:26:00	194	2						1									yes
2016-06-10	4	inside	16:26:00	188	2															yes
2016-06-10	5	inside	11:25:00	233	1	22														yes
2016-06-10	5	inside	11:25:00	245	1	35					1									yes
2016-06-10	5	inside	11:25:00	251	1	65														yes
2016-06-10	5	inside	11:25:00	263	1	21
2016-06-10	5	inside	16:17:00	233	2															yes
2016-06-10	5	inside	16:17:00	245	2
2016-06-10	5	inside	16:17:00	251	2						1									yes
2016-06-10	5	inside	16:17:00	263	2															yes
2017-04-13	A	outside	10:15:00	358	2	20
2017-04-13	A	outside	10:15:00	357	2	41
2017-04-13	A	outside	10:15:00	355	2	28
2017-04-13	A	outside	10:15:00	353	2	28							3
2017-04-13	A	outside	14:05:00	358	2		8	1
2017-04-13	A	outside	14:05:00	357	2		7
2017-04-13	A	outside	14:05:00	355	2		6		2
2017-04-13	A	outside	14:05:00	353	2		14		3		1
2017-04-13	B	outside	10:15:00	367	1	18		3
2017-04-13	B	outside	10:15:00	365	1	17			1
2017-04-13	B	outside	10:15:00	363	1	26				1
2017-04-13	B	outside	10:15:00	361	1	27														yes
2017-04-13	B	outside	14:15:00	367	1				1
2017-04-13	B	outside	14:15:00	365	1		2
2017-04-13	B	outside	14:15:00	363	1															yes
2017-04-13	B	outside	14:15:00	361	1
2017-04-13	C	outside	10:30:00	378	1	11				1
2017-04-13	C	outside	10:30:00	376	1	7		2	2			1
2017-04-13	C	outside	10:30:00	374	1	11
2017-04-13	C	outside	10:30:00	372	1	11
2017-04-13	C	outside	14:30:00	378	1
2017-04-13	C	outside	14:30:00	376	1
2017-04-13	C	outside	14:30:00	374	1
2017-04-13	C	outside	14:30:00	372	1				1		1
2017-04-13	D	outside	10:30:00	389	2	7
2017-04-13	D	outside	10:30:00	388	2	4
2017-04-13	D	outside	10:30:00	385	2	9
2017-04-13	D	outside	10:30:00	380	2	3
2017-04-13	D	outside	14:30:00	389	2
2017-04-13	D	outside	14:30:00	388	2
2017-04-13	D	outside	14:30:00	385	2
2017-04-13	D	outside	14:30:00	380	2
2017-04-13	E	outside	10:40:00	397	2	70		10												yes	yes
2017-04-13	E	outside	10:40:00	396	2	42			1	1										yes	yes
2017-04-13	E	outside	10:40:00	394	2	70			2											yes	yes
2017-04-13	E	outside	10:40:00	392	2	50	11		1
2017-04-13	E	outside	14:35:00	397	2		15						1
2017-04-13	E	outside	14:35:00	396	2							1	2							yes
2017-04-13	E	outside	14:35:00	394	2		6		1											yes
2017-04-13	E	outside	14:35:00	392	2															yes
2017-04-13	1	inside	11:00:00	47	2	26
2017-04-13	1	inside	11:00:00	53	2	10
2017-04-13	1	inside	11:00:00	65	2	8
2017-04-13	1	inside	11:00:00	77	2	8
2017-04-13	1	inside	14:50:00	47	2
2017-04-13	1	inside	14:50:00	53	2
2017-04-13	1	inside	14:50:00	65	2
2017-04-13	1	inside	14:50:00	77	2
2017-04-13	2	inside	11:10:00	98	2	9
2017-04-13	2	inside	11:10:00	104	2	14
2017-04-13	2	inside	11:10:00	116	2	14
2017-04-13	2	inside	11:10:00	134	2	4
2017-04-13	2	inside	15:00:00	98	2
2017-04-13	2	inside	15:00:00	104	2
2017-04-13	2	inside	15:00:00	116	2						1
2017-04-13	2	inside	15:00:00	134	2
2017-04-13	3	inside	11:25:00	137	2	17														yes
2017-04-13	3	inside	11:25:00	149	2	9
2017-04-13	3	inside	11:25:00	161	2	6
2017-04-13	3	inside	11:25:00	173	2	8
2017-04-13	3	inside	15:10:00	137	2															yes
2017-04-13	3	inside	15:10:00	149	2
2017-04-13	3	inside	15:10:00	161	2															yes
2017-04-13	3	inside	15:10:00	173	2
2017-04-13	4	inside	11:15:00	218	1	20
2017-04-13	4	inside	11:15:00	206	1	15											1
2017-04-13	4	inside	11:15:00	194	1	14
2017-04-13	4	inside	11:15:00	188	1	12
2017-04-13	4	inside	15:00:00	218	1						1
2017-04-13	4	inside	15:00:00	206	1
2017-04-13	4	inside	15:00:00	194	1
2017-04-13	4	inside	15:00:00	188	1
2017-04-13	5	inside	11:00:00	233	1	5
2017-04-13	5	inside	11:00:00	245	1	6
2017-04-13	5	inside	11:00:00	257	1	35
2017-04-13	5	inside	11:00:00	263	1	12											1
2017-04-13	5	inside	14:45:00	233	1
2017-04-13	5	inside	14:45:00	245	1
2017-04-13	5	inside	14:45:00	257	1															yes
2017-04-13	5	inside	14:45:00	263	1
2017-04-24	A	outside	13:00:00	358	1	65					3
2017-04-24	A	outside	13:00:00	356	1	100														yes	yes
2017-04-24	A	outside	13:00:00	354	1	70					6
2017-04-24	A	outside	13:00:00	352	1	80					2
2017-04-24	A	outside	16:00:00	358	1				2		3
2017-04-24	A	outside	16:00:00	356	1		2
2017-04-24	A	outside	16:00:00	354	1						6
2017-04-24	A	outside	16:00:00	352	1		1				2
2017-04-24	B	outside	13:15:00	367	1	150					2
2017-04-24	B	outside	13:15:00	364	1	100			1	1	3
2017-04-24	B	outside	13:15:00	362	1	45					3										yes
2017-04-24	B	outside	13:15:00	360	1	50			1		3
2017-04-24	B	outside	16:15:00	367	1		1		4		4
2017-04-24	B	outside	16:15:00	364	1						5									yes
2017-04-24	B	outside	16:15:00	362	1		1		1		3
2017-04-24	B	outside	16:15:00	360	1				1		3									yes
2017-04-24	C	outside	13:35:00	378	1	100			1		3	2
2017-04-24	C	outside	13:35:00	376	1	40			1		2									yes
2017-04-24	C	outside	13:35:00	373	1	60					2
2017-04-24	C	outside	13:35:00	371	1	50						1								yes
2017-04-24	C	outside	16:25:00	378	1						2										yes
2017-04-24	C	outside	16:25:00	376	1										1
2017-04-24	C	outside	16:25:00	373	1						2
2017-04-24	C	outside	16:25:00	371	1						1
2017-04-24	D	outside	14:00:00	389	1	60					1
2017-04-24	D	outside	14:00:00	388	1	60			4
2017-04-24	D	outside	14:00:00	385	1	50			1		1
2017-04-24	D	outside	14:00:00	380	1	60					2
2017-04-24	D	outside	16:40:00	389	1						2
2017-04-24	D	outside	16:40:00	388	1
2017-04-24	D	outside	16:40:00	385	1						1
2017-04-24	D	outside	16:40:00	380	1
2017-04-24	E	outside	14:15:00	398	1	80	5		1		2
2017-04-24	E	outside	14:15:00	396	1	70	4
2017-04-24	E	outside	14:15:00	393	1	120	11
2017-04-24	E	outside	14:15:00	391	1		3		1	1
2017-04-24	E	outside	16:50:00	398	1					3	2
2017-04-24	E	outside	16:50:00	396	1						1									yes
2017-04-24	E	outside	16:50:00	393	1					3	3
2017-04-24	E	outside	16:50:00	391	1		3				2
2017-04-24	1	inside	14:30:00	47	1	50
2017-04-24	1	inside	14:30:00	53	1	50
2017-04-24	1	inside	14:30:00	65	1	35
2017-04-24	1	inside	14:30:00	83	1	30									1
2017-04-24	1	inside	17:00:00	47	1															yes
2017-04-24	1	inside	17:00:00	53	1
2017-04-24	1	inside	17:00:00	65	1															yes	yes
2017-04-24	1	inside	17:00:00	83	1
2017-04-24	2	inside	14:40:00	128	1	25
2017-04-24	2	inside	14:40:00	116	1	40
2017-04-24	2	inside	14:40:00	104	1	15														yes
2017-04-24	2	inside	14:40:00	98	1	30
2017-04-24	2	inside	17:10:00	128	1
2017-04-24	2	inside	17:10:00	116	1
2017-04-24	2	inside	17:10:00	104	1															yes
2017-04-24	2	inside	17:10:00	98	1															yes
2017-04-24	3	inside	14:50:00	137	1	40					2
2017-04-24	3	inside	14:50:00	143	1	25
2017-04-24	3	inside	14:50:00	155	1	25
2017-04-24	3	inside	14:50:00	173	1	40					1
2017-04-24	3	inside	17:20:00	137	1
2017-04-24	3	inside	17:20:00	143	1						1
2017-04-24	3	inside	17:20:00	155	1												1
2017-04-24	3	inside	17:20:00	173	1
2017-04-24	4	inside	15:00:00	218	1	30
2017-04-24	4	inside	15:00:00	212	1	35														yes
2017-04-24	4	inside	15:00:00	200	1	50
2017-04-24	4	inside	15:00:00	188	1	40					1
2017-04-24	4	inside	17:30:00	218	1
2017-04-24	4	inside	17:30:00	212	1															yes
2017-04-24	4	inside	17:30:00	200	1
2017-04-24	4	inside	17:30:00	188	1															yes
2017-04-24	5	inside	15:10:00	233	1	15
2017-04-24	5	inside	15:10:00	239	1	35														yes
2017-04-24	5	inside	15:10:00	251	1	45
2017-04-24	5	inside	15:10:00	263	1	20					1									yes
2017-04-24	5	inside	17:40:00	233	1
2017-04-24	5	inside	17:40:00	239	1							1								yes
2017-04-24	5	inside	17:40:00	251	1
2017-04-24	5	inside	17:40:00	263	1
2018-04-23	A	outside	11:00:00	358	2															yes		yes
2018-04-23	A	outside	11:00:00	356	2
2018-04-23	A	outside	11:00:00	355	2
2018-04-23	A	outside	11:00:00	353	2		6
2018-04-23	A	outside	15:30:00	358	2	70														yes		yes
2018-04-23	A	outside	15:30:00	356	2	75
2018-04-23	A	outside	15:30:00	355	2	50
2018-04-23	A	outside	15:30:00	353	2	100							1
2018-04-23	B	outside	11:20:00	368	1	50														yes
2018-04-23	B	outside	11:20:00	366	1	20			4											yes
2018-04-23	B	outside	11:20:00	364	1	25			3											yes
2018-04-23	B	outside	11:20:00	360	1	30											1			yes
2018-04-23	B	outside	15:45:00	368	1	75
2018-04-23	B	outside	15:45:00	366	1	135					1
2018-04-23	B	outside	15:45:00	364	1	150
2018-04-23	B	outside	15:45:00	360	1	40
2018-04-23	C	outside	11:10:00	378	1	25														yes
2018-04-23	C	outside	11:10:00	375	1	25						1
2018-04-23	C	outside	11:10:00	372	1	25
2018-04-23	C	outside	11:10:00	370	1	20			6
2018-04-23	C	outside	15:35:00	378	1	60	3	5
2018-04-23	C	outside	15:35:00	375	1	50
2018-04-23	C	outside	15:35:00	372	1	40		2	7
2018-04-23	C	outside	15:35:00	370	1	35
2018-04-23	D	outside	11:15:00	386	2															yes		yes
2018-04-23	D	outside	11:15:00	385	2															yes
2018-04-23	D	outside	11:15:00	382	2					1										yes
2018-04-23	D	outside	11:15:00	380	2															yes
2018-04-23	D	outside	15:45:00	386	2	11														yes		yes
2018-04-23	D	outside	15:45:00	385	2	10														yes
2018-04-23	D	outside	15:45:00	382	2	8														yes
2018-04-23	D	outside	15:45:00	380	2	30				1										yes
2018-04-23	E	outside	11:30:00	399	2															yes
2018-04-23	E	outside	11:30:00	398	2				7											yes
2018-04-23	E	outside	11:30:00	396	2															yes
2018-04-23	E	outside	11:30:00	392	2								1
2018-04-23	E	outside	15:55:00	399	2	150														yes
2018-04-23	E	outside	15:55:00	398	2	150														yes
2018-04-23	E	outside	15:55:00	396	2	100		2	2											yes
2018-04-23	E	outside	15:55:00	392	2	70
2018-04-23	1	inside	11:40:00	47	2
2018-04-23	1	inside	11:40:00	53	2
2018-04-23	1	inside	11:40:00	65	2
2018-04-23	1	inside	11:40:00	83	2
2018-04-23	1	inside	16:05:00	47	2	32
2018-04-23	1	inside	16:05:00	53	2	38
2018-04-23	1	inside	16:05:00	65	2	65
2018-04-23	1	inside	16:05:00	83	2	78
2018-04-23	2	inside	11:50:00	134	2
2018-04-23	2	inside	11:50:00	122	2
2018-04-23	2	inside	11:50:00	116	2
2018-04-23	2	inside	11:50:00	104	2
2018-04-23	2	inside	16:15:00	134	2	26
2018-04-23	2	inside	16:15:00	122	2	33
2018-04-23	2	inside	16:15:00	116	2	78
2018-04-23	2	inside	16:15:00	104	2	69
2018-04-23	3	inside	12:00:00	137	1	45
2018-04-23	3	inside	12:00:00	149	1	35
2018-04-23	3	inside	12:00:00	173	1
2018-04-23	3	inside	12:00:00	167	1
2018-04-23	3	inside	16:25:00	137	1	70
2018-04-23	3	inside	16:25:00	149	1	50
2018-04-23	3	inside	16:25:00	173	1	50
2018-04-23	3	inside	16:25:00	167	1	32
2018-04-23	4	inside	11:50:00	218	1	45
2018-04-23	4	inside	11:50:00	206	1	30
2018-04-23	4	inside	11:50:00	200	1	45
2018-04-23	4	inside	11:50:00	188	1	20
2018-04-23	4	inside	16:15:00	218	1	75					1
2018-04-23	4	inside	16:15:00	206	1	45
2018-04-23	4	inside	16:15:00	200	1	70
2018-04-23	4	inside	16:15:00	188	1	35
2018-04-23	5	inside	11:40:00	233	1	30
2018-04-23	5	inside	11:40:00	245	1	40
2018-04-23	5	inside	11:40:00	257	1	55					1
2018-04-23	5	inside	11:40:00	269	1	35
2018-04-23	5	inside	16:05:00	233	1	40
2018-04-23	5	inside	16:05:00	245	1	60
2018-04-23	5	inside	16:05:00	257	1	80					3
2018-04-23	5	inside	16:05:00	269	1	55
2018-04-25	A	outside	11:05:00	357	2	200	2													yes
2018-04-25	A	outside	11:05:00	354	2	150														yes
2018-04-25	A	outside	11:05:00	353	2	200	4
2018-04-25	A	outside	11:05:00	352	2	150		3
2018-04-25	A	outside	15:45:00	357	2															yes
2018-04-25	A	outside	15:45:00	354	2						3									yes
2018-04-25	A	outside	15:45:00	353	2		5													yes
2018-04-25	A	outside	15:45:00	352	2				4											yes
2018-04-25	B	outside	11:20:00	368	2	200	1													yes
2018-04-25	B	outside	11:20:00	366	2	140
2018-04-25	B	outside	11:20:00	364	2	200														yes
2018-04-25	B	outside	11:20:00	361	2	150					1									yes
2018-04-25	B	outside	15:55:00	368	2						5									yes
2018-04-25	B	outside	15:55:00	366	2		1				2
2018-04-25	B	outside	15:55:00	364	2						2									yes
2018-04-25	B	outside	15:55:00	361	2		3						1							yes	yes
2018-04-25	C	outside	11:30:00	370	2	130			1		1
2018-04-25	C	outside	11:30:00	372	2	200					1									yes
2018-04-25	C	outside	11:30:00	376	2	130
2018-04-25	C	outside	11:30:00	378	2	200	8		11											yes
2018-04-25	C	outside	16:05:00	370	2						1
2018-04-25	C	outside	16:05:00	372	2
2018-04-25	C	outside	16:05:00	376	2				2
2018-04-25	C	outside	16:05:00	378	2		4		6
2018-04-25	D	outside	11:20:00	388	1	30
2018-04-25	D	outside	11:20:00	386	1	45														yes
2018-04-25	D	outside	11:20:00	382	1	55
2018-04-25	D	outside	11:20:00	380	1	120														yes
2018-04-25	D	outside	16:00:00	388	1
2018-04-25	D	outside	16:00:00	386	1															yes
2018-04-25	D	outside	16:00:00	382	1
2018-04-25	D	outside	16:00:00	380	1
2018-04-25	E	outside	11:10:00	391	1	150								1					1
2018-04-25	E	outside	11:10:00	393	1	150	8
2018-04-25	E	outside	11:10:00	397	1	150	6
2018-04-25	E	outside	11:10:00	399	1	250														yes
2018-04-25	E	outside	15:45:00	391	1		9						1
2018-04-25	E	outside	15:45:00	393	1		2				1								2
2018-04-25	E	outside	15:45:00	397	1		1													yes
2018-04-25	E	outside	15:45:00	399	1						1								1	yes
2018-04-25	1	inside	11:45:00	53	1	80															yes
2018-04-25	1	inside	11:45:00	65	1	120
2018-04-25	1	inside	11:45:00	77	1	100					1
2018-04-25	1	inside	11:45:00	89	1	150
2018-04-25	1	inside	16:15:00	53	1
2018-04-25	1	inside	16:15:00	65	1
2018-04-25	1	inside	16:15:00	77	1						1
2018-04-25	1	inside	16:15:00	89	1
2018-04-25	2	inside	11:55:00	128	1	100
2018-04-25	2	inside	11:55:00	116	1	120
2018-04-25	2	inside	11:55:00	104	1	100
2018-04-25	2	inside	11:55:00	92	1	120
2018-04-25	2	inside	16:30:00	128	1
2018-04-25	2	inside	16:30:00	116	1
2018-04-25	2	inside	16:30:00	104	1
2018-04-25	2	inside	16:30:00	92	1
2018-04-25	3	inside	12:00:00	143	1	150					1
2018-04-25	3	inside	12:00:00	149	1	100
2018-04-25	3	inside	12:00:00	167	1	90					1
2018-04-25	3	inside	12:00:00	173	1	80					1
2018-04-25	3	inside	16:40:00	143	1						1
2018-04-25	3	inside	16:40:00	149	1
2018-04-25	3	inside	16:40:00	167	1						1
2018-04-25	3	inside	16:40:00	173	1						1										yes
2018-04-25	4	inside	11:55:00	224	2	40
2018-04-25	4	inside	11:55:00	218	2	120
2018-04-25	4	inside	11:55:00	206	2	110
2018-04-25	4	inside	11:55:00	194	2	80
2018-04-25	4	inside	16:30:00	224	2
2018-04-25	4	inside	16:30:00	218	2																yes
2018-04-25	4	inside	16:30:00	206	2
2018-04-25	4	inside	16:30:00	194	2
2018-04-25	5	inside	11:45:00	227	2	110					1
2018-04-25	5	inside	11:45:00	233	2	100
2018-04-25	5	inside	11:45:00	245	2	130
2018-04-25	5	inside	11:45:00	257	2	160															yes
2018-04-25	5	inside	16:20:00	227	2
2018-04-25	5	inside	16:20:00	233	2						1
2018-04-25	5	inside	16:20:00	245	2
2018-04-25	5	inside	16:20:00	257	2																yes
2019-04-24	A	outside	10:45:00	357	2	60	10
2019-04-24	A	outside	10:45:00	356	2	70	1	2												yes
2019-04-24	A	outside	10:45:00	354	2	90		13
2019-04-24	A	outside	10:45:00	352	2	30		2
2019-04-24	A	outside	15:15:00	357	2		2		13
2019-04-24	A	outside	15:15:00	356	2		2		4
2019-04-24	A	outside	15:15:00	354	2		3		6
2019-04-24	A	outside	15:15:00	352	2		6		2		1
2019-04-24	B	outside	10:45:00	361	1	23			1		2									yes
2019-04-24	B	outside	10:45:00	364	1	30			11											yes
2019-04-24	B	outside	10:45:00	365	1	33	3		4											yes
2019-04-24	B	outside	10:45:00	368	1	36			5		1
2019-04-24	B	outside	15:20:00	361	1
2019-04-24	B	outside	15:20:00	364	1
2019-04-24	B	outside	15:20:00	365	1
2019-04-24	B	outside	15:20:00	368	1
2019-04-24	C	outside	11:00:00	370/1	1	21			1
2019-04-24	C	outside	11:00:00	373/2	1	20
2019-04-24	C	outside	11:00:00	375/6	1	6			1
2019-04-24	C	outside	11:00:00	378/9	1	24
2019-04-24	C	outside	15:30:00	370/1	1
2019-04-24	C	outside	15:30:00	373/2	1
2019-04-24	C	outside	15:30:00	375/6	1
2019-04-24	C	outside	15:30:00	378/9	1
2019-04-24	D	outside	10:55:00	389	2	55														yes
2019-04-24	D	outside	10:55:00	388	2	50
2019-04-24	D	outside	10:55:00	384	2	20		6													yes
2019-04-24	D	outside	10:55:00	382	2	55
2019-04-24	D	outside	15:30:00	389	2		3		6											yes
2019-04-24	D	outside	15:30:00	388	2				7
2019-04-24	D	outside	15:30:00	384	2				4		1
2019-04-24	D	outside	15:30:00	382	2				4											yes
2019-04-24	E	outside	11:08:00	390	2	45	2
2019-04-24	E	outside	11:08:00	391	2	70														yes	yes
2019-04-24	E	outside	11:08:00	393	2	40		3	1
2019-04-24	E	outside	11:08:00	394/5	2	30
2019-04-24	E	outside	15:40:00	390	2
2019-04-24	E	outside	15:40:00	391	2		7
2019-04-24	E	outside	15:40:00	393	2		4
2019-04-24	E	outside	15:40:00	394/5	2		2
2019-04-24	1	inside	11:15:00	47	2	140														yes
2019-04-24	1	inside	11:15:00	53	2	200														yes
2019-04-24	1	inside	11:15:00	65	2	160
2019-04-24	1	inside	11:15:00	77	2	150
2019-04-24	1	inside	15:45:00	47	2															yes
2019-04-24	1	inside	15:45:00	53	2															yes
2019-04-24	1	inside	15:45:00	65	2						1
2019-04-24	1	inside	15:45:00	77	2																yes
2019-04-24	2	inside	11:30:00	134	2	150														yes
2019-04-24	2	inside	11:30:00	128	2	160			1
2019-04-24	2	inside	11:30:00	122	2	120
2019-04-24	2	inside	11:30:00	104	2	200					1
2019-04-24	2	inside	15:55:00	134	2
2019-04-24	2	inside	15:55:00	128	2
2019-04-24	2	inside	15:55:00	122	2
2019-04-24	2	inside	15:55:00	104	2
2019-04-24	3	inside	11:40:00	143	2	160			2
2019-04-24	3	inside	11:40:00	161	2	140
2019-04-24	3	inside	11:40:00	167	2	180
2019-04-24	3	inside	11:40:00	173	2	160														yes
2019-04-24	3	inside	16:05:00	143	2
2019-04-24	3	inside	16:05:00	161	2
2019-04-24	3	inside	16:05:00	167	2
2019-04-24	3	inside	16:05:00	173	2
2019-04-24	4	inside	11:30:00	218	1	130
2019-04-24	4	inside	11:30:00	206	1	110					1
2019-04-24	4	inside	11:30:00	194	1	130					1
2019-04-24	4	inside	11:30:00	188	1	110					1
2019-04-24	4	inside	15:55:00	218	1
2019-04-24	4	inside	15:55:00	206	1						1
2019-04-24	4	inside	15:55:00	194	1
2019-04-24	4	inside	15:55:00	188	1						1
2019-04-24	5	inside	11:20:00	233	1	140			19
2019-04-24	5	inside	11:20:00	239	1	130														yes
2019-04-24	5	inside	11:20:00	251	1	170					1						1			yes
2019-04-24	5	inside	11:20:00	263	1	110					1									yes
2019-04-24	5	inside	15:45:00	233	1
2019-04-24	5	inside	15:45:00	239	1						1
2019-04-24	5	inside	15:45:00	251	1						1
2019-04-24	5	inside	15:45:00	263	1
2019-04-25	A	outside	11:10:00	357	1	60	14						1
2019-04-25	A	outside	11:10:00	355	1	120	12
2019-04-25	A	outside	11:10:00	353	1	100	7
2019-04-25	A	outside	11:10:00	352	1	40	7						2
2019-04-25	A	outside	15:15:00	357	1		2
2019-04-25	A	outside	15:15:00	355	1		4		4
2019-04-25	A	outside	15:15:00	353	1		5		7
2019-04-25	A	outside	15:15:00	352	1		5
2019-04-25	B	outside	11:15:00	360/1	2	60														yes
2019-04-25	B	outside	11:15:00	364	2	50			6											yes
2019-04-25	B	outside	11:15:00	365	2	60				1										yes
2019-04-25	B	outside	11:15:00	368	2	50														yes
2019-04-25	B	outside	15:15:00	360/1	2															yes
2019-04-25	B	outside	15:15:00	364	2															yes
2019-04-25	B	outside	15:15:00	365	2				2											yes
2019-04-25	B	outside	15:15:00	368	2															yes
2019-04-25	C	outside	11:25:00	370	2	20														yes
2019-04-25	C	outside	11:25:00	371/2	2	50														yes
2019-04-25	C	outside	11:25:00	376/7	2	25
2019-04-25	C	outside	11:25:00	378	2	35					1
2019-04-25	C	outside	15:25:00	370	2			2	1		1
2019-04-25	C	outside	15:25:00	371/2	2				2											yes
2019-04-25	C	outside	15:25:00	376/7	2
2019-04-25	C	outside	15:25:00	378	2
2019-04-25	D	outside	11:20:00	389	1	70	1
2019-04-25	D	outside	11:20:00	387	1	26			1
2019-04-25	D	outside	11:20:00	384	1	55	3		8
2019-04-25	D	outside	11:20:00	382	1	75			21
2019-04-25	D	outside	15:30:00	389	1				4
2019-04-25	D	outside	15:30:00	387	1				6
2019-04-25	D	outside	15:30:00	384	1				2
2019-04-25	D	outside	15:30:00	382	1			11	7
2019-04-25	E	outside	11:35:00	391	1	80					1
2019-04-25	E	outside	11:35:00	393	1	40
2019-04-25	E	outside	11:35:00	394/5	2	40					1
2019-04-25	E	outside	11:35:00	398/9	2	30
2019-04-25	E	outside	15:40:00	391	1
2019-04-25	E	outside	15:40:00	393	1
2019-04-25	E	outside	15:40:00	394/5	2
2019-04-25	E	outside	15:40:00	398/9	2
2019-04-25	1	inside	11:40:00	47	1	100														yes
2019-04-25	1	inside	11:40:00	53	1	200														yes	yes
2019-04-25	1	inside	11:40:00	65	1	230
2019-04-25	1	inside	11:40:00	77	1	200
2019-04-25	1	inside	15:45:00	47	1						1
2019-04-25	1	inside	15:45:00	53	1						3
2019-04-25	1	inside	15:45:00	65	1						2
2019-04-25	1	inside	15:45:00	77	1
2019-04-25	2	inside	11:50:00	128	1	170													2
2019-04-25	2	inside	11:50:00	110	1	140
2019-04-25	2	inside	11:50:00	104	1	260
2019-04-25	2	inside	11:50:00	92	1	160														yes
2019-04-25	2	inside	16:00:00	128	1						2
2019-04-25	2	inside	16:00:00	110	1						2
2019-04-25	2	inside	16:00:00	104	1
2019-04-25	2	inside	16:00:00	92	1															yes
2019-04-25	3	inside	12:00:00	143	1	230
2019-04-25	3	inside	12:00:00	161	1	200
2019-04-25	3	inside	12:00:00	176	1	200			3
2019-04-25	3	inside	12:00:00	179	1	180
2019-04-25	3	inside	16:05:00	143	1						1
2019-04-25	3	inside	16:05:00	161	1						1
2019-04-25	3	inside	16:05:00	176	1
2019-04-25	3	inside	16:05:00	179	1
2019-04-25	4	inside	11:50:00	224	2	160
2019-04-25	4	inside	11:50:00	218	2	180					2
2019-04-25	4	inside	11:50:00	212	2	180
2019-04-25	4	inside	11:50:00	200	2	200					1
2019-04-25	4	inside	15:55:00	224	2
2019-04-25	4	inside	15:55:00	218	2
2019-04-25	4	inside	15:55:00	212	2
2019-04-25	4	inside	15:55:00	200	2
2019-04-25	5	inside	11:40:00	227	2	150														yes
2019-04-25	5	inside	11:40:00	233	2	180					1									yes
2019-04-25	5	inside	11:40:00	245	2	180
2019-04-25	5	inside	11:40:00	257	2	160					1									yes
2019-04-25	5	inside	15:45:00	227	2
2019-04-25	5	inside	15:45:00	233	2
2019-04-25	5	inside	15:45:00	245	2
2019-04-25	5	inside	15:45:00	257	2
